# Supplementary material for: Analysis of in situ Transcriptomes Reveals Divergent Adaptive Response to Hyper- and Hypo-Salinity in the Hong Kong Oyster, Crassostrea hongkongensis
Source: Front Physiol. 2018 Oct 26;9:1491. doi: 10.3389/fphys.2018.01491 (PMC6212563; doi:10.3389/fphys.2018.01491)
Supplement: TABLE S3 — The gene list and functional annotation of DGEs under hyper-salinity. [file Table_3.XLSX]

## Sheet: supplementary Table3
GeneID	Length	control	hypersalinity	log2FoldChange(P6/P3)	Padj	Up/Down-Regulation	Pvalue	Cellular Component	Molecular Function	Biological Process	Kegg Orthology	Nr Description
Unigene0015894	2326	397.526	1016.2	1.35406	0.00357091	Up	7.15227e-05	NA	NA	NA	K14640//solute carrier family 20 (sodium-dependent phosphate transporter)	gi|762152635|ref|XP_011414326.1|//PREDICTED: sodium-dependent phosphate transporter 1-like [Crassostrea gigas]
Unigene0013384	709	514.822	193.213	-1.41388	1.56681e-05	Down	6.87414e-08	GO:0043231//intracellular membrane-bounded organelle;GO:0044444//cytoplasmic part	NA	NA	K14616//cubilin	gi|762103581|ref|XP_011434315.1|//PREDICTED: exoskeleton protein RP43-like isoform X4 [Crassostrea gigas]
Unigene0031957	2682	516.974	1828.89	1.82281	0.00365874	Up	7.36309e-05	NA	NA	NA	K06238//collagen, type VI, alpha	gi|762095041|ref|XP_011430018.1|//PREDICTED: CUB and sushi domain-containing protein 3-like isoform X2 [Crassostrea gigas]
Unigene0016244	2178	1474.91	151.184	-3.28625	4.20376e-46	Down	5.34591e-50	NA	GO:0016829//lyase activity	NA	K01594//sulfinoalanine decarboxylase [EC:4.1.1.29]	gi|405968820|gb|EKC33849.1|//Cysteine sulfinic acid decarboxylase [Crassostrea gigas]
Unigene0005556	1750	175.725	37.8886	-2.21348	0.00150914	Down	2.12548e-05	NA	NA	NA	NA	gi|762094058|ref|XP_011429501.1|//PREDICTED: uncharacterized protein LOC105329783 [Crassostrea gigas]
Unigene0032261	298	100.632	204.985	1.02643	0.00347501	Up	6.84971e-05	NA	NA	NA	NA	gi|762135988|ref|XP_011451251.1|//PREDICTED: protein Hook homolog 1-like [Crassostrea gigas]
Unigene0009161	1920	682.377	320.801	-1.08889	0.0177076	Down	0.000659989	NA	NA	NA	K02988//small subunit ribosomal protein S5	gi|762090651|ref|XP_011427707.1|//PREDICTED: WD repeat-containing protein 64-like isoform X3 [Crassostrea gigas]
Unigene0006253	1210	614.961	201.558	-1.6093	4.60029e-10	Down	8.04399e-13	NA	NA	NA	NA	gi|762084445|ref|XP_011424714.1|//PREDICTED: uncharacterized protein LOC105326400 [Crassostrea gigas]
Unigene0017438	1800	421.452	858.32	1.02615	0.0194036	Up	0.000757147	NA	NA	NA	K07194//Ras homolog gene family, member Q;K04393//cell division control protein 42	gi|405966980|gb|EKC32200.1|//Cell division control protein 42-like protein [Crassostrea gigas]
Unigene0033297	1243	118.67	311.622	1.39284	0.000807523	Up	9.44053e-06	NA	NA	NA	NA	NA
Unigene0024886	802	8.22181	276.458	5.07146	4.46586e-32	Up	1.27783e-35	NA	NA	NA	NA	NA
Unigene0025943	724	121.975	335.438	1.45946	2.19112e-06	Up	7.59306e-09	GO:0016020//membrane;GO:0016021//integral component of membrane;GO:0005886//plasma membrane	GO:0005230//extracellular ligand-gated ion channel activity	GO:0034220//ion transmembrane transport	K05194//glycine receptor alpha-2;K05195//glycine receptor alpha-3	gi|762129793|ref|XP_011448026.1|//PREDICTED: glycine receptor subunit alpha-3-like [Crassostrea gigas]
Unigene0017772	1719	22.605	128.878	2.51129	3.83015e-10	Up	6.33204e-13	NA	NA	NA	NA	gi|762107902|ref|XP_011436570.1|//PREDICTED: sterile alpha motif domain-containing protein 9-like [Crassostrea gigas]
Unigene0029498	505	2408.49	1170.01	-1.04161	0.0166754	Down	0.000603844	NA	NA	NA	NA	gi|405969740|gb|EKC34693.1|//hypothetical protein CGI_10026830 [Crassostrea gigas]
Unigene0017166	1870	104.069	42.7801	-1.28253	0.0216363	Down	0.000881557	NA	NA	NA	K02912//large subunit ribosomal protein L32e	gi|762157241|ref|XP_011416769.1|//PREDICTED: EF-hand calcium-binding domain-containing protein 12-like [Crassostrea gigas]
Unigene0028061	588	3.83023	20.8512	2.44462	0.00717945	Up	0.00018283	NA	NA	NA	NA	NA
Unigene0024529	832	57.712	23.875	-1.27337	0.0263136	Down	0.00115707	NA	NA	NA	K04936//potassium large conductance calcium-activated channel subfamily M alpha member 1	gi|762118256|ref|XP_011442011.1|//PREDICTED: calcium-activated potassium channel slowpoke-like isoform X12 [Crassostrea gigas]
Unigene0002027	503	58.8478	214.233	1.86412	1.02214e-07	Up	2.7297e-10	NA	NA	NA	NA	NA
Unigene0032988	518	8284.17	3866.51	-1.09933	1.74225e-05	Down	7.97623e-08	NA	NA	NA	NA	NA
Unigene0025970	724	28.286	253.968	3.16649	4.32705e-10	Up	7.42865e-13	NA	NA	NA	NA	gi|762155707|ref|XP_011415961.1|//PREDICTED: uncharacterized protein LOC105319927 [Crassostrea gigas]
Unigene0032745	296	34.2012	81.0041	1.24395	0.0277883	Up	0.00125031	NA	NA	NA	NA	NA
Unigene0017715	1735	137.878	278.901	1.01636	0.0247829	Up	0.00106604	NA	NA	NA	K04239//hypocretin (orexin) receptor 2;K04194//cholecystokinin A receptor;K04207//neuropeptide Y receptor type 5	gi|405974887|gb|EKC39499.1|//Cholecystokinin receptor [Crassostrea gigas]
Unigene0008360	2322	851.286	421.433	-1.01434	0.013337	Down	0.000433346	NA	NA	NA	K18441//cytohesin	gi|762078168|ref|XP_011452558.1|//PREDICTED: ankyrin repeat and EF-hand domain-containing protein 1-like isoform X3 [Crassostrea gigas]
Unigene0020327	1269	32.0104	115.527	1.85162	0.00212595	Up	3.39974e-05	NA	NA	NA	NA	gi|762106770|ref|XP_011435982.1|//PREDICTED: uncharacterized protein LOC105334289 isoform X1 [Crassostrea gigas]
Unigene0031752	2095	2577.47	814.704	-1.66161	0.000385297	Down	3.55237e-06	NA	NA	NA	K00820//glucosamine--fructose-6-phosphate aminotransferase (isomerizing) [EC:2.6.1.16]	gi|762127174|ref|XP_011446662.1|//PREDICTED: glutamine--fructose-6-phosphate aminotransferase [isomerizing] 2-like isoform X7 [Crassostrea gigas]
Unigene0022798	696	1002.63	368.93	-1.44237	0.000348113	Down	3.09887e-06	NA	NA	NA	NA	gi|762145785|ref|XP_011456173.1|//PREDICTED: uncharacterized protein LOC105348454 [Crassostrea gigas]
Unigene0006186	220	1598.44	517.837	-1.6261	0.000727207	Down	8.27685e-06	NA	GO:1901363//heterocyclic compound binding;GO:0097159//organic cyclic compound binding;GO:0005524//ATP binding;GO:0004054//arginine kinase activity;GO:0036094//small molecule binding;GO:0016772//transferase activity, transferring phosphorus-containing groups	GO:0016310//phosphorylation	K00933//creatine kinase [EC:2.7.3.2]	gi|762080307|ref|XP_011416277.1|//PREDICTED: taurocyamine kinase-like [Crassostrea gigas]
Unigene0027309	634	98.7213	45.1762	-1.1278	0.0203749	Down	0.00081093	NA	NA	NA	NA	gi|676434830|ref|XP_009047357.1|//hypothetical protein LOTGIDRAFT_230585 [Lottia gigantea]
Unigene0025632	746	3182.85	6531.89	1.03718	0.00378507	Up	7.89895e-05	NA	NA	NA	NA	gi|762097275|ref|XP_011431200.1|//PREDICTED: uncharacterized protein LOC105330947 [Crassostrea gigas]
Unigene0008066	2255	1199.79	563.385	-1.09059	0.0169886	Down	0.000618618	NA	NA	NA	NA	gi|762109421|ref|XP_011437367.1|//PREDICTED: transmembrane protein 8A-like isoform X2 [Crassostrea gigas]
Unigene0028258	577	227.918	100.22	-1.18534	0.0103007	Down	0.000298339	NA	NA	NA	NA	gi|762136572|ref|XP_011451567.1|//PREDICTED: radial spoke head 10 homolog B-like isoform X2 [Crassostrea gigas]
Unigene0022202	1045	178.612	376.089	1.07424	0.042339	Up	0.00233219	NA	NA	NA	NA	gi|762098334|ref|XP_011431559.1|//PREDICTED: uncharacterized protein LOC105331166 isoform X2 [Crassostrea gigas]
Unigene0031711	1160	104.645	263.725	1.33353	0.00887342	Up	0.000240638	NA	NA	NA	NA	NA
Unigene0001675	3004	1376.09	487.957	-1.49575	4.93165e-05	Down	2.66542e-07	NA	NA	NA	NA	gi|762123142|ref|XP_011444541.1|//PREDICTED: IQ and ubiquitin-like domain-containing protein isoform X2 [Crassostrea gigas]
Unigene0023883	884	114.002	52.3756	-1.1221	0.0361088	Down	0.00187351	NA	NA	NA	NA	gi|762080370|ref|XP_011416604.1|//PREDICTED: cilia- and flagella-associated protein 54-like [Crassostrea gigas]
Unigene0010731	496	13.4056	45.6517	1.76783	0.0409977	Up	0.00224188	NA	NA	NA	K01315//plasminogen [EC:3.4.21.7]	gi|762091621|ref|XP_011428213.1|//PREDICTED: plasminogen-like [Crassostrea gigas]
Unigene0033105	279	11.7871	31.5396	1.41995	0.0408464	Up	0.00222321	NA	NA	NA	NA	NA
Unigene0010962	840	195.424	57.0311	-1.77679	0.000513303	Down	5.23846e-06	NA	NA	NA	K19626//inversin	gi|762102342|ref|XP_011433665.1|//PREDICTED: ankyrin repeat domain-containing protein 55-like isoform X6 [Crassostrea gigas]
Unigene0012866	389	118.412	32.1946	-1.87893	0.000190397	Down	1.44526e-06	GO:0031224//intrinsic component of membrane;GO:0016021//integral component of membrane	NA	GO:0006810//transport;GO:0051234//establishment of localization	K15100//solute carrier family 25 (mitochondrial citrate transporter), member 1	gi|762133886|ref|XP_011450157.1|//PREDICTED: tricarboxylate transport protein, mitochondrial-like [Crassostrea gigas]
Unigene0011341	739	538.299	183.771	-1.5505	0.00242781	Down	3.99166e-05	NA	NA	NA	NA	gi|762125860|ref|XP_011445968.1|//PREDICTED: spermatogenesis-associated protein 6-like isoform X3 [Crassostrea gigas]
Unigene0022707	991	11.3993	40.4035	1.82554	0.0114295	Up	0.000345568	GO:0016021//integral component of membrane	NA	GO:0007165//signal transduction	K18808//toll-like receptor 13	gi|405976671|gb|EKC41169.1|//Toll-like receptor 4 [Crassostrea gigas]
Unigene0005287	2812	391.236	789.002	1.01199	0.00124833	Up	1.64704e-05	GO:0005783//endoplasmic reticulum;GO:0044425//membrane part	GO:0008374//O-acyltransferase activity	NA	K11155//diacylglycerol O-acyltransferase 1 [EC:2.3.1.20 2.3.1.75 2.3.1.76]	gi|762098808|ref|XP_011431805.1|//PREDICTED: diacylglycerol O-acyltransferase 1-like isoform X1 [Crassostrea gigas]
Unigene0026449	687	34.3131	96.6608	1.49417	0.0240465	Up	0.00101908	NA	GO:0016829//lyase activity	NA	K01594//sulfinoalanine decarboxylase [EC:4.1.1.29]	gi|762169169|ref|XP_011422983.1|//PREDICTED: cysteine sulfinic acid decarboxylase-like [Crassostrea gigas]
Unigene0001684	942	96.6127	23.1159	-2.06333	0.000482321	Down	4.7996e-06	NA	NA	NA	NA	NA
Unigene0015019	2814	69.2088	22.5252	-1.61941	0.0129113	Down	0.000415408	NA	NA	NA	K00665//fatty acid synthase, animal type [EC:2.3.1.85]	gi|762118975|ref|XP_011442387.1|//PREDICTED: fatty acid synthase-like [Crassostrea gigas]
Unigene0007694	275	1.82734	14.9993	3.03708	0.000278831	Up	2.36688e-06	NA	NA	NA	NA	NA
Unigene0019352	1413	49.2394	117.107	1.24994	0.0409977	Up	0.00224068	NA	NA	NA	K08129//nyctalopin;K13023//carboxypeptidase N regulatory subunit;K06839//slit 2	gi|762120817|ref|XP_011443326.1|//PREDICTED: leucine-rich repeat transmembrane neuronal protein 3-like [Crassostrea gigas]
Unigene0018770	1513	126.759	52.0826	-1.28321	0.0120157	Down	0.000370548	NA	NA	NA	K17572//brefeldin A-inhibited guanine nucleotide-exchange protein 3	gi|762112961|ref|XP_011439228.1|//PREDICTED: brefeldin A-inhibited guanine nucleotide-exchange protein 3-like [Crassostrea gigas]
Unigene0002024	711	56.2256	155.857	1.47093	0.0054447	Up	0.000130044	NA	NA	NA	NA	NA
Unigene0012665	526	12.6887	68.5509	2.43363	0.0036915	Up	7.45248e-05	NA	NA	NA	K18744//caprin-2	gi|762147908|ref|XP_011411876.1|//PREDICTED: complement C1q tumor necrosis factor-related protein 4-like [Crassostrea gigas]
Unigene0010826	947	617.392	1494.66	1.27556	0.0141309	Up	0.000469033	NA	NA	NA	NA	gi|405952505|gb|EKC20306.1|//Ninjurin-1 [Crassostrea gigas]
Unigene0009571	418	44.6691	152.212	1.76873	0.00214128	Up	3.43106e-05	NA	NA	NA	NA	NA
Unigene0007330	840	336.043	1433.97	2.0933	2.06694e-14	Up	2.10282e-17	NA	NA	NA	NA	gi|762119677|ref|XP_011442752.1|//PREDICTED: uncharacterized protein LOC105339048 [Crassostrea gigas]
Unigene0012220	734	149.993	71.3147	-1.07262	0.0243087	Down	0.0010356	NA	NA	NA	K00621//glucosamine-phosphate N-acetyltransferase [EC:2.3.1.4]	gi|762156455|ref|XP_011416357.1|//PREDICTED: glucosamine 6-phosphate N-acetyltransferase-like [Crassostrea gigas]
Unigene0006121	883	18.2748	55.9713	1.61483	0.015719	Up	0.000553234	NA	NA	NA	K12812//ATP-dependent RNA helicase UAP56/SUB2 [EC:3.6.4.13]	gi|762153780|ref|XP_011414937.1|//PREDICTED: spliceosome RNA helicase DDX39B-like isoform X1 [Crassostrea gigas]
Unigene0003497	399	8.05562	34.6076	2.10302	0.00490286	Up	0.000111918	NA	NA	NA	NA	NA
Unigene0014346	3503	13.9623	48.1607	1.78632	0.00647736	Up	0.000160009	NA	NA	NA	K20051//low-density lipoprotein receptor-related protein 4	gi|405968610|gb|EKC33666.1|//Low-density lipoprotein receptor-related protein 6 [Crassostrea gigas]
Unigene0033270	2712	5185.5	2534.01	-1.03306	0.0141309	Down	0.000468265	NA	NA	NA	K18630//tektin-3	gi|405975469|gb|EKC40032.1|//Tektin-3 [Crassostrea gigas]
Unigene0018079	1654	33.0342	6.05023	-2.4489	0.0060291	Down	0.000147018	NA	NA	NA	NA	gi|762167361|ref|XP_011422010.1|//PREDICTED: uncharacterized protein LOC105324593 isoform X1 [Crassostrea gigas]
Unigene0003210	414	128.263	24.9481	-2.3621	0.00157263	Down	2.2449e-05	NA	NA	NA	NA	gi|762146452|ref|XP_011456523.1|//PREDICTED: uncharacterized protein LOC105348695 [Crassostrea gigas]
Unigene0030116	455	231.671	87.4999	-1.40472	0.00293341	Down	5.29719e-05	NA	NA	NA	K08202//MFS transporter, OCT family, solute carrier family 22 (organic cation transporter), member 4/5	gi|762099113|ref|XP_011431970.1|//PREDICTED: organic cation transporter protein-like [Crassostrea gigas]
Unigene0025017	793	16.3779	72.885	2.15387	0.00614824	Up	0.000150901	NA	NA	NA	NA	NA
Unigene0016460	2098	95.4003	289.419	1.6011	0.00854138	Up	0.000228566	NA	NA	NA	NA	gi|405952505|gb|EKC20306.1|//Ninjurin-1 [Crassostrea gigas]
Unigene0025982	719	96.5282	47.5845	-1.02046	0.0398121	Down	0.00213528	NA	NA	NA	NA	NA
Unigene0014465	3350	166.941	57.4964	-1.53779	0.0092473	Down	0.000256312	NA	NA	NA	NA	gi|762161457|ref|XP_011418954.1|//PREDICTED: uncharacterized protein LOC105322112 [Crassostrea gigas]
Unigene0024185	857	208.503	488.78	1.22912	5.23752e-05	Up	2.93064e-07	NA	NA	NA	K06468//low affinity immunoglobulin epsilon Fc receptor;K17513//C-type lectin superfamily 17 member A	gi|762163569|ref|XP_011420077.1|//PREDICTED: low affinity immunoglobulin epsilon Fc receptor-like [Crassostrea gigas]
Unigene0004426	254	99.1495	48.2812	-1.03814	0.0229778	Down	0.000959172	NA	NA	NA	K06776//receptor-type tyrosine-protein phosphatase kappa [EC:3.1.3.48];K18033//receptor-type tyrosine-protein phosphatase epsilon [EC:3.1.3.48];K18032//receptor-type tyrosine-protein phosphatase A [EC:3.1.3.48]	gi|762097443|ref|XP_011431289.1|//PREDICTED: receptor-type tyrosine-protein phosphatase epsilon-like [Crassostrea gigas]
Unigene0017573	1771	1128.09	529.155	-1.09212	0.00127744	Down	1.70575e-05	NA	NA	NA	NA	gi|405961556|gb|EKC27343.1|//hypothetical protein CGI_10010367 [Crassostrea gigas]
Unigene0024565	826	66.4337	307.047	2.20847	8.9568e-16	Up	7.97325e-19	NA	NA	NA	NA	NA
Unigene0026327	698	6.45771	31.1342	2.26941	0.00599429	Up	0.000145904	NA	NA	NA	NA	gi|762097579|ref|XP_011431363.1|//PREDICTED: uncharacterized protein LOC105331034 isoform X1 [Crassostrea gigas]
Unigene0019375	1406	16.5347	59.1934	1.83994	0.00349761	Up	6.91323e-05	NA	NA	NA	NA	gi|762117829|ref|XP_011441782.1|//PREDICTED: uncharacterized protein LOC105338383 [Crassostrea gigas]
Unigene0003364	1133	108.67	326.001	1.58492	0.0104346	Up	0.00030412	NA	NA	NA	NA	NA
Unigene0007002	958	1215.53	544.868	-1.1576	0.00339065	Down	6.6403e-05	NA	NA	NA	NA	gi|405950168|gb|EKC18171.1|//UPF0573 protein C2orf70-like protein A [Crassostrea gigas]
Unigene0016319	2145	26.9315	139.009	2.36781	6.2478e-07	Up	1.88701e-09	NA	NA	NA	K13912//deleted in malignant brain tumors 1 protein	gi|762148119|ref|XP_011411982.1|//PREDICTED: golgin subfamily B member 1-like [Crassostrea gigas]
Unigene0027203	641	49.7126	154.304	1.63409	1.20894e-06	Up	3.99725e-09	NA	NA	NA	K06278//caveolin 1	gi|405965730|gb|EKC31084.1|//Caveolin-1 [Crassostrea gigas]
Unigene0013261	328	30.3113	81.4899	1.42677	0.0472033	Up	0.00273879	NA	NA	NA	NA	NA
Unigene0030547	340	378.432	10.9087	-5.11648	2.00958e-41	Down	3.19448e-45	NA	NA	NA	NA	NA
Unigene0003199	1137	847.215	1753.2	1.04919	0.00254272	Up	4.3249e-05	NA	NA	NA	K01166//ribonuclease T2 [EC:3.1.27.1]	gi|762144234|ref|XP_011455383.1|//PREDICTED: ribonuclease Oy-like [Crassostrea gigas]
Unigene0010578	923	193.904	55.3134	-1.80964	0.0109383	Down	0.000324456	NA	NA	NA	NA	gi|762140243|ref|XP_011453287.1|//PREDICTED: uncharacterized protein LOC105346430 [Crassostrea gigas]
Unigene0009209	1377	1274.07	634.534	-1.00567	0.000227816	Down	1.81071e-06	NA	NA	NA	K17341//hemicentin	gi|762109902|ref|XP_011437617.1|//PREDICTED: coadhesin-like isoform X2 [Crassostrea gigas]
Unigene0026082	717	8.95277	311.935	5.12277	8.08401e-28	Up	3.59815e-31	GO:0016020//membrane	GO:0004180//carboxypeptidase activity;GO:0008241//peptidyl-dipeptidase activity;GO:0046872//metal ion binding;GO:0008237//metallopeptidase activity	GO:0006508//proteolysis	K01283//peptidyl-dipeptidase A [EC:3.4.15.1]	gi|871228206|ref|XP_012937156.1|//PREDICTED: angiotensin-converting enzyme-like [Aplysia californica]
Unigene0016288	2155	866.329	387.996	-1.15888	0.0159561	Down	0.000565116	NA	NA	NA	NA	gi|762117311|ref|XP_011441507.1|//PREDICTED: uncharacterized protein LOC105338204 isoform X1 [Crassostrea gigas]
Unigene0015318	2605	457.621	190.063	-1.26767	0.00120225	Down	1.55948e-05	NA	NA	NA	NA	gi|762104560|ref|XP_011434824.1|//PREDICTED: uncharacterized protein LOC105333508 isoform X2 [Crassostrea gigas]
Unigene0026174	709	293.835	988.412	1.7501	0.00460049	Up	0.000102529	NA	NA	NA	NA	gi|405955674|gb|EKC22696.1|//hypothetical protein CGI_10001667 [Crassostrea gigas]
Unigene0025723	734	3.74445	14.3187	1.93507	0.043948	Up	0.00247538	NA	NA	NA	NA	NA
Unigene0024930	800	22.8798	4.80612	-2.25113	0.00520586	Down	0.000121648	NA	NA	NA	K20051//low-density lipoprotein receptor-related protein 4	gi|762091795|ref|XP_011428305.1|//PREDICTED: low-density lipoprotein receptor-related protein 4-like [Crassostrea gigas]
Unigene0018234	1624	51.1968	17.8517	-1.51999	0.0141309	Down	0.000469543	NA	NA	NA	K18259//protein amnionless	gi|762154201|ref|XP_011415162.1|//PREDICTED: protein amnionless-like isoform X2 [Crassostrea gigas]
Unigene0021046	1175	823.762	5306.16	2.68737	1.91461e-09	Up	3.71308e-12	NA	NA	NA	K14709//solute carrier family 39 (zinc transporter), member 1/2/3	gi|405963375|gb|EKC28954.1|//Zinc transporter ZIP1 [Crassostrea gigas]
Unigene0032129	359	8.43628	58.5982	2.79618	0.000251019	Up	2.05099e-06	NA	NA	NA	NA	NA
Unigene0015464	2542	371.496	185.685	-1.00049	0.00670995	Down	0.000167248	NA	NA	NA	K10380//ankyrin;K20175//ankyrin repeat domain-containing protein 27	gi|405954961|gb|EKC22251.1|//Ankyrin repeat domain-containing protein 53 [Crassostrea gigas]
Unigene0024316	843	78.5052	207.762	1.40407	0.00834328	Up	0.000220035	NA	NA	NA	NA	NA
Unigene0022036	1061	433.141	160.613	-1.43125	0.00502176	Down	0.00011559	NA	NA	NA	K14165//atypical dual specificity phosphatase [EC:3.1.3.16 3.1.3.48];K04257//olfactory receptor	gi|762101258|ref|XP_011433102.1|//PREDICTED: coiled-coil domain-containing protein 81-like isoform X4 [Crassostrea gigas]
Unigene0018355	1592	5.25551	20.7001	1.97773	0.0350461	Up	0.00178853	NA	NA	NA	NA	NA
Unigene0015161	2717	47.477	140.823	1.56858	0.000129288	Up	8.54957e-07	NA	NA	NA	K09062//bZIP factor, other;K09057//hepatic leukemia factor	gi|762158212|ref|XP_011417277.1|//PREDICTED: protein giant-like [Crassostrea gigas]
Unigene0012011	594	67.8741	149.63	1.14047	0.00607868	Up	0.000148807	NA	NA	NA	NA	NA
Unigene0018033	1660	22.5649	66.6573	1.56268	0.0243397	Up	0.00103847	NA	NA	NA	NA	NA
Unigene0010612	1212	20985.3	46376.9	1.14403	4.00456e-05	Up	2.03987e-07	NA	NA	NA	NA	gi|762164777|ref|XP_011420716.1|//PREDICTED: uncharacterized protein LOC105323307 [Crassostrea gigas]
Unigene0031033	907	443.079	1019.57	1.20233	0.0351097	Up	0.00179881	NA	NA	NA	K06238//collagen, type VI, alpha	gi|762086866|ref|XP_011425715.1|//PREDICTED: collagen alpha-1(XII) chain-like [Crassostrea gigas]
Unigene0005933	548	53.5318	14.2832	-1.90607	0.0166773	Down	0.000604443	GO:0005576//extracellular region	GO:0004553//hydrolase activity, hydrolyzing O-glycosyl compounds;GO:0008061//chitin binding;GO:0097367//carbohydrate derivative binding;GO:0004568//chitinase activity	GO:0006032//chitin catabolic process;GO:0005975//carbohydrate metabolic process;GO:0044238//primary metabolic process;GO:0006026//aminoglycan catabolic process	K01183//chitinase [EC:3.2.1.14]	gi|92110430|emb|CAI96025.1|//Chit2 protein [Crassostrea gigas]
Unigene0019227	1431	59.9729	145.972	1.28331	0.00844854	Up	0.000224818	NA	NA	NA	K04239//hypocretin (orexin) receptor 2;K04194//cholecystokinin A receptor;K04282//thyrotropin-releasing hormone receptor	gi|405967034|gb|EKC32248.1|//Thyrotropin-releasing hormone receptor [Crassostrea gigas]
Unigene0009581	528	81.9638	32.8992	-1.31693	0.0385351	Down	0.00203616	NA	NA	NA	NA	gi|762109516|ref|XP_011437417.1|//PREDICTED: uncharacterized protein LOC105335291 [Crassostrea gigas]
Unigene0019696	1354	44.0514	120.85	1.45596	0.0302692	Up	0.00144061	NA	NA	GO:0006811//ion transport	K14683//solute carrier family 34 (sodium-dependent phosphate cotransporter)	gi|762126177|ref|XP_011446136.1|//PREDICTED: sodium-dependent phosphate transport protein 2B-like isoform X3 [Crassostrea gigas]
Unigene0027083	648	3.63044	14.1359	1.96114	0.0313659	Up	0.00151574	NA	NA	NA	K16196//eukaryotic translation initiation factor 2-alpha kinase 4 [EC:2.7.11.1];K05109//Eph receptor A8 [EC:2.7.10.1];K04612//calcium-sensing receptor	gi|762083762|ref|XP_011424343.1|//PREDICTED: uncharacterized protein LOC105326175 [Crassostrea gigas]
Unigene0006716	1795	2102.76	819.917	-1.35874	0.000323159	Down	2.78426e-06	NA	NA	NA	K07197//sterol regulatory element-binding transcription factor 1	gi|762078085|ref|XP_011452106.1|//PREDICTED: sterol regulatory element-binding protein 1-like [Crassostrea gigas]
Unigene0028645	554	25.4181	98.3098	1.95148	0.000470376	Up	4.65082e-06	NA	NA	NA	NA	NA
Unigene0000449	689	1395.24	505.352	-1.46515	0.0128292	Down	0.000410317	NA	NA	NA	NA	gi|405948629|gb|EKC17950.1|//hypothetical protein CGI_10000009 [Crassostrea gigas]
Unigene0007068	383	20.8814	126.117	2.59447	0.000962058	Up	1.16227e-05	NA	NA	GO:0044710//single-organism metabolic process	NA	gi|405977458|gb|EKC41909.1|//Phytanoyl-CoA dioxygenase, peroxisomal [Crassostrea gigas]
Unigene0033037	644	14.6536	1.85054	-2.98523	0.000386888	Down	3.5917e-06	NA	NA	NA	NA	NA
Unigene0004244	681	335.845	162.449	-1.04781	0.0211575	Down	0.000855609	NA	NA	NA	K05849//solute carrier family 8 (sodium/calcium exchanger)	gi|762155073|ref|XP_011415627.1|//PREDICTED: sodium/calcium exchanger 3-like isoform X4 [Crassostrea gigas]
Unigene0020072	1300	1330.35	4156.5	1.64356	0.001777	Up	2.66657e-05	NA	NA	NA	NA	gi|762097275|ref|XP_011431200.1|//PREDICTED: uncharacterized protein LOC105330947 [Crassostrea gigas]
Unigene0008417	2453	24.4225	62.2453	1.34975	0.0177565	Up	0.000663316	NA	NA	NA	K04261//prostaglandin E receptor 4	gi|762081170|ref|XP_011420893.1|//PREDICTED: prostaglandin E2 receptor EP4 subtype-like [Crassostrea gigas]
Unigene0001396	1008	16.3633	119.219	2.86508	5.2104e-05	Up	2.88234e-07	NA	NA	NA	K18032//receptor-type tyrosine-protein phosphatase A [EC:3.1.3.48]	gi|762153725|ref|XP_011414907.1|//PREDICTED: receptor-type tyrosine-protein phosphatase epsilon-like isoform X2 [Crassostrea gigas]
Unigene0014744	3043	67.4998	182.571	1.4355	0.0181687	Up	0.000689814	NA	NA	NA	NA	gi|762116551|ref|XP_011441116.1|//PREDICTED: uncharacterized protein LOC105337883 [Crassostrea gigas]
Unigene0020259	1271	11.2957	49.6369	2.13565	0.00324276	Up	6.15519e-05	GO:0016020//membrane	NA	NA	K03131//transcription initiation factor TFIID subunit 6	gi|762121030|ref|XP_011443430.1|//PREDICTED: transmembrane protein 179B-like [Crassostrea gigas]
Unigene0004860	455	106.527	564.757	2.40641	0.00856032	Up	0.000229425	NA	NA	NA	NA	gi|762159502|ref|XP_011417947.1|//PREDICTED: uncharacterized protein LOC105321376 [Crassostrea gigas]
Unigene0006125	1359	291.52	630.021	1.1118	0.0104346	Up	0.000305078	GO:0016021//integral component of membrane	GO:0005328//neurotransmitter:sodium symporter activity	GO:0055085//transmembrane transport;GO:0006836//neurotransmitter transport	K05038//solute carrier family 6 (neurotransmitter transporter, amino acid) member 5/7/9/14	gi|762104644|ref|XP_011434867.1|//PREDICTED: sodium- and chloride-dependent GABA transporter 1-like isoform X1 [Crassostrea gigas]
Unigene0004081	902	5.59313	26.6308	2.25137	0.0124961	Up	0.000394899	NA	NA	NA	NA	NA
Unigene0008496	1616	835.844	352.937	-1.24382	0.0105363	Down	0.000308513	NA	GO:0005515//protein binding	GO:0050794//regulation of cellular process;GO:0044763//single-organism cellular process;GO:0048513//animal organ development;GO:0003006//developmental process involved in reproduction;GO:0044238//primary metabolic process;GO:0044767//single-organism developmental process;GO:1901362//organic cyclic compound biosynthetic process	K08562//nuclear receptor subfamily 0 group B member 1;K08563//nuclear receptor subfamily 0 group B member 2	gi|405960973|gb|EKC26839.1|//Nuclear receptor subfamily 0 group B member 1 [Crassostrea gigas]
Unigene0007037	722	2.52631	40.7305	4.01101	6.95646e-09	Up	1.59237e-11	NA	NA	NA	NA	gi|762092909|ref|XP_011428896.1|//PREDICTED: uncharacterized protein LOC105329372 isoform X2 [Crassostrea gigas]
Unigene0003119	321	16.0212	51.3158	1.67942	0.0138771	Up	0.000457512	NA	NA	NA	NA	gi|762129656|ref|XP_011447952.1|//PREDICTED: uncharacterized protein LOC105342660 isoform X6 [Crassostrea gigas]
Unigene0001835	966	264.259	564.78	1.09574	0.000264883	Up	2.21195e-06	NA	NA	NA	NA	gi|762155965|ref|XP_011416096.1|//PREDICTED: scaffold attachment factor B1-like isoform X3 [Crassostrea gigas]
Unigene0021658	1102	30.5122	153.246	2.3284	1.56994e-05	Up	6.95677e-08	NA	NA	NA	K09614//corin [EC:3.4.21.-];K02375//frizzled 5/8	gi|405962300|gb|EKC27992.1|//Frizzled-5 [Crassostrea gigas]
Unigene0020656	1221	1264.97	597.672	-1.08168	0.00024942	Down	2.03e-06	GO:0044424//intracellular part	GO:0016701//oxidoreductase activity, acting on single donors with incorporation of molecular oxygen;GO:0046914//transition metal ion binding	GO:0006020//inositol metabolic process	K00469//inositol oxygenase [EC:1.13.99.1]	gi|405965046|gb|EKC30474.1|//Inositol oxygenase [Crassostrea gigas]
Unigene0021386	1134	688.815	3381.63	2.29553	0.0134715	Up	0.000440485	GO:0016021//integral component of membrane	NA	GO:0050829//defense response to Gram-negative bacterium;GO:0050830//defense response to Gram-positive bacterium	NA	gi|332692897|gb|AEE92778.1|//big defensin 3 [Crassostrea gigas]
Unigene0003349	614	6.56651	25.3243	1.94733	0.0194036	Up	0.000756891	GO:0016021//integral component of membrane	NA	NA	NA	gi|762117327|ref|XP_011441516.1|//PREDICTED: uncharacterized protein LOC105338211 isoform X2 [Crassostrea gigas]
Unigene0012483	701	53.504	108.148	1.01528	0.042339	Up	0.00233537	NA	NA	NA	NA	gi|405970016|gb|EKC34955.1|//Allantoinase, mitochondrial [Crassostrea gigas]
Unigene0005214	1395	55.0368	130.163	1.24186	0.0114393	Up	0.000346901	NA	NA	NA	NA	NA
Unigene0003209	218	48.1485	12.3558	-1.96231	0.0219719	Down	0.000901189	NA	NA	NA	NA	gi|762146452|ref|XP_011456523.1|//PREDICTED: uncharacterized protein LOC105348695 [Crassostrea gigas]
Unigene0030182	447	14.9196	43.0078	1.52739	0.0387163	Up	0.00206169	NA	NA	NA	K06468//low affinity immunoglobulin epsilon Fc receptor;K17513//C-type lectin superfamily 17 member A	gi|762146162|ref|XP_011456376.1|//PREDICTED: low affinity immunoglobulin epsilon Fc receptor-like isoform X2 [Crassostrea gigas]
Unigene0016234	2181	201.897	510.43	1.33809	0.00152375	Up	2.16009e-05	NA	NA	NA	K08749//solute carrier family 27 (fatty acid transporter), member 6;K08746//solute carrier family 27 (fatty acid transporter), member 2 [EC:6.2.1.- 6.2.1.3]	gi|762082390|ref|XP_011424004.1|//PREDICTED: long-chain fatty acid transport protein 6-like [Crassostrea gigas]
Unigene0022162	1048	74.2148	302.859	2.02887	0.000179694	Up	1.29112e-06	NA	NA	NA	NA	gi|762117380|ref|XP_011441544.1|//PREDICTED: uncharacterized protein LOC105338226 [Crassostrea gigas]
Unigene0014133	3793	552.741	212.785	-1.37721	0.000132347	Down	8.83602e-07	NA	NA	NA	K12491//Arf-GAP with GTPase, ANK repeat and PH domain-containing protein 1/3;K17570//hydrocephalus-inducing protein	gi|762143761|ref|XP_011455138.1|//PREDICTED: uncharacterized protein LOC105347671 [Crassostrea gigas]
Unigene0016096	2235	2069	897.524	-1.20491	0.00147798	Down	2.0628e-05	NA	NA	NA	NA	gi|762125439|ref|XP_011445745.1|//PREDICTED: sperm-tail PG-rich repeat-containing protein 2-like [Crassostrea gigas]
Unigene0013385	226	97.6062	34.183	-1.51369	0.00450085	Down	9.97358e-05	NA	NA	NA	NA	gi|762103581|ref|XP_011434315.1|//PREDICTED: exoskeleton protein RP43-like isoform X4 [Crassostrea gigas]
Unigene0025855	730	78.989	180.415	1.19159	0.000512246	Up	5.21138e-06	NA	NA	NA	K11997//tripartite motif-containing protein 2/3	gi|405959516|gb|EKC25545.1|//hypothetical protein CGI_10008389 [Crassostrea gigas]
Unigene0016728	2006	749.821	298.652	-1.32808	0.000743582	Down	8.57916e-06	NA	NA	NA	K19755//radial spoke head protein 1;K07209//inhibitor of nuclear factor kappa-B kinase subunit beta [EC:2.7.11.10];K19530//junctophilin	gi|762136572|ref|XP_011451567.1|//PREDICTED: radial spoke head 10 homolog B-like isoform X2 [Crassostrea gigas]
Unigene0022951	966	12.6097	94.6428	2.90795	3.66752e-05	Up	1.83061e-07	NA	NA	NA	NA	NA
Unigene0000949	974	12.2458	40.6269	1.73015	0.033379	Up	0.00167162	NA	NA	NA	K18032//receptor-type tyrosine-protein phosphatase A [EC:3.1.3.48]	gi|762167067|ref|XP_011421851.1|//PREDICTED: cell death abnormality protein 1-like [Crassostrea gigas]
Unigene0012894	502	55.5156	128.507	1.21089	0.0127329	Up	0.00040562	NA	NA	NA	K16060//baculoviral IAP repeat-containing protein 2/3	gi|762089478|ref|XP_011427091.1|//PREDICTED: apoptosis 2 inhibitor-like isoform X3 [Crassostrea gigas]
Unigene0018540	1546	16.5399	62.466	1.91712	0.0459679	Up	0.00263058	NA	NA	NA	NA	gi|405945332|gb|EKC17279.1|//Tripartite motif-containing protein 3 [Crassostrea gigas]
Unigene0025154	780	82.4203	186.294	1.17651	0.0195291	Up	0.00076492	NA	NA	NA	NA	gi|762107360|ref|XP_011436280.1|//PREDICTED: uncharacterized protein LOC105334499 [Crassostrea gigas]
Unigene0025354	765	86.2961	38.09	-1.17988	0.0340281	Down	0.00171796	NA	NA	NA	K12617//DNA topoisomerase 2-associated protein PAT1	gi|762132285|ref|XP_011449326.1|//PREDICTED: protein PAT1 homolog 1-like isoform X3 [Crassostrea gigas]
Unigene0026810	662	88.773	190.595	1.10232	0.0346059	Up	0.00175813	NA	NA	NA	NA	gi|762091338|ref|XP_011428064.1|//PREDICTED: uncharacterized protein LOC105328754 isoform X2 [Crassostrea gigas]
Unigene0020544	1239	80.1748	385.569	2.26577	1.83431e-07	Up	5.19022e-10	NA	NA	NA	NA	gi|762085780|ref|XP_011425204.1|//PREDICTED: uncharacterized protein LOC105326730 isoform X1 [Crassostrea gigas]
Unigene0013429	1294	109.389	357.416	1.70813	0.00480848	Up	0.000108846	NA	NA	NA	NA	gi|405946795|gb|EKC17717.1|//hypothetical protein CGI_10000305 [Crassostrea gigas]
Unigene0017827	1712	50.3511	120.505	1.25899	0.033379	Up	0.00166962	NA	NA	NA	NA	gi|762135178|ref|XP_011450833.1|//PREDICTED: zinc finger protein 782-like [Crassostrea gigas]
Unigene0000594	296	2.19665	18.9877	3.11169	0.000186357	Up	1.36034e-06	NA	NA	NA	NA	NA
Unigene0030387	408	61.2584	173.353	1.50073	0.0192053	Up	0.000745332	NA	NA	NA	NA	gi|762141123|ref|XP_011453747.1|//PREDICTED: interferon alpha-inducible protein 27-like protein 2B isoform X4 [Crassostrea gigas]
Unigene0011107	920	184.388	390.717	1.08338	0.00102252	Up	1.25442e-05	NA	NA	NA	K04239//hypocretin (orexin) receptor 2;K04294//lysophosphatidic acid receptor 3;K04194//cholecystokinin A receptor;K04207//neuropeptide Y receptor type 5	gi|762088772|ref|XP_011426712.1|//PREDICTED: cholecystokinin receptor type A-like [Crassostrea gigas]
Unigene0020030	1305	95.4088	220.546	1.20888	0.041207	Up	0.00225695	NA	NA	NA	NA	NA
Unigene0007086	639	15.2803	110.46	2.85377	6.15348e-05	Up	3.50185e-07	NA	NA	NA	NA	NA
Unigene0017069	1900	215.512	2568.16	3.5749	1.26169e-13	Up	1.56438e-16	NA	NA	NA	K00503//dopamine beta-monooxygenase [EC:1.14.17.1]	gi|405973861|gb|EKC38551.1|//Tyramine beta-hydroxylase [Crassostrea gigas]
Unigene0032750	1186	7.19748	35.0302	2.28303	0.0142331	Up	0.000477393	NA	NA	NA	NA	NA
Unigene0007709	432	42.4988	93.9465	1.14442	0.0180741	Up	0.000683799	NA	NA	NA	NA	NA
Unigene0009002	992	201.305	50.2398	-2.00248	8.66407e-12	Down	1.18444e-14	NA	NA	NA	K15266//dimethyladenosine transferase 1, mitochondrial [EC:2.1.1.-];K00503//dopamine beta-monooxygenase [EC:1.14.17.1]	gi|762159681|ref|XP_011418036.1|//PREDICTED: DBH-like monooxygenase protein 1 homolog [Crassostrea gigas]
Unigene0024675	805	92.6612	40.9526	-1.17801	0.020513	Down	0.000818477	NA	NA	NA	NA	gi|405969398|gb|EKC34371.1|//Protein jagged-2 [Crassostrea gigas]
Unigene0012597	332	35.5293	96.4964	1.44147	0.00130855	Up	1.76393e-05	NA	NA	NA	NA	NA
Unigene0030061	464	954.748	423.057	-1.17427	0.000540109	Down	5.59787e-06	NA	NA	NA	NA	gi|762115361|ref|XP_011440488.1|//PREDICTED: uncharacterized protein LOC105337458 [Crassostrea gigas]
Unigene0020986	1182	767.261	222.719	-1.78449	0.000164176	Down	1.14308e-06	NA	NA	NA	K13172//serine/arginine repetitive matrix protein 2;K12172//E3 SUMO-protein ligase RanBP2	gi|762125860|ref|XP_011445968.1|//PREDICTED: spermatogenesis-associated protein 6-like isoform X3 [Crassostrea gigas]
Unigene0026600	679	100.826	269.986	1.42101	0.0446958	Up	0.00253767	NA	NA	NA	K06087//claudin	gi|762152802|ref|XP_011414416.1|//PREDICTED: uncharacterized protein LOC105318828 [Crassostrea gigas]
Unigene0022737	992	505.292	202.614	-1.31839	0.00881617	Down	0.000237585	NA	GO:0046906//tetrapyrrole binding;GO:0051184//cofactor transporter activity	GO:0051181//cofactor transport	K08220//MFS transporter, FLVCR family, feline leukemia virus subgroup C receptor-related protein	gi|762079004|ref|XP_011456933.1|//PREDICTED: feline leukemia virus subgroup C receptor-related protein 2-like isoform X3 [Crassostrea gigas]
Unigene0007091	1361	164.843	347.221	1.07476	0.00105788	Up	1.31167e-05	NA	GO:0003676//nucleic acid binding	GO:0006355//regulation of transcription, DNA-templated	K03145//transcription elongation factor S-II	gi|762151578|ref|XP_011413776.1|//PREDICTED: transcription elongation factor A protein 1-like [Crassostrea gigas]
Unigene0015798	2362	341.585	118.854	-1.52306	0.00171956	Down	2.53664e-05	NA	NA	NA	K10317//F-box protein 42	gi|405971405|gb|EKC36244.1|//hypothetical protein CGI_10024171, partial [Crassostrea gigas]
Unigene0003743	345	4.34671	19.8185	2.18886	0.0121091	Up	0.000374967	NA	NA	NA	NA	NA
Unigene0026111	714	10.8719	48.7325	2.16428	0.00251233	Up	4.22406e-05	NA	NA	NA	NA	gi|762107902|ref|XP_011436570.1|//PREDICTED: sterile alpha motif domain-containing protein 9-like [Crassostrea gigas]
Unigene0004966	451	392.785	117.487	-1.74124	0.00244735	Down	4.04597e-05	NA	NA	NA	NA	NA
Unigene0006705	1195	41.2406	124.189	1.5904	0.000482321	Up	4.79028e-06	NA	NA	NA	NA	NA
Unigene0029004	532	505.99	204.342	-1.30812	0.0101936	Down	0.000294246	GO:0031224//intrinsic component of membrane;GO:0016021//integral component of membrane	GO:0005267//potassium channel activity;GO:0005261//cation channel activity	GO:0034220//ion transmembrane transport;GO:0071805//potassium ion transmembrane transport	K20007//potassium channel subfamily K member 18;K05323//potassium channel subfamily K, invertebrate	gi|405973447|gb|EKC38162.1|//Potassium channel subfamily K member 18 [Crassostrea gigas]
Unigene0021514	1114	31.9295	91.0876	1.51236	0.00309268	Up	5.73229e-05	NA	NA	NA	K20051//low-density lipoprotein receptor-related protein 4;K20053//very low-density lipoprotein receptor	gi|762160822|ref|XP_011418626.1|//PREDICTED: uncharacterized protein LOC105321850 isoform X1 [Crassostrea gigas]
Unigene0010827	319	190.43	436.223	1.19581	0.035518	Up	0.00183044	NA	NA	NA	NA	gi|405952505|gb|EKC20306.1|//Ninjurin-1 [Crassostrea gigas]
Unigene0016791	1987	44.8898	108.339	1.2711	0.00553231	Up	0.000132959	NA	NA	NA	NA	NA
Unigene0030375	411	5231.42	19332.9	1.88579	0.042339	Up	0.00233541	NA	GO:0046872//metal ion binding	NA	NA	gi|762161577|ref|XP_011419017.1|//PREDICTED: teneurin-1-like [Crassostrea gigas]
Unigene0010607	961	40.7636	109.089	1.42015	0.0387163	Up	0.0020601	NA	NA	NA	NA	gi|762086460|ref|XP_011425502.1|//PREDICTED: heat shock 70 kDa protein 12A-like [Crassostrea gigas]
Unigene0015041	2803	149.554	67.198	-1.15417	0.0024866	Down	4.13499e-05	NA	NA	NA	K05840//dopamine receptor D5;K04257//olfactory receptor	gi|762090408|ref|XP_011427584.1|//PREDICTED: cytosolic carboxypeptidase 1-like [Crassostrea gigas]
Unigene0007457	1149	23.8939	113.503	2.24801	0.0037788	Up	7.86093e-05	NA	NA	NA	K19479//collagen, type X, alpha;K19721//collagen, type V/XI/XXIV/XXVII, alpha	gi|762086646|ref|XP_011425602.1|//PREDICTED: collagen alpha-1(VIII) chain-like [Crassostrea gigas]
Unigene0016635	2032	98.3503	42.163	-1.22195	0.0195793	Down	0.000768134	GO:0005634//nucleus;GO:0005849//mRNA cleavage factor complex	GO:0003676//nucleic acid binding	GO:0006397//mRNA processing	K14401//cleavage and polyadenylation specificity factor subunit 1	gi|762128359|ref|XP_011447280.1|//PREDICTED: cleavage and polyadenylation specificity factor subunit 1-like isoform X2 [Crassostrea gigas]
Unigene0024385	840	9.27233	47.7806	2.36542	0.00251233	Up	4.21287e-05	NA	NA	NA	NA	gi|405971081|gb|EKC35937.1|//hypothetical protein CGI_10024346 [Crassostrea gigas]
Unigene0015173	2704	9243.25	2928.22	-1.65837	8.64197e-05	Down	5.30267e-07	NA	NA	NA	K10788//eosinophil peroxidase [EC:1.11.1.7];K19511//peroxidase [EC:1.11.1.7]	gi|762088253|ref|XP_011426440.1|//PREDICTED: eosinophil peroxidase-like isoform X2 [Crassostrea gigas]
Unigene0010713	727	23.8874	66.12	1.46884	0.0121346	Up	0.00037668	NA	NA	NA	NA	NA
Unigene0023487	906	52.2882	169.434	1.69617	0.0287222	Up	0.00130671	NA	NA	NA	NA	NA
Unigene0027314	634	245.788	16.4766	-3.89892	2.26733e-21	Down	1.29751e-24	NA	NA	NA	K14755//carnosine synthase [EC:6.3.2.11]	gi|762149517|ref|XP_011412701.1|//PREDICTED: carnosine synthase 1-like isoform X1 [Crassostrea gigas]
Unigene0022882	977	349.7	1066.77	1.60906	2.44879e-08	Up	6.07254e-11	NA	NA	NA	NA	NA
Unigene0010433	780	161.687	511.287	1.66092	1.97776e-08	Up	4.84159e-11	NA	GO:0005216//ion channel activity	GO:0006811//ion transport;GO:0044765//single-organism transport	K15381//MFS transporter, FLVCR family, disrupted in renal carcinoma protein 2	gi|762142772|ref|XP_011454615.1|//PREDICTED: disrupted in renal carcinoma protein 2 homolog [Crassostrea gigas]
Unigene0024100	867	57.0079	25.7772	-1.14506	0.0408464	Down	0.00222279	NA	NA	NA	K12302//MFS transporter, ACS family, solute carrier family 17 (sodium-dependent inorganic phosphate cotransporter), member 6/7/8	gi|762072648|ref|XP_011431416.1|//PREDICTED: vesicular glutamate transporter 1-like isoform X2 [Crassostrea gigas]
Unigene0017570	1774	1433.58	540.567	-1.40708	0.00369435	Down	7.48172e-05	NA	NA	NA	K05197//glutamate receptor 1	gi|762161294|ref|XP_011418869.1|//PREDICTED: protein SSUH2 homolog [Crassostrea gigas]
Unigene0016545	2067	287.927	648.947	1.1724	0.000219472	Up	1.72346e-06	NA	NA	NA	NA	gi|405959661|gb|EKC25673.1|//Protein yellow [Crassostrea gigas]
Unigene0024632	821	45.7138	94.5358	1.04823	0.0164617	Up	0.000591884	NA	NA	NA	NA	gi|405978661|gb|EKC43031.1|//hypothetical protein CGI_10018014 [Crassostrea gigas]
Unigene0029444	504	3.57223	19.6313	2.45826	0.00675739	Up	0.000168645	NA	NA	NA	NA	gi|405950163|gb|EKC18166.1|//hypothetical protein CGI_10014654 [Crassostrea gigas]
Unigene0000524	386	27.8813	102.49	1.87811	0.0174497	Up	0.000646708	NA	NA	NA	NA	NA
Unigene0012706	391	15.4153	46.727	1.5999	0.0227124	Up	0.000944483	NA	NA	NA	K01125//N-acetylglucosamine-1-phosphodiester alpha-N-acetylglucosaminidase [EC:3.1.4.45];K03264//translation initiation factor 6;K18032//receptor-type tyrosine-protein phosphatase A [EC:3.1.3.48]	gi|762100755|ref|XP_011432837.1|//PREDICTED: uncharacterized protein LOC105332095 [Crassostrea gigas]
Unigene0026053	716	117.985	53.6672	-1.13649	0.00516444	Down	0.000120326	NA	GO:0005488//binding	GO:0044763//single-organism cellular process;GO:0050789//regulation of biological process	K07883//Ras-related protein Rab-3C	gi|762075524|ref|XP_011442652.1|//PREDICTED: circularly permutated Ras protein 1-like isoform X1 [Crassostrea gigas]
Unigene0032888	769	165.619	459.812	1.47318	0.00522841	Up	0.000123118	NA	NA	NA	K04097//prostaglandin-H2 D-isomerase / glutathione transferase [EC:5.3.99.2 2.5.1.18]	gi|762157353|ref|XP_011416827.1|//PREDICTED: S-crystallin SL11-like isoform X2 [Crassostrea gigas]
Unigene0011053	974	39.2445	87.5173	1.15708	0.0277883	Up	0.00124921	NA	NA	NA	NA	gi|405977228|gb|EKC41687.1|//hypothetical protein CGI_10028433 [Crassostrea gigas]
Unigene0018267	1615	65.6196	335.108	2.35243	5.03257e-05	Up	2.73596e-07	NA	NA	NA	NA	gi|762096687|ref|XP_011430887.1|//PREDICTED: uncharacterized protein LOC105330714 [Crassostrea gigas]
Unigene0021173	1158	418.834	185.33	-1.17628	0.0030316	Down	5.57535e-05	NA	NA	NA	K17571//protein phosphatase 1 regulatory subunit 32	gi|762118866|ref|XP_011442327.1|//PREDICTED: protein phosphatase 1 regulatory subunit 32-like isoform X2 [Crassostrea gigas]
Unigene0013426	992	39.4691	151.285	1.93847	0.00102723	Up	1.26414e-05	NA	NA	NA	K02599//Notch 1;K14379//tartrate-resistant acid phosphatase type 5 [EC:3.1.3.2]	gi|762140848|ref|XP_011453604.1|//PREDICTED: uncharacterized protein LOC105346629 isoform X3 [Crassostrea gigas]
Unigene0021984	1067	252.629	88.3837	-1.51517	0.0221825	Down	0.0009161	NA	NA	NA	K05175//gamma-aminobutyric acid receptor subunit alpha;K05181//gamma-aminobutyric acid receptor subunit beta	gi|762137586|ref|XP_011452088.1|//PREDICTED: uncharacterized protein LOC105345598 isoform X1 [Crassostrea gigas]
Unigene0004376	232	74.4797	27.804	-1.42155	0.0109428	Down	0.000324936	NA	GO:0016671//oxidoreductase activity, acting on a sulfur group of donors, disulfide as acceptor	GO:0044710//single-organism metabolic process	K07305//peptide-methionine (R)-S-oxide reductase [EC:1.8.4.12]	gi|762104480|ref|XP_011434779.1|//PREDICTED: methionine-R-sulfoxide reductase B3, mitochondrial-like isoform X1 [Crassostrea gigas]
Unigene0033080	1416	140.666	286.25	1.02501	0.0424398	Up	0.00234367	NA	NA	NA	NA	NA
Unigene0021223	1151	66.4581	167.807	1.33629	0.00099993	Up	1.22075e-05	NA	NA	NA	K11997//tripartite motif-containing protein 2/3;K12021//tripartite motif-containing protein 45	gi|999981147|gb|KXJ20321.1|//Tripartite motif-containing protein 45 [Exaiptasia pallida]
Unigene0030542	344	841.161	3620.03	2.10555	0.0113553	Up	0.000341664	NA	NA	NA	NA	gi|762087319|ref|XP_011425944.1|//PREDICTED: uncharacterized protein LOC105327274 [Crassostrea gigas]
Unigene0004414	220	294.039	92.1546	-1.67388	0.00156878	Down	2.23442e-05	NA	NA	NA	NA	gi|902935879|ref|XP_013055944.1|//PREDICTED: salivary glue protein Sgs-3-like [Anser cygnoides domesticus]
Unigene0021839	1079	328.569	1291.04	1.97426	0.000264883	Up	2.19892e-06	NA	NA	NA	K04804//nicotinic acetylcholine receptor alpha-2;K04811//nicotinic acetylcholine receptor alpha-10;K05312//nicotinic acetylcholine receptor, invertebrate	gi|762111301|ref|XP_011438360.1|//PREDICTED: neuronal acetylcholine receptor subunit alpha-10-like isoform X2 [Crassostrea gigas]
Unigene0001733	264	131.152	60.9082	-1.10654	0.0202398	Down	0.000801768	NA	NA	NA	NA	NA
Unigene0010683	451	162.881	393.19	1.27141	0.0137365	Up	0.000450692	NA	NA	NA	NA	NA
Unigene0016088	2241	4001.31	1405.69	-1.5092	2.39945e-05	Down	1.12138e-07	NA	NA	NA	NA	gi|405951454|gb|EKC19365.1|//Outer dense fiber protein 3 [Crassostrea gigas]
Unigene0006650	1320	948.505	390.988	-1.27853	5.22654e-05	Down	2.90788e-07	NA	NA	NA	K16600//tubulin polyglutamylase TTLL2 [EC:6.-.-.-]	gi|762076014|ref|XP_011445305.1|//PREDICTED: protein unc-93 homolog A-like isoform X3 [Crassostrea gigas]
Unigene0014432	3397	1383.08	685.096	-1.01351	0.000264883	Down	2.2148e-06	NA	NA	NA	K20478//golgin subfamily B member 1	gi|762149684|ref|XP_011412785.1|//PREDICTED: coiled-coil domain-containing protein 146-like [Crassostrea gigas]
Unigene0014137	3809	1106.59	543.144	-1.02671	0.00280155	Down	4.96109e-05	NA	NA	NA	K20282//GRIP and coiled-coil domain-containing protein 2;K09291//nucleoprotein TPR;K11499//centromere protein F;K20478//golgin subfamily B member 1	gi|762087936|ref|XP_011426273.1|//PREDICTED: axonemal dynein light chain domain-containing protein 1-like isoform X1 [Crassostrea gigas]
Unigene0007256	1225	2480.22	1231.23	-1.01036	0.000690201	Down	7.70608e-06	NA	NA	NA	NA	gi|762124776|ref|XP_011445408.1|//PREDICTED: protein FAM166B-like [Crassostrea gigas]
Unigene0004339	1014	32.346	80.7745	1.32031	0.00522045	Up	0.000122155	NA	NA	NA	NA	NA
Unigene0023604	904	15.789	47.1311	1.57776	0.0255144	Up	0.00111232	NA	NA	NA	NA	gi|762138775|ref|XP_011452721.1|//PREDICTED: hemicentin-1-like [Crassostrea gigas]
Unigene0028726	548	15.9405	48.4123	1.60267	0.0170367	Up	0.000624171	NA	NA	NA	NA	gi|405951331|gb|EKC19253.1|//hypothetical protein CGI_10009106 [Crassostrea gigas]
Unigene0010501	262	17.8197	49.9274	1.48636	0.0179497	Up	0.000677378	NA	NA	NA	NA	NA
Unigene0001663	591	83.3275	204.825	1.29753	0.000230239	Up	1.85192e-06	NA	NA	NA	NA	NA
Unigene0001140	901	5.29202	35.1372	2.73111	0.000114257	Up	7.33681e-07	NA	NA	NA	NA	NA
Unigene0012666	518	17.4229	257.174	3.88369	5.0192e-15	Up	4.94676e-18	NA	NA	NA	NA	gi|762147908|ref|XP_011411876.1|//PREDICTED: complement C1q tumor necrosis factor-related protein 4-like [Crassostrea gigas]
Unigene0020151	1289	3611.33	1678.99	-1.10493	0.00175118	Down	2.59999e-05	NA	GO:0005515//protein binding;GO:0051082//unfolded protein binding	GO:0044267//cellular protein metabolic process;GO:0006457//protein folding;GO:0050896//response to stimulus	K09519//DnaJ homolog subfamily B member 13	gi|405952218|gb|EKC20056.1|//DnaJ-like protein subfamily B member 13 [Crassostrea gigas]
Unigene0023334	910	7.06457	24.4234	1.78959	0.0452948	Up	0.0025863	GO:0016020//membrane	NA	NA	K01562//type I thyroxine 5'-deiodinase [EC:1.21.99.4]	gi|817050469|gb|AKF17656.1|//iodothyronine deiodinase [Crassostrea gigas]
Unigene0031051	565	20.3028	87.2787	2.10395	1.43166e-05	Up	6.19017e-08	NA	NA	NA	NA	NA
Unigene0012856	345	7.18841	171.037	4.5725	1.0815e-15	Up	9.9712e-19	NA	NA	NA	NA	NA
Unigene0005791	538	188.896	38.3198	-2.30143	0.00108948	Down	1.35467e-05	NA	NA	NA	NA	gi|762096951|ref|XP_011431029.1|//PREDICTED: uncharacterized protein LOC105330813 [Crassostrea gigas]
Unigene0001808	202	6.73342	83.4005	3.63065	3.36035e-10	Up	5.44853e-13	NA	NA	NA	NA	NA
Unigene0029764	488	29.9143	70.2984	1.23266	0.035678	Up	0.00184096	NA	NA	NA	NA	NA
Unigene0024777	813	58.6361	135.188	1.20511	0.00152375	Up	2.16059e-05	NA	NA	NA	NA	gi|762148947|ref|XP_011412399.1|//PREDICTED: uncharacterized protein LOC105317455 [Crassostrea gigas]
Unigene0025816	726	176.687	84.8842	-1.05763	0.00758313	Down	0.000195762	NA	NA	NA	K14445//solute carrier family 13 (sodium-dependent dicarboxylate transporter), member 2/3/5	gi|762086919|ref|XP_011425741.1|//PREDICTED: solute carrier family 13 member 5-like isoform X3 [Crassostrea gigas]
Unigene0026337	696	131.506	612.32	2.21916	0.00027472	Up	2.30578e-06	NA	NA	NA	NA	gi|405978242|gb|EKC42648.1|//hypothetical protein CGI_10013277 [Crassostrea gigas]
Unigene0019069	1453	93.9611	34.0148	-1.4659	0.00376941	Down	7.77257e-05	NA	NA	NA	K07977//Arf/Sar family, other;K07939//ADP-ribosylation factor 4	gi|762088560|ref|XP_011426602.1|//PREDICTED: ADP-ribosylation factor-like [Crassostrea gigas]
Unigene0012577	331	36.3021	12.9933	-1.48229	0.0456151	Down	0.00260749	GO:0043231//intracellular membrane-bounded organelle;GO:0044444//cytoplasmic part	GO:0043169//cation binding;GO:0016301//kinase activity;GO:0008531//riboflavin kinase activity;GO:0032550//purine ribonucleoside binding	GO:0016310//phosphorylation;GO:0009108//coenzyme biosynthetic process;GO:0006771//riboflavin metabolic process;GO:0009231//riboflavin biosynthetic process	K00861//riboflavin kinase [EC:2.7.1.26]	gi|762102430|ref|XP_011433707.1|//PREDICTED: riboflavin kinase-like [Crassostrea gigas]
Unigene0018783	1509	731.999	287.02	-1.35069	5.18248e-08	Down	1.33459e-10	NA	NA	NA	NA	gi|762150470|ref|XP_011413191.1|//PREDICTED: uncharacterized protein LOC105318029 [Crassostrea gigas]
Unigene0026598	678	63.1158	170.053	1.42991	0.0322577	Up	0.00158345	NA	NA	NA	NA	gi|762082951|ref|XP_011424168.1|//PREDICTED: uncharacterized protein LOC105326039 [Crassostrea gigas]
Unigene0020612	1227	81.7839	229.957	1.49147	0.00305071	Up	5.63509e-05	NA	NA	NA	NA	gi|762143961|ref|XP_011455244.1|//PREDICTED: uncharacterized protein LOC105347749 isoform X2 [Crassostrea gigas]
Unigene0014431	3396	199.177	30.0093	-2.73057	1.09646e-17	Down	8.36618e-21	NA	NA	NA	K14755//carnosine synthase [EC:6.3.2.11]	gi|762139004|ref|XP_011452840.1|//PREDICTED: carnosine synthase 1-like [Crassostrea gigas]
Unigene0007078	1063	323.759	142.133	-1.18768	0.0399711	Down	0.00215524	GO:0044424//intracellular part;GO:0005737//cytoplasm	GO:0005524//ATP binding;GO:0005515//protein binding;GO:0051082//unfolded protein binding;GO:0032550//purine ribonucleoside binding	GO:0006457//protein folding;GO:0044267//cellular protein metabolic process;GO:0030534//adult behavior	K09500//T-complex protein 1 subunit theta	gi|405961548|gb|EKC27336.1|//T-complex protein 1 subunit theta [Crassostrea gigas]
Unigene0004001	411	38.5262	159.42	2.04892	0.000262219	Up	2.16751e-06	NA	NA	NA	K16060//baculoviral IAP repeat-containing protein 2/3	gi|762149958|ref|XP_011412926.1|//PREDICTED: baculoviral IAP repeat-containing protein 7-A-like [Crassostrea gigas]
Unigene0018742	1507	35.3206	95.0479	1.42815	0.000590137	Up	6.22895e-06	NA	NA	NA	NA	gi|762087278|ref|XP_011425923.1|//PREDICTED: uncharacterized protein LOC105327265 [Crassostrea gigas]
Unigene0026555	674	29.1723	7.71301	-1.91924	0.0236684	Down	0.000994021	NA	NA	NA	K00503//dopamine beta-monooxygenase [EC:1.14.17.1]	gi|405973861|gb|EKC38551.1|//Tyramine beta-hydroxylase [Crassostrea gigas]
Unigene0000060	792	123.77	347.472	1.48924	0.0168492	Up	0.00061228	NA	NA	NA	NA	NA
Unigene0029570	496	6.97567	70.5278	3.33779	5.46489e-09	Up	1.18145e-11	NA	NA	NA	NA	gi|405966921|gb|EKC32148.1|//hypothetical protein CGI_10022179 [Crassostrea gigas]
Unigene0006693	582	96.3966	37.2352	-1.37232	0.012962	Down	0.000417864	NA	NA	NA	K00972//UDP-N-acetylglucosamine/UDP-N-acetylgalactosamine diphosphorylase [EC:2.7.7.23 2.7.7.83]	gi|762098429|ref|XP_011431607.1|//PREDICTED: UDP-N-acetylhexosamine pyrophosphorylase-like isoform X3 [Crassostrea gigas]
Unigene0024482	834	43.981	104.185	1.24419	0.0427216	Up	0.00236693	NA	NA	NA	K10405//kinesin family member C1;K05544//tRNA-dihydrouridine synthase 3 [EC:1.3.1.89]	gi|762073627|ref|XP_011434710.1|//PREDICTED: uncharacterized protein LOC105333432 [Crassostrea gigas]
Unigene0007227	1388	1464.26	687.042	-1.0917	0.0219152	Down	0.000898097	NA	GO:0048037//cofactor binding;GO:0050662//coenzyme binding;GO:0016491//oxidoreductase activity;GO:0036094//small molecule binding	GO:0009226//nucleotide-sugar biosynthetic process;GO:0008152//metabolic process;GO:0055114//oxidation-reduction process	K02377//GDP-L-fucose synthase [EC:1.1.1.271]	gi|762072670|ref|XP_011431525.1|//PREDICTED: GDP-L-fucose synthase-like [Crassostrea gigas]
Unigene0029725	490	889.352	315.192	-1.49652	0.015719	Down	0.000552582	NA	NA	NA	NA	gi|405951955|gb|EKC19819.1|//hypothetical protein CGI_10007476 [Crassostrea gigas]
Unigene0017399	1811	313.4	694.721	1.14843	0.0177076	Up	0.000659325	NA	NA	NA	K17776//metaxin	gi|762077195|ref|XP_011449508.1|//PREDICTED: failed axon connections homolog [Crassostrea gigas]
Unigene0029110	527	19.1258	70.172	1.87537	0.00570288	Up	0.000137613	NA	NA	NA	NA	gi|762146783|ref|XP_011456688.1|//PREDICTED: uncharacterized protein LOC105348822 [Crassostrea gigas]
Unigene0011423	829	15.5145	42.2843	1.44651	0.0299292	Up	0.00141264	NA	NA	NA	NA	NA
Unigene0019862	1330	332.445	151.78	-1.13113	0.00069481	Down	7.79767e-06	NA	NA	NA	K05141//tumor necrosis factor receptor superfamily member 1B;K02583//nerve growth factor receptor (TNFR superfamily member 16)	gi|762070796|ref|XP_011423120.1|//PREDICTED: mucin-5AC-like [Crassostrea gigas]
Unigene0029078	524	13.2451	36.6558	1.46858	0.0250182	Up	0.00108014	NA	NA	NA	NA	NA
Unigene0026086	715	138.643	18.5194	-2.90426	1.12856e-05	Down	4.70025e-08	NA	NA	NA	K17495//CUB and sushi domain-containing protein;K02599//Notch 1	gi|762137119|ref|XP_011451848.1|//PREDICTED: sushi, von Willebrand factor type A, EGF and pentraxin domain-containing protein 1-like [Crassostrea gigas]
Unigene0002445	804	171.847	74.8808	-1.19846	0.0109173	Down	0.000323139	NA	NA	GO:0007165//signal transduction	K04729//myeloid differentiation primary response protein MyD88	gi|765826367|ref|NP_001292286.1|//myeloid differentiation primary response protein MyD88-like [Crassostrea gigas]
Unigene0010372	1176	198.729	578.487	1.54148	0.00125057	Up	1.65397e-05	NA	NA	NA	K17273//Fc receptor-like protein 6;K06467//CD22 antigen;K17341//hemicentin;K06499//carcinoembryonic antigen-related cell adhesion molecule	gi|762141440|ref|XP_011453906.1|//PREDICTED: uncharacterized protein LOC105346857 [Crassostrea gigas]
Unigene0015353	2563	66.3174	253.956	1.93712	0.00294081	Up	5.34795e-05	NA	NA	NA	K00108//choline dehydrogenase [EC:1.1.99.1];K01273//membrane dipeptidase [EC:3.4.13.19];K12852//116 kDa U5 small nuclear ribonucleoprotein component;K12354//ectonucleotide pyrophosphatase/phosphodiesterase family member 7 [EC:3.1.4.12];K04911//potassium voltage-gated channel Eag-related subfamily H member 8	gi|585706911|ref|XP_006823893.1|//PREDICTED: RNA-directed DNA polymerase from mobile element jockey-like, partial [Saccoglossus kowalevskii]
Unigene0014155	3771	48.5525	15.7672	-1.62262	0.0072331	Down	0.000184426	NA	GO:1901363//heterocyclic compound binding;GO:0097159//organic cyclic compound binding;GO:0017111//nucleoside-triphosphatase activity;GO:0036094//small molecule binding	GO:0006928//movement of cell or subcellular component	K10414//dynein heavy chain 2, cytosolic	gi|762095937|ref|XP_011430487.1|//PREDICTED: cytoplasmic dynein 2 heavy chain 1-like isoform X5 [Crassostrea gigas]
Unigene0019999	1312	24.6764	73.8272	1.58102	0.00416211	Up	8.94508e-05	NA	NA	NA	NA	gi|676496132|ref|XP_009067114.1|//hypothetical protein LOTGIDRAFT_237103 [Lottia gigantea]
Unigene0016915	1949	606.984	234.651	-1.37114	0.00706176	Down	0.000178037	NA	NA	NA	K00942//guanylate kinase [EC:2.7.4.8]	gi|762080305|ref|XP_011416265.1|//PREDICTED: leucine-rich repeat and guanylate kinase domain-containing protein-like [Crassostrea gigas]
Unigene0009368	779	6.59255	22.4798	1.76972	0.040348	Up	0.0021807	NA	NA	NA	NA	gi|762128312|ref|XP_011447257.1|//PREDICTED: DNA repair protein RAD50-like [Crassostrea gigas]
Unigene0021960	1070	75.2036	165.026	1.13381	0.00463681	Up	0.000103633	NA	NA	NA	NA	NA
Unigene0005581	1169	1463.03	603.977	-1.2764	0.0054447	Down	0.000130172	NA	NA	NA	NA	NA
Unigene0009851	1517	4321.96	1739.28	-1.3132	0.00102723	Down	1.26714e-05	NA	NA	NA	K18630//tektin-3	gi|762135470|ref|XP_011450985.1|//PREDICTED: tektin-3-like isoform X3 [Crassostrea gigas]
Unigene0014533	3279	114.624	44.8575	-1.35348	0.0032657	Down	6.22329e-05	NA	NA	NA	K10408//dynein heavy chain, axonemal	gi|762133190|ref|XP_011449792.1|//PREDICTED: dynein beta chain, ciliary-like isoform X4 [Crassostrea gigas]
Unigene0010974	636	175.844	63.6907	-1.46514	0.00246289	Down	4.08245e-05	NA	NA	GO:0008152//metabolic process	K11154//retinol dehydrogenase 16 [EC:1.1.1.-]	gi|405971241|gb|EKC36087.1|//Retinol dehydrogenase 2 [Crassostrea gigas]
Unigene0013607	5741	1360.31	579.001	-1.23229	0.000437806	Down	4.23136e-06	NA	NA	NA	K17570//hydrocephalus-inducing protein	gi|762082067|ref|XP_011423487.1|//PREDICTED: coiled-coil domain-containing protein 108-like isoform X1 [Crassostrea gigas]
Unigene0010475	1101	33.0024	88.8196	1.42831	0.0092606	Up	0.000257026	NA	NA	NA	NA	NA
Unigene0022341	1033	111868	48124.1	-1.21696	0.00953817	Down	0.000268369	NA	NA	NA	K19719//collagen, type II, alpha;K19721//collagen, type V/XI/XXIV/XXVII, alpha	gi|405972828|gb|EKC37576.1|//Collagen alpha-5(VI) chain [Crassostrea gigas]
Unigene0015714	2421	21.6071	113.997	2.39942	2.87315e-05	Up	1.36103e-07	NA	NA	NA	K05209//glutamate receptor ionotropic, NMDA 2A;K05665//ATP-binding cassette, subfamily C (CFTR/MRP), member 1;K08029//homeobox protein Nkx-2.2;K05769//Rho guanine nucleotide exchange factor 4/29;K17601//WD repeat-containing protein 81	gi|762166442|ref|XP_011421530.1|//PREDICTED: uncharacterized protein K02A2.6-like [Crassostrea gigas]
Unigene0012268	415	1347.13	538.775	-1.32213	0.0018563	Down	2.82688e-05	NA	NA	NA	NA	NA
Unigene0001338	664	470.206	234.084	-1.00627	0.0221568	Down	0.000912221	NA	NA	NA	K10352//myosin heavy chain	gi|762160914|ref|XP_011418673.1|//PREDICTED: uncharacterized protein LOC105321886 [Crassostrea gigas]
Unigene0002137	285	143.712	290.712	1.01641	0.0194036	Up	0.000757306	NA	NA	NA	NA	NA
Unigene0001933	349	28.4095	73.9522	1.38022	0.029652	Up	0.00139217	NA	NA	NA	NA	NA
Unigene0009205	554	69.3485	23.8973	-1.53702	0.0124961	Down	0.000394643	NA	NA	NA	NA	gi|405961877|gb|EKC27616.1|//hypothetical protein CGI_10017123 [Crassostrea gigas]
Unigene0027349	632	651.192	294.09	-1.14682	0.000141991	Down	9.66046e-07	NA	NA	NA	NA	NA
Unigene0019146	1445	121.605	349.419	1.52275	0.000100361	Up	6.28571e-07	NA	NA	NA	K04284//growth hormone secretagogue receptor;K04216//nociceptin receptor;K04215//mu-type opioid receptor;K08430//G protein-coupled receptor 142	gi|405978047|gb|EKC42463.1|//FMRFamide receptor [Crassostrea gigas]
Unigene0009487	1821	114.858	297.904	1.37499	0.0154456	Up	0.000533774	NA	NA	NA	NA	gi|762080850|ref|XP_011419251.1|//PREDICTED: uncharacterized protein LOC105322306 [Crassostrea gigas]
Unigene0010899	345	38.4999	7.68609	-2.32453	0.00734201	Down	0.000188604	NA	NA	NA	NA	gi|762089793|ref|XP_011427252.1|//PREDICTED: uncharacterized protein LOC105328182 [Crassostrea gigas]
Unigene0031072	1174	197.531	82.8432	-1.25363	0.0120864	Down	0.000373246	NA	NA	NA	K07611//lamin B	gi|405954851|gb|EKC22176.1|//Intermediate filament tail domain-containing protein 1 [Crassostrea gigas]
Unigene0008984	2243	89.5188	185.858	1.05394	0.0197846	Up	0.000780589	NA	NA	NA	NA	gi|762101778|ref|XP_011433378.1|//PREDICTED: uncharacterized protein LOC105332461 isoform X2 [Crassostrea gigas]
Unigene0013052	337	8.04923	76.8193	3.25455	2.0714e-07	Up	6.05865e-10	NA	NA	NA	K01050//cholinesterase [EC:3.1.1.8]	gi|762077230|ref|XP_011449674.1|//PREDICTED: carboxylesterase 1C-like [Crassostrea gigas]
Unigene0002483	4496	180.894	418.421	1.20981	0.000190397	Up	1.44671e-06	NA	NA	NA	K17495//CUB and sushi domain-containing protein	gi|762168784|ref|XP_011422778.1|//PREDICTED: sushi, von Willebrand factor type A, EGF and pentraxin domain-containing protein 1-like [Crassostrea gigas]
Unigene0006959	2254	80.2944	32.5213	-1.30391	0.0231392	Down	0.000967382	NA	NA	NA	K15503//serine/threonine-protein phosphatase 6 regulatory ankyrin repeat subunit B	gi|762098352|ref|XP_011431567.1|//PREDICTED: transient receptor potential cation channel subfamily A member 1 homolog [Crassostrea gigas]
Unigene0014365	3471	103.54	43.3497	-1.2561	0.0470805	Down	0.00272568	NA	NA	NA	NA	gi|762125885|ref|XP_011445981.1|//PREDICTED: pecanex-like protein 4 [Crassostrea gigas]
Unigene0009354	506	118.468	237.808	1.0053	0.0195478	Up	0.000766276	NA	NA	NA	K15116//solute carrier family 25, member 33/36	gi|405945561|gb|EKC17383.1|//Solute carrier family 25 member 36 [Crassostrea gigas]
Unigene0024245	842	13.223	63.8115	2.27077	0.00580235	Up	0.000140198	NA	NA	NA	NA	gi|919060192|ref|XP_013411821.1|//PREDICTED: uncharacterized protein LOC106174705 [Lingula anatina]
Unigene0003142	2594	959.411	274.832	-1.8036	1.05097e-07	Down	2.84009e-10	GO:0005737//cytoplasm	GO:0004350//glutamate-5-semialdehyde dehydrogenase activity;GO:0004349//glutamate 5-kinase activity	GO:0006561//proline biosynthetic process;GO:0016310//phosphorylation;GO:0055114//oxidation-reduction process	K12657//delta-1-pyrroline-5-carboxylate synthetase [EC:2.7.2.11 1.2.1.41]	gi|961098497|ref|XP_014774552.1|//PREDICTED: delta-1-pyrroline-5-carboxylate synthase-like isoform X2 [Octopus bimaculoides]
Unigene0008632	790	16.39	76.5443	2.22348	0.0129095	Up	0.00041494	NA	NA	NA	NA	NA
Unigene0024941	798	414.263	173.158	-1.25846	0.00430501	Down	9.33431e-05	NA	NA	NA	K15032//mTERF domain-containing protein, mitochondrial	gi|762131616|ref|XP_011448980.1|//PREDICTED: coiled-coil domain-containing protein 33-like isoform X4 [Crassostrea gigas]
Unigene0005977	771	25.6961	118.177	2.20133	1.57963e-09	Up	3.01323e-12	NA	NA	NA	NA	gi|762117016|ref|XP_011441355.1|//PREDICTED: uncharacterized protein LOC105338076 [Crassostrea gigas]
Unigene0029046	528	8.10066	33.0991	2.03068	0.00434082	Up	9.54249e-05	NA	NA	NA	NA	NA
Unigene0030204	444	18501.4	4728.79	-1.96809	0.000228974	Down	1.82719e-06	NA	NA	NA	NA	NA
Unigene0028394	569	20.3581	98.6717	2.27703	0.00492817	Up	0.000112809	NA	NA	NA	K03986//complement C1q subcomponent subunit A;K18744//caprin-2	gi|405951353|gb|EKC19273.1|//Cerebellin-1 [Crassostrea gigas]
Unigene0021083	1170	191.494	429.251	1.16452	0.00475011	Up	0.000107103	NA	NA	NA	NA	gi|405972019|gb|EKC36816.1|//hypothetical protein CGI_10022767 [Crassostrea gigas]
Unigene0012031	395	354.595	1567.77	2.14446	9.70238e-09	Up	2.31347e-11	NA	NA	NA	NA	gi|762167211|ref|XP_011421928.1|//PREDICTED: perlucin-like protein [Crassostrea gigas]
Unigene0006095	210	4.67692	18.4505	1.98003	0.0329143	Up	0.00163114	NA	NA	NA	NA	NA
Unigene0022870	978	337.77	692.173	1.03509	0.0365858	Up	0.00190292	NA	NA	NA	K02175//putative enzyme (brainiac)	gi|762168958|ref|XP_011422868.1|//PREDICTED: beta-1,3-galactosyltransferase 5-like isoform X3 [Crassostrea gigas]
Unigene0011594	530	468.761	194.234	-1.27106	0.00211486	Down	3.36856e-05	NA	NA	NA	NA	gi|762110274|ref|XP_011437822.1|//PREDICTED: uncharacterized protein LOC105335571 [Crassostrea gigas]
Unigene0005380	1340	54.4443	239.208	2.13541	0.000524496	Up	5.40271e-06	NA	NA	NA	NA	NA
Unigene0008199	2772	44.4387	156.726	1.81836	0.00797841	Up	0.000207996	NA	NA	NA	K13912//deleted in malignant brain tumors 1 protein	gi|762155473|ref|XP_011415840.1|//PREDICTED: uncharacterized protein LOC105319839 [Crassostrea gigas]
Unigene0019926	1321	43.2624	14.9018	-1.53763	0.0124846	Down	0.000393742	NA	NA	NA	NA	NA
Unigene0005650	214	8.57377	2.01342	-2.09028	0.0290686	Down	0.00134011	NA	NA	NA	NA	gi|762141498|ref|XP_011453937.1|//PREDICTED: uncharacterized protein LOC105346885 [Crassostrea gigas]
Unigene0021772	1087	328.688	142.487	-1.20588	0.00652966	Down	0.000161508	NA	NA	NA	K15032//mTERF domain-containing protein, mitochondrial;K16476//ninein	gi|762131616|ref|XP_011448980.1|//PREDICTED: coiled-coil domain-containing protein 33-like isoform X4 [Crassostrea gigas]
Unigene0011946	477	148.074	66.0469	-1.16475	0.0124846	Down	0.000393734	NA	NA	NA	NA	NA
Unigene0021678	1095	307.016	134.655	-1.18904	0.0150824	Down	0.000512591	NA	NA	NA	NA	gi|405970539|gb|EKC35435.1|//Uncharacterized protein C13orf26-like protein [Crassostrea gigas]
Unigene0017663	1751	182.249	66.5287	-1.45386	0.00110781	Down	1.39471e-05	NA	NA	NA	K06774//neurotrimin;K06773//opioid binding protein/cell adhesion molecule-like;K06775//neuronal growth regulator 1	gi|762080485|ref|XP_011417286.1|//PREDICTED: limbic system-associated membrane protein-like isoform X2 [Crassostrea gigas]
Unigene0002684	879	141.291	34.9106	-2.01694	0.00952202	Down	0.000267612	NA	NA	NA	K18709//speckle targeted PIP5K1A-regulated poly(A) polymerase [EC:2.7.7.19 2.7.7.52]	gi|405976062|gb|EKC40583.1|//Poly(A) RNA polymerase, mitochondrial [Crassostrea gigas]
Unigene0001831	802	34.7567	85.9718	1.30657	0.0037788	Up	7.83301e-05	NA	NA	NA	NA	NA
Unigene0018004	1669	243.711	114.859	-1.08531	0.0248453	Down	0.00106952	GO:0005578//proteinaceous extracellular matrix	GO:0005488//binding	GO:0044763//single-organism cellular process;GO:0016043//cellular component organization;GO:0009653//anatomical structure morphogenesis;GO:0048513//animal organ development;GO:0009888//tissue development;GO:0044767//single-organism developmental process	K19721//collagen, type V/XI/XXIV/XXVII, alpha	gi|762161267|ref|XP_011418855.1|//PREDICTED: collagen alpha-1(III) chain-like [Crassostrea gigas]
Unigene0023059	957	44.7789	9.8561	-2.18373	0.0207855	Down	0.000833957	NA	NA	NA	K02183//calmodulin	gi|762117760|ref|XP_011441745.1|//PREDICTED: calmodulin-like [Crassostrea gigas]
Unigene0005895	208	41.2718	9.20812	-2.16418	0.000591776	Down	6.31082e-06	NA	NA	NA	NA	NA
Unigene0012973	294	2.22913	9.0023	2.01381	0.0387163	Up	0.00206173	NA	NA	NA	K13912//deleted in malignant brain tumors 1 protein	gi|762128312|ref|XP_011447257.1|//PREDICTED: DNA repair protein RAD50-like [Crassostrea gigas]
Unigene0003060	3685	179.627	547.289	1.6073	4.81492e-08	Up	1.20932e-10	NA	NA	NA	K03283//heat shock 70kDa protein 1/8	gi|405967492|gb|EKC32646.1|//hypothetical protein CGI_10011461 [Crassostrea gigas]
Unigene0000945	1028	53.9065	124.643	1.20927	0.0214373	Up	0.000871013	NA	NA	NA	K05693//receptor-type tyrosine-protein phosphatase mu [EC:3.1.3.48]	NA
Unigene0017007	1920	10146.6	4972.53	-1.02894	0.0121997	Down	0.0003801	NA	GO:0003824//catalytic activity	GO:0006596//polyamine biosynthetic process	K01581//ornithine decarboxylase [EC:4.1.1.17]	gi|762152246|ref|XP_011414121.1|//PREDICTED: ornithine decarboxylase-like isoform X1 [Crassostrea gigas]
Unigene0023308	932	121.166	55.9957	-1.1136	0.0228549	Down	0.000951138	NA	NA	NA	K06238//collagen, type VI, alpha;K02599//Notch 1	gi|762114863|ref|XP_011440226.1|//PREDICTED: cartilage matrix protein-like [Crassostrea gigas]
Unigene0026593	680	137.51	52.7713	-1.38171	0.00280057	Down	4.95045e-05	NA	NA	NA	NA	gi|762147163|ref|XP_011456886.1|//PREDICTED: uncharacterized protein KIAA1467 homolog [Crassostrea gigas]
Unigene0021385	1133	13.8906	39.3648	1.5028	0.0268803	Up	0.00119489	NA	NA	NA	K04239//hypocretin (orexin) receptor 2;K04294//lysophosphatidic acid receptor 3;K04194//cholecystokinin A receptor;K04282//thyrotropin-releasing hormone receptor	gi|405951138|gb|EKC19077.1|//hypothetical protein CGI_10009766 [Crassostrea gigas]
Unigene0021920	1073	265.533	768.493	1.53314	0.00176551	Up	2.62821e-05	NA	NA	NA	NA	gi|762084602|ref|XP_011424797.1|//PREDICTED: uncharacterized protein LOC105326445 isoform X2 [Crassostrea gigas]
Unigene0008499	2757	2563.89	1208.88	-1.08466	0.00327561	Down	6.25879e-05	NA	NA	NA	K05637//laminin, alpha 1/2	gi|405957005|gb|EKC23244.1|//hypothetical protein CGI_10020924 [Crassostrea gigas]
Unigene0007233	1344	2998.82	1402.24	-1.09667	0.043948	Down	0.00247587	NA	NA	NA	K17233//dual oxidase maturation factor 1	gi|762152461|ref|XP_011414235.1|//PREDICTED: dual oxidase maturation factor 1-like isoform X2 [Crassostrea gigas]
Unigene0009250	1123	302.951	132.066	-1.19782	0.00219662	Down	3.54767e-05	NA	NA	NA	NA	gi|762168449|ref|XP_011422600.1|//PREDICTED: uncharacterized protein LOC105324989 isoform X3 [Crassostrea gigas]
Unigene0005616	1188	173.736	78.799	-1.14065	0.0334831	Down	0.0016798	NA	NA	NA	NA	NA
Unigene0023413	927	726.629	54.0221	-3.7496	1.41901e-11	Down	2.03012e-14	NA	NA	NA	K10405//kinesin family member C1	gi|762071039|ref|XP_011424996.1|//PREDICTED: uncharacterized protein LOC105326565 [Crassostrea gigas]
Unigene0027982	589	15.8936	72.4961	2.18945	0.00884078	Up	0.000239472	NA	NA	NA	NA	NA
Unigene0011114	548	149.984	13.9459	-3.4269	1.44034e-12	Down	1.83168e-15	NA	NA	NA	NA	NA
Unigene0009163	1156	43.6656	13.8344	-1.65824	0.0193161	Down	0.000751051	NA	NA	NA	NA	gi|762156526|ref|XP_011416393.1|//PREDICTED: UPF0454 protein C12orf49 homolog [Crassostrea gigas]
Unigene0024370	840	64.129	23.9905	-1.41852	0.019477	Down	0.000762261	GO:0033269//internode region of axon;GO:0005929//cilium;GO:0070062//extracellular exosome;GO:0005634//nucleus;GO:0005874//microtubule;GO:0043209//myelin sheath;GO:0005737//cytoplasm;GO:0043025//neuronal cell body	GO:0005525//GTP binding;GO:0005200//structural constituent of cytoskeleton;GO:0003924//GTPase activity	GO:0007017//microtubule-based process	K07375//tubulin beta	gi|998725053|ref|XP_015500572.1|//PREDICTED: tubulin beta-4B chain isoform X1 [Parus major]
Unigene0028889	531	7.00491	25.0474	1.83822	0.0128503	Up	0.000412219	NA	NA	NA	NA	NA
Unigene0019954	1313	29.7514	84.5571	1.50697	0.0210995	Up	0.000851924	NA	GO:0043565//sequence-specific DNA binding;GO:0003700//transcription factor activity, sequence-specific DNA binding	GO:0006355//regulation of transcription, DNA-templated	NA	gi|762114196|ref|XP_011439871.1|//PREDICTED: cyclic AMP-dependent transcription factor ATF-3-like [Crassostrea gigas]
Unigene0014278	3606	2907.49	1322.15	-1.13689	0.00431593	Down	9.43398e-05	NA	NA	NA	K10056//junction plakoglobin	gi|762136719|ref|XP_011451643.1|//PREDICTED: armadillo repeat-containing protein 4-like isoform X2 [Crassostrea gigas]
Unigene0002538	363	1285.59	477.87	-1.42774	0.000186357	Down	1.37101e-06	NA	NA	NA	NA	gi|762075498|ref|XP_011442493.1|//PREDICTED: uncharacterized protein LOC105338894 [Crassostrea gigas]
Unigene0024024	873	100.539	241.629	1.26504	0.000899009	Up	1.07467e-05	NA	NA	NA	K04261//prostaglandin E receptor 4	gi|762099388|ref|XP_011432117.1|//PREDICTED: prostaglandin E2 receptor EP4 subtype-like [Crassostrea gigas]
Unigene0012309	576	120.338	45.0074	-1.41886	0.0184409	Down	0.000706156	GO:0005622//intracellular	GO:0004198//calcium-dependent cysteine-type endopeptidase activity;GO:0008233//peptidase activity	GO:0006508//proteolysis	K08574//calpain-5 [EC:3.4.22.-]	gi|762144709|ref|XP_011455620.1|//PREDICTED: calpain-5-like isoform X2 [Crassostrea gigas]
Unigene0028808	544	16.5753	123.737	2.90017	5.60483e-09	Up	1.22952e-11	NA	NA	NA	NA	NA
Unigene0006916	1716	388.946	1007.13	1.37261	0.00512325	Up	0.000118414	NA	NA	NA	K06238//collagen, type VI, alpha	gi|762147446|ref|XP_011457036.1|//PREDICTED: cartilage matrix protein-like [Crassostrea gigas]
Unigene0029024	529	14.9288	49.6103	1.73254	0.0202409	Up	0.000802497	NA	NA	NA	K02183//calmodulin	gi|762161383|ref|XP_011418916.1|//PREDICTED: calmodulin-like [Crassostrea gigas]
Unigene0002174	3625	939.282	384.797	-1.28746	0.00732951	Down	0.000187586	NA	NA	NA	NA	gi|762078874|ref|XP_011456241.1|//PREDICTED: sperm-associated antigen 17-like isoform X9 [Crassostrea gigas]
Unigene0020751	1203	74.9468	186.52	1.31539	0.00207728	Up	3.28888e-05	NA	NA	NA	K14801//pre-rRNA-processing protein TSR4;K11847//ubiquitin carboxyl-terminal hydrolase 19 [EC:3.4.19.12];K17656//mitochondrial splicing suppressor protein 51;K09592//hypoxia-inducible factor prolyl hydroxylase [EC:1.14.11.29]	gi|762122477|ref|XP_011444190.1|//PREDICTED: uncharacterized protein LOC105340054 [Crassostrea gigas]
Unigene0026957	657	315.93	756.195	1.25915	0.00599429	Up	0.000145921	NA	NA	NA	NA	gi|762156321|ref|XP_011416287.1|//PREDICTED: macrophage-expressed gene 1 protein-like [Crassostrea gigas]
Unigene0025685	739	150.422	45.2161	-1.7341	0.000401793	Down	3.83219e-06	NA	NA	GO:0007165//signal transduction;GO:0007154//cell communication	NA	gi|762160129|ref|XP_011418274.1|//PREDICTED: uncharacterized protein LOC105321613 [Crassostrea gigas]
Unigene0022144	1045	18.1528	60.7152	1.74187	0.0101936	Up	0.000293726	NA	NA	NA	NA	gi|405968947|gb|EKC33970.1|//Putative RNA-directed DNA polymerase from transposon BS [Crassostrea gigas]
Unigene0017514	1786	2059.94	4131.61	1.0041	3.83692e-06	Up	1.37843e-08	NA	NA	NA	K17341//hemicentin;K16857//thrombospondin 1	gi|762085928|ref|XP_011425283.1|//PREDICTED: mucin-5AC-like [Crassostrea gigas]
Unigene0016967	1931	306.768	628.523	1.03482	0.000483599	Up	4.84306e-06	GO:0016021//integral component of membrane	NA	NA	NA	gi|762080945|ref|XP_011419762.1|//PREDICTED: uncharacterized protein LOC105322632 [Crassostrea gigas]
Unigene0014603	3170	1588.54	712.016	-1.15772	0.00242781	Down	3.98811e-05	NA	NA	NA	K17770//mitochondrial import receptor subunit TOM20;K11143//dynein intermediate chain 2, axonemal	gi|762160093|ref|XP_011418255.1|//PREDICTED: WD repeat-containing protein 63-like isoform X3 [Crassostrea gigas]
Unigene0028965	535	25.5967	61.5781	1.26646	0.0425782	Up	0.00235538	NA	NA	NA	NA	NA
Unigene0013694	5112	328.241	136.874	-1.26191	0.032637	Down	0.00161037	GO:0030286//dynein complex;GO:0005622//intracellular	GO:1901363//heterocyclic compound binding;GO:0097159//organic cyclic compound binding;GO:0005524//ATP binding;GO:0043167//ion binding;GO:0017111//nucleoside-triphosphatase activity;GO:0003777//microtubule motor activity;GO:0036094//small molecule binding;GO:0016887//ATPase activity	GO:0007018//microtubule-based movement;GO:0006928//movement of cell or subcellular component	K10408//dynein heavy chain, axonemal	gi|405971451|gb|EKC36287.1|//Dynein heavy chain 5, axonemal [Crassostrea gigas]
Unigene0025066	787	40.0181	97.1113	1.27899	0.0220889	Up	0.000908458	NA	NA	NA	NA	NA
Unigene0011843	605	269.274	94.2537	-1.51445	0.003355	Down	6.50002e-05	NA	NA	NA	K17571//protein phosphatase 1 regulatory subunit 32	gi|405964735|gb|EKC30184.1|//Uncharacterized protein C11orf66-like protein [Crassostrea gigas]
Unigene0000953	1057	10.3958	41.7813	2.00686	0.00710727	Up	0.00017995	NA	NA	NA	K18032//receptor-type tyrosine-protein phosphatase A [EC:3.1.3.48]	gi|762128927|ref|XP_011447579.1|//PREDICTED: multiple epidermal growth factor-like domains protein 6 isoform X1 [Crassostrea gigas]
Unigene0026308	699	93177.3	193600	1.05503	0.0263136	Up	0.00115782	NA	GO:0016209//antioxidant activity;GO:0043169//cation binding;GO:0003824//catalytic activity	GO:0072593//reactive oxygen species metabolic process;GO:0044710//single-organism metabolic process	K16627//superoxide dismutase, Cu-Zn family [EC:1.15.1.1];K04565//superoxide dismutase, Cu-Zn family [EC:1.15.1.1]	gi|758343815|gb|AJO68013.1|//superoxide dismutase [Crassostrea hongkongensis]
Unigene0025666	731	22.2982	77.9873	1.80632	0.0338831	Up	0.00170776	NA	NA	NA	NA	gi|405977005|gb|EKC41478.1|//hypothetical protein CGI_10009413 [Crassostrea gigas]
Unigene0007897	5487	79.7881	159.878	1.00272	0.0221609	Up	0.000913226	NA	NA	NA	K10402//kinesin family member 20;K20478//golgin subfamily B member 1	gi|762157307|ref|XP_011416803.1|//PREDICTED: kinesin-like protein KIF20B [Crassostrea gigas]
Unigene0025142	774	33.8348	12.0189	-1.4932	0.0302692	Down	0.00143885	NA	NA	NA	NA	gi|762123756|ref|XP_011444870.1|//PREDICTED: ankyrin and armadillo repeat-containing protein-like [Crassostrea gigas]
Unigene0006809	544	33.1614	190.034	2.51868	6.66568e-10	Up	1.18674e-12	NA	NA	NA	NA	NA
Unigene0003304	1848	131.219	278.72	1.08684	0.0123403	Up	0.000386835	NA	GO:0003677//DNA binding;GO:0005524//ATP binding;GO:0004386//helicase activity	GO:0042981//regulation of apoptotic process	K12646//ATP-dependent RNA helicase DDX58 [EC:3.6.3.14];K12647//interferon-induced helicase C domain-containing protein 1 [EC:3.6.4.13]	gi|762105942|ref|XP_011435548.1|//PREDICTED: probable ATP-dependent RNA helicase DDX58, partial [Crassostrea gigas]
Unigene0025423	757	313.307	969.574	1.62977	0.00831871	Up	0.000218983	NA	NA	NA	NA	gi|762069476|ref|XP_011411859.1|//PREDICTED: uncharacterized protein LOC105346508 [Crassostrea gigas]
Unigene0000683	1482	111.074	53.1321	-1.06387	0.0254419	Down	0.00110571	NA	NA	NA	K05849//solute carrier family 8 (sodium/calcium exchanger)	gi|762122667|ref|XP_011444293.1|//PREDICTED: sodium/calcium exchanger 1-like isoform X7 [Crassostrea gigas]
Unigene0004859	261	75.9636	363.357	2.25801	0.0153376	Up	0.000529555	NA	NA	NA	NA	NA
Unigene0014409	3380	132.348	58.4987	-1.17786	0.0179987	Down	0.000680374	NA	NA	NA	K05668//ATP-binding cassette, subfamily C (CFTR/MRP), member 5	gi|762145417|ref|XP_011455987.1|//PREDICTED: multidrug resistance-associated protein 5-like [Crassostrea gigas]
Unigene0020805	1202	162.793	51.5465	-1.65909	4.31328e-05	Down	2.27636e-07	NA	NA	NA	NA	gi|762167233|ref|XP_011421941.1|//PREDICTED: uncharacterized protein LOC105324539 [Crassostrea gigas]
Unigene0027721	608	57.0519	235.372	2.0446	0.00333515	Up	6.42558e-05	NA	NA	NA	NA	NA
Unigene0000596	248	2.33536	11.0929	2.24792	0.0161421	Up	0.000575295	NA	NA	NA	NA	NA
Unigene0017750	1727	394.502	175.37	-1.16963	0.043948	Down	0.00247396	NA	NA	NA	K19970//5'-nucleotidase [EC:3.1.3.5]	gi|405962625|gb|EKC28283.1|//5'-nucleotidase [Crassostrea gigas]
Unigene0029298	517	1116.1	521.595	-1.09746	0.000224885	Down	1.78026e-06	NA	NA	NA	K01873//valyl-tRNA synthetase [EC:6.1.1.9];K01183//chitinase [EC:3.2.1.14]	gi|405971641|gb|EKC36466.1|//Fibropellin-3 [Crassostrea gigas]
Unigene0021850	1079	140.808	386.114	1.4553	5.79823e-09	Up	1.29038e-11	NA	GO:0005216//ion channel activity	GO:0006811//ion transport	K15381//MFS transporter, FLVCR family, disrupted in renal carcinoma protein 2	gi|762078357|ref|XP_011453556.1|//PREDICTED: disrupted in renal carcinoma protein 2 homolog, partial [Crassostrea gigas]
Unigene0020440	1250	43.9174	201.149	2.1954	0.000386576	Up	3.57645e-06	NA	NA	NA	K11997//tripartite motif-containing protein 2/3	gi|762130808|ref|XP_011448550.1|//PREDICTED: tripartite motif-containing protein 3-like isoform X2 [Crassostrea gigas]
Unigene0009292	708	272.77	6.02651	-5.50022	2.58091e-29	Down	9.8464e-33	NA	NA	NA	NA	NA
Unigene0024104	866	228.914	715.817	1.64478	0.00179152	Up	2.69975e-05	NA	NA	NA	NA	gi|762084717|ref|XP_011424857.1|//PREDICTED: uncharacterized protein LOC105326489 [Crassostrea gigas]
Unigene0031906	932	8.28556	64.9667	2.97103	0.000497081	Up	5.02549e-06	NA	NA	NA	NA	NA
Unigene0006254	1224	474.297	140.453	-1.7557	2.14321e-14	Down	2.24855e-17	NA	NA	NA	NA	gi|762084445|ref|XP_011424714.1|//PREDICTED: uncharacterized protein LOC105326400 [Crassostrea gigas]
Unigene0005318	1575	50147.4	22400.6	-1.16264	8.81066e-05	Down	5.43418e-07	NA	NA	NA	NA	NA
Unigene0026631	675	509.608	231.046	-1.14121	0.0105774	Down	0.000310053	GO:0016021//integral component of membrane	NA	NA	NA	gi|762122037|ref|XP_011443963.1|//PREDICTED: uncharacterized protein LOC105339885 isoform X1 [Crassostrea gigas]
Unigene0008418	784	5.70044	19.6198	1.78317	0.029015	Up	0.0013348	NA	NA	NA	K04261//prostaglandin E receptor 4	gi|762081166|ref|XP_011420878.1|//PREDICTED: prostaglandin E2 receptor EP4 subtype-like [Crassostrea gigas]
Unigene0004330	839	191.646	62.4275	-1.61819	1.19588e-05	Down	5.05666e-08	NA	NA	NA	NA	gi|762086679|ref|XP_011425620.1|//PREDICTED: nudix hydrolase 20, chloroplastic-like [Crassostrea gigas]
Unigene0011394	1248	58.9963	137.802	1.2239	0.000839226	Up	9.92536e-06	NA	NA	NA	NA	gi|762117016|ref|XP_011441355.1|//PREDICTED: uncharacterized protein LOC105338076 [Crassostrea gigas]
Unigene0016615	2042	1454.65	458.627	-1.66528	0.000133011	Down	8.96493e-07	NA	NA	NA	NA	gi|762157641|ref|XP_011416980.1|//PREDICTED: cilia- and flagella-associated protein 69-like isoform X3 [Crassostrea gigas]
Unigene0021980	1067	290.162	107.513	-1.43235	0.00294081	Down	5.3439e-05	NA	NA	NA	K10266//F-box and WD-40 domain protein 10	gi|762104756|ref|XP_011434926.1|//PREDICTED: CMT1A duplicated region transcript 1 protein-like [Crassostrea gigas]
Unigene0011061	1003	1910.39	828.075	-1.20603	0.000594608	Down	6.42737e-06	NA	NA	NA	NA	gi|762116109|ref|XP_011440878.1|//PREDICTED: uncharacterized protein LOC105337714 [Crassostrea gigas]
Unigene0012178	662	11.0401	39.5565	1.84117	0.0116144	Up	0.000354499	NA	NA	NA	NA	NA
Unigene0029000	531	37.4636	5.41201	-2.79125	6.40818e-05	Down	3.66717e-07	NA	NA	NA	K08751//fatty acid-binding protein 2, intestinal;K08753//fatty acid-binding protein 4, adipocyte;K17289//cellular retinoic acid-binding protein 2	gi|405968985|gb|EKC34001.1|//Fatty acid-binding protein, intestinal [Crassostrea gigas]
Unigene0007934	2222	50.8036	390.273	2.94148	1.47745e-31	Up	4.69717e-35	NA	NA	NA	NA	NA
Unigene0014846	2935	126.629	268.032	1.0818	0.042339	Up	0.00233452	NA	NA	NA	K17410//small subunit ribosomal protein S31	gi|762136859|ref|XP_011451715.1|//PREDICTED: uncharacterized protein LOC105345300 [Crassostrea gigas]
Unigene0001360	997	33.8855	135.282	1.99723	0.000323859	Up	2.80059e-06	NA	NA	NA	NA	gi|762078825|ref|XP_011456017.1|//PREDICTED: uncharacterized protein LOC105348342 [Crassostrea gigas]
Unigene0019461	1392	1981.72	715.944	-1.46884	0.00194136	Down	3.00579e-05	NA	GO:0005524//ATP binding;GO:0004550//nucleoside diphosphate kinase activity;GO:0016772//transferase activity, transferring phosphorus-containing groups	GO:0009260//ribonucleotide biosynthetic process;GO:0006228//UTP biosynthetic process;GO:0009209//pyrimidine ribonucleoside triphosphate biosynthetic process;GO:0006241//CTP biosynthetic process;GO:0006165//nucleoside diphosphate phosphorylation;GO:1901566//organonitrogen compound biosynthetic process;GO:0006183//GTP biosynthetic process	K00940//nucleoside-diphosphate kinase [EC:2.7.4.6]	gi|762076711|ref|XP_011446972.1|//PREDICTED: nucleoside diphosphate kinase 7-like [Crassostrea gigas]
Unigene0003820	374	99.4409	48.5973	-1.03296	0.034968	Down	0.00178124	NA	NA	NA	K04409//p21-activated kinase 1 [EC:2.7.11.1];K05733//p21-activated kinase 3 [EC:2.7.11.1]	gi|762122329|ref|XP_011444117.1|//PREDICTED: serine/threonine-protein kinase PAK 1-like isoform X2 [Crassostrea gigas]
Unigene0007456	1181	21.7475	155.215	2.83535	0.000219189	Up	1.7073e-06	NA	NA	NA	K19479//collagen, type X, alpha;K19721//collagen, type V/XI/XXIV/XXVII, alpha	gi|762086646|ref|XP_011425602.1|//PREDICTED: collagen alpha-1(VIII) chain-like [Crassostrea gigas]
Unigene0033002	1041	2375.36	851.686	-1.47975	0.000123613	Down	8.09571e-07	NA	NA	NA	NA	gi|762075498|ref|XP_011442493.1|//PREDICTED: uncharacterized protein LOC105338894 [Crassostrea gigas]
Unigene0028794	543	28.0036	125.521	2.16424	7.07369e-05	Up	4.11549e-07	NA	NA	NA	NA	gi|762085912|ref|XP_011425273.1|//PREDICTED: mucin-17-like [Crassostrea gigas]
Unigene0006126	1003	167.335	406.469	1.28041	0.0118716	Up	0.000364594	NA	NA	NA	NA	NA
Unigene0018056	1649	32624.7	14535.2	-1.16641	0.000275427	Down	2.32047e-06	NA	GO:0003824//catalytic activity	GO:0008152//metabolic process	K16627//superoxide dismutase, Cu-Zn family [EC:1.15.1.1];K04565//superoxide dismutase, Cu-Zn family [EC:1.15.1.1]	gi|405974349|gb|EKC39002.1|//Extracellular superoxide dismutase [Cu-Zn] [Crassostrea gigas]
Unigene0032239	270	2.97894	12.9834	2.1238	0.0256232	Up	0.0011209	NA	NA	NA	NA	gi|762112461|ref|XP_011438971.1|//PREDICTED: proteoglycan 4-like [Crassostrea gigas]
Unigene0008753	476	27.0369	75.1987	1.47578	0.00259195	Up	4.44317e-05	NA	NA	NA	NA	NA
Unigene0003211	1311	457.446	125.991	-1.86028	0.000114257	Down	7.33764e-07	NA	NA	NA	K02599//Notch 1	gi|762146452|ref|XP_011456523.1|//PREDICTED: uncharacterized protein LOC105348695 [Crassostrea gigas]
Unigene0007871	3119	411.414	836.336	1.02349	0.00418145	Up	9.01323e-05	NA	NA	NA	K11224//signal transducer and activator of transcription 5B	gi|762151054|ref|XP_011413502.1|//PREDICTED: uncharacterized protein LOC105318228 [Crassostrea gigas]
Unigene0025200	771	6.32731	20.7748	1.71517	0.0318859	Up	0.00155811	NA	NA	NA	NA	NA
Unigene0022490	1017	2402.01	983.451	-1.28832	0.00929521	Down	0.000258874	NA	NA	NA	NA	gi|405958403|gb|EKC24533.1|//hypothetical protein CGI_10019915 [Crassostrea gigas]
Unigene0016440	2103	709.608	282.027	-1.33119	0.00279718	Down	4.93558e-05	NA	NA	NA	K12349//neutral ceramidase [EC:3.5.1.23];K12589//exosome complex component RRP42	gi|762074833|ref|XP_011439093.1|//PREDICTED: ferric-chelate reductase 1-like isoform X2 [Crassostrea gigas]
Unigene0027668	611	588.693	14.941	-5.30017	3.03397e-58	Down	1.92914e-62	NA	NA	NA	K06087//claudin;K19289//peripheral myelin protein 22	gi|762135106|ref|XP_011450796.1|//PREDICTED: uncharacterized protein LOC105344662 [Crassostrea gigas]
Unigene0003007	250	38.3522	8.34286	-2.2007	0.0192053	Down	0.000744293	NA	NA	NA	K01158//deoxyribonuclease II [EC:3.1.22.1]	gi|405966636|gb|EKC31896.1|//Plancitoxin-1 [Crassostrea gigas]
Unigene0006068	1709	252.261	611.668	1.27783	7.91059e-07	Up	2.48982e-09	NA	NA	NA	NA	NA
Unigene0008390	2822	2816.66	1254.15	-1.16727	0.000295638	Down	2.53775e-06	NA	NA	NA	K02649//phosphoinositide-3-kinase regulatory subunit alpha/beta/delta	gi|762160171|ref|XP_011418296.1|//PREDICTED: phosphatidylinositol 3-kinase regulatory subunit alpha-like isoform X3 [Crassostrea gigas]
Unigene0005790	577	231.26	77.195	-1.58293	0.0296541	Down	0.00139342	NA	NA	NA	NA	gi|762165423|ref|XP_011421035.1|//PREDICTED: uncharacterized protein LOC105323666 [Crassostrea gigas]
Unigene0017550	1757	222.354	104.779	-1.08551	0.000701678	Down	7.91937e-06	GO:0005783//endoplasmic reticulum;GO:0044425//membrane part;GO:0005789//endoplasmic reticulum membrane;GO:0044422//organelle part	GO:0000166//nucleotide binding;GO:0004497//monooxygenase activity;GO:0050662//coenzyme binding	NA	K00485//dimethylaniline monooxygenase (N-oxide forming) [EC:1.14.13.8]	gi|405951239|gb|EKC19169.1|//Dimethylaniline monooxygenase [N-oxide-forming] 5 [Crassostrea gigas]
Unigene0032864	394	19.4362	56.8735	1.54901	0.0054922	Up	0.000131482	NA	NA	NA	NA	gi|762100753|ref|XP_011432836.1|//PREDICTED: uncharacterized protein LOC105332094 [Crassostrea gigas]
Unigene0007003	941	1293.48	614.894	-1.07285	0.000453794	Down	4.45802e-06	NA	NA	NA	NA	gi|405950165|gb|EKC18168.1|//hypothetical protein CGI_10014656 [Crassostrea gigas]
Unigene0000003	396	45.5563	12.5325	-1.86198	0.0267455	Down	0.00118108	NA	NA	NA	NA	NA
Unigene0019817	1335	213.462	106.075	-1.00889	0.00250573	Down	4.19029e-05	NA	NA	NA	K07847//Rad and Gem related GTP binding protein 1	gi|405964989|gb|EKC30420.1|//GTP-binding protein GEM [Crassostrea gigas]
Unigene0012001	788	1490.15	3630.45	1.28469	0.017079	Up	0.000629317	NA	NA	NA	K07188//hormone-sensitive lipase [EC:3.1.1.79]	gi|762167446|ref|XP_011422055.1|//PREDICTED: placenta-specific gene 8 protein-like [Crassostrea gigas]
Unigene0016097	2235	27.5649	79.4731	1.52764	0.0120864	Up	0.000373882	NA	NA	NA	K06238//collagen, type VI, alpha	gi|405966044|gb|EKC31369.1|//Collagen alpha-1(XII) chain [Crassostrea gigas]
Unigene0010350	401	13.4939	60.7401	2.17034	0.00717525	Up	0.000182495	NA	NA	NA	NA	NA
Unigene0022428	1024	42.2974	16.0203	-1.40067	0.0255419	Down	0.00111493	NA	NA	NA	K17849//E3 ubiquitin-protein ligase HECTD4 [EC:2.3.2.26]	gi|762070847|ref|XP_011424070.1|//PREDICTED: probable E3 ubiquitin-protein ligase HECTD4 isoform X2 [Crassostrea gigas]
Unigene0018621	1539	121.09	58.1054	-1.05934	0.00826373	Down	0.00021701	NA	NA	NA	K14972//PAX-interacting protein 1	gi|762116071|ref|XP_011440859.1|//PREDICTED: PAX-interacting protein 1-like isoform X2 [Crassostrea gigas]
Unigene0024650	823	240.008	108.79	-1.14154	0.000438723	Down	4.26415e-06	NA	GO:0005488//binding	GO:0044237//cellular metabolic process	K02183//calmodulin	gi|405958465|gb|EKC24592.1|//Calmodulin [Crassostrea gigas]
Unigene0012408	331	115.155	43.4803	-1.40514	0.00779631	Down	0.000202009	GO:0016021//integral component of membrane	NA	NA	NA	gi|762143302|ref|XP_011454899.1|//PREDICTED: uncharacterized protein LOC105347486 [Crassostrea gigas]
Unigene0023002	964	447.959	209.822	-1.0942	0.00834328	Down	0.000220184	NA	NA	NA	NA	gi|405953440|gb|EKC21101.1|//Zinc finger protein Noc [Crassostrea gigas]
Unigene0016778	1996	3663.02	1712.62	-1.09683	0.0222136	Down	0.000918093	NA	NA	NA	K16796//transcription factor SOX2 (SOX group B);K09267//transcription factor SOX1/3/14/21 (SOX group B)	gi|405958762|gb|EKC24855.1|//Transcription factor SOX-2 [Crassostrea gigas]
Unigene0024398	840	1794.28	6459.6	1.84804	3.39376e-06	Up	1.20843e-08	NA	NA	NA	NA	gi|762162127|ref|XP_011419312.1|//PREDICTED: uncharacterized protein LOC105322358 isoform X2 [Crassostrea gigas]
Unigene0010393	1085	234.321	101.934	-1.20085	0.0281406	Down	0.0012722	NA	NA	NA	NA	gi|762076892|ref|XP_011447850.1|//PREDICTED: MYCBP-associated protein-like isoform X5 [Crassostrea gigas]
Unigene0006189	476	18.8824	68.5454	1.86002	0.00470819	Up	0.000105542	NA	NA	NA	K01435//biotinidase [EC:3.5.1.12];K08069//pantetheine hydrolase [EC:3.5.1.92]	gi|762138407|ref|XP_011452523.1|//PREDICTED: pantetheinase-like [Crassostrea gigas]
Unigene0011521	1014	11.6237	48.3726	2.05711	0.00295385	Up	5.39044e-05	NA	NA	NA	NA	NA
Unigene0003167	417	17.152	42.133	1.29657	0.0434661	Up	0.00243352	NA	NA	NA	NA	NA
Unigene0022358	1031	138.317	289.912	1.06764	0.000711506	Up	8.0529e-06	NA	NA	NA	K12478//early endosome antigen 1	gi|762149505|ref|XP_011412694.1|//PREDICTED: early endosome antigen 1-like [Crassostrea gigas]
Unigene0020107	1295	37.4904	109.969	1.5525	0.0290686	Up	0.00134121	NA	NA	NA	K17341//hemicentin	gi|762082404|ref|XP_011424013.1|//PREDICTED: E3 ubiquitin-protein ligase RNF213-like [Crassostrea gigas]
Unigene0028111	585	783.769	275.959	-1.50598	3.4546e-05	Down	1.69138e-07	NA	NA	NA	NA	gi|405975750|gb|EKC40298.1|//hypothetical protein CGI_10023733 [Crassostrea gigas]
Unigene0031737	1794	39.576	103.777	1.39079	0.000603449	Up	6.54213e-06	NA	NA	NA	K04257//olfactory receptor	gi|403334965|gb|EJY66653.1|//hypothetical protein OXYTRI_13058 [Oxytricha trifallax]
Unigene0030416	389	15.2957	90.7116	2.56816	0.00334429	Up	6.46445e-05	NA	NA	NA	NA	NA
Unigene0028488	564	33931.1	9697.28	-1.80696	0.000176917	Down	1.26554e-06	NA	NA	NA	NA	gi|762136002|ref|XP_011451259.1|//PREDICTED: uncharacterized protein LOC105344998 isoform X1 [Crassostrea gigas]
Unigene0022927	967	349.893	139.396	-1.32773	0.0386644	Down	0.00205321	NA	NA	NA	NA	gi|405975950|gb|EKC40478.1|//hypothetical protein CGI_10013514 [Crassostrea gigas]
Unigene0015569	2491	774.614	218.702	-1.82451	0.000174266	Down	1.24103e-06	NA	NA	NA	NA	gi|762112224|ref|XP_011438841.1|//PREDICTED: uncharacterized protein LOC105336294 [Crassostrea gigas]
Unigene0009640	839	7.75365	31.78	2.03517	0.0329143	Up	0.0016296	NA	NA	NA	NA	NA
Unigene0003181	1075	48.5116	116.543	1.26446	0.00645316	Up	0.000159	NA	NA	NA	NA	gi|405968947|gb|EKC33970.1|//Putative RNA-directed DNA polymerase from transposon BS [Crassostrea gigas]
Unigene0020515	1242	1033.34	506.787	-1.02786	0.00897371	Down	0.000244214	NA	NA	NA	K06054//hairy and enhancer of split 1;K09090//hairy and enhancer of split, invertebrate	gi|762146083|ref|XP_011456334.1|//PREDICTED: transcription factor HES-1-B-like [Crassostrea gigas]
Unigene0011389	1022	1294.18	644.87	-1.00496	0.00471709	Down	0.000106027	NA	NA	NA	NA	gi|762144631|ref|XP_011455581.1|//PREDICTED: uncharacterized protein LOC105348017 [Crassostrea gigas]
Unigene0016663	2016	151.216	324.708	1.10253	0.00346421	Up	6.80638e-05	NA	NA	NA	K20478//golgin subfamily B member 1	gi|762092390|ref|XP_011428628.1|//PREDICTED: nuclear anchorage protein 1-like isoform X1 [Crassostrea gigas]
Unigene0012019	335	1.68244	7.08914	2.07506	0.0304984	Up	0.00145734	NA	NA	NA	NA	gi|762108643|ref|XP_011436950.1|//PREDICTED: phytanoyl-CoA hydroxylase-interacting protein-like isoform X2 [Crassostrea gigas]
Unigene0020016	1309	83.7982	34.5666	-1.27754	0.0163234	Down	0.00058383	NA	NA	NA	K11661//helicase SRCAP [EC:3.6.4.-]	gi|762108482|ref|XP_011436866.1|//PREDICTED: protein capicua homolog [Crassostrea gigas]
Unigene0005033	1530	417.723	162.897	-1.35859	0.032765	Down	0.00161877	NA	NA	NA	K06252//tenascin	gi|762154927|ref|XP_011415548.1|//PREDICTED: phosphatidylinositol phosphatase PTPRQ-like [Crassostrea gigas]
Unigene0017897	1691	32.7613	74.8457	1.19193	0.033327	Up	0.00166349	NA	NA	NA	NA	gi|762119992|ref|XP_011442914.1|//PREDICTED: BRCA1-associated ATM activator 1-like [Crassostrea gigas]
Unigene0026362	695	41.4509	110.951	1.42045	0.0121368	Up	0.000377754	NA	NA	NA	NA	NA
Unigene0027342	632	18.6559	104.283	2.4828	5.11613e-06	Up	1.88679e-08	NA	NA	NA	NA	gi|405966922|gb|EKC32149.1|//hypothetical protein CGI_10022180 [Crassostrea gigas]
Unigene0010961	660	159.484	44.6967	-1.83517	0.000115083	Down	7.4273e-07	NA	NA	NA	NA	gi|762102334|ref|XP_011433661.1|//PREDICTED: ankyrin repeat domain-containing protein 55-like isoform X2 [Crassostrea gigas]
Unigene0026728	672	43.092	202.946	2.2356	2.14294e-06	Up	7.35797e-09	NA	NA	NA	NA	gi|405975312|gb|EKC39886.1|//Hemicentin-1 [Crassostrea gigas]
Unigene0018162	1637	118.376	412.703	1.80173	4.0919e-05	Up	2.12049e-07	NA	NA	NA	NA	gi|762108275|ref|XP_011436761.1|//PREDICTED: uncharacterized protein LOC105334857 isoform X1 [Crassostrea gigas]
Unigene0023964	878	74.8166	36.716	-1.02695	0.0408112	Down	0.00221841	GO:0044424//intracellular part	GO:0016787//hydrolase activity	NA	NA	gi|762081249|ref|XP_011421231.1|//PREDICTED: uncharacterized protein LOC105323839 [Crassostrea gigas]
Unigene0017109	1892	2858.18	1022.02	-1.48368	0.000231511	Down	1.86952e-06	NA	NA	NA	NA	gi|405977380|gb|EKC41837.1|//Radial spoke head protein 3-like protein [Crassostrea gigas]
Unigene0022483	1018	1194.18	501.688	-1.25116	0.00151099	Down	2.13289e-05	NA	GO:0003755//peptidyl-prolyl cis-trans isomerase activity;GO:0016859//cis-trans isomerase activity	GO:0006457//protein folding;GO:0018208//peptidyl-proline modification;GO:0000413//protein peptidyl-prolyl isomerization	K12739//peptidyl-prolyl cis-trans isomerase-like 6 [EC:5.2.1.8]	gi|676484878|ref|XP_009063485.1|//hypothetical protein LOTGIDRAFT_195649 [Lottia gigantea]
Unigene0027969	579	15.9127	50.1692	1.65662	0.0267455	Up	0.00118027	NA	NA	NA	NA	NA
Unigene0006220	1795	141.507	43.6497	-1.69683	0.0460184	Down	0.00263493	NA	NA	NA	K17604//zinc finger SWIM domain-containing protein 3;K06231//hedgehog interacting protein	gi|999975401|gb|KXJ14575.1|//Ubiquitin-like-specific protease 1 [Exaiptasia pallida]
Unigene0015634	2459	1589.66	693.825	-1.19607	1.82192e-05	Down	8.3989e-08	NA	NA	NA	NA	gi|762132115|ref|XP_011449239.1|//PREDICTED: coiled-coil domain-containing protein 173-like [Crassostrea gigas]
Unigene0005484	675	862.182	254.689	-1.75926	7.09788e-05	Down	4.15212e-07	NA	NA	NA	K00820//glucosamine--fructose-6-phosphate aminotransferase (isomerizing) [EC:2.6.1.16]	gi|762127166|ref|XP_011446658.1|//PREDICTED: glutamine--fructose-6-phosphate aminotransferase [isomerizing] 1-like isoform X3 [Crassostrea gigas]
Unigene0008959	3936	67.8977	373.932	2.46134	3.28367e-14	Up	3.54946e-17	NA	NA	NA	K06763//contactin 5;K06761//contactin 3;K06759//contactin 1	gi|762163324|ref|XP_011419951.1|//PREDICTED: contactin-like [Crassostrea gigas]
Unigene0021722	1093	72.8398	30.7951	-1.24203	0.0128503	Down	0.000412034	NA	NA	NA	K15166//mediator of RNA polymerase II transcription subunit 23	gi|762151986|ref|XP_011413991.1|//PREDICTED: mediator of RNA polymerase II transcription subunit 23-like isoform X2 [Crassostrea gigas]
Unigene0031898	4355	769.543	321.647	-1.25852	0.00955499	Down	0.00026945	NA	NA	NA	K00939//adenylate kinase [EC:2.7.4.3]	gi|762070626|ref|XP_011414807.1|//PREDICTED: sperm flagellar protein 2-like isoform X4 [Crassostrea gigas]
Unigene0022577	1003	68.352	26.1736	-1.38487	0.011122	Down	0.000331672	NA	NA	NA	K05643//ATP-binding cassette, subfamily A (ABC1), member 3	gi|405974925|gb|EKC39537.1|//ATP-binding cassette sub-family A member 3 [Crassostrea gigas]
Unigene0019422	1398	341.629	142.023	-1.2663	0.000539139	Down	5.57068e-06	NA	NA	NA	K00894//ethanolamine kinase [EC:2.7.1.82]	gi|405966328|gb|EKC31627.1|//Ethanolamine kinase 1 [Crassostrea gigas]
Unigene0029723	487	104.226	24.3558	-2.09738	0.00338761	Down	6.61754e-05	NA	NA	NA	NA	gi|405955821|gb|EKC22777.1|//hypothetical protein CGI_10001499 [Crassostrea gigas]
Unigene0012213	699	179.114	49.7951	-1.8468	0.00431593	Down	9.44033e-05	NA	NA	NA	NA	gi|762112222|ref|XP_011438840.1|//PREDICTED: uncharacterized protein LOC105336293 [Crassostrea gigas]
Unigene0011342	252	141.231	44.9184	-1.65268	0.00320634	Down	6.04316e-05	NA	NA	NA	NA	NA
Unigene0027056	651	279.171	128.009	-1.12491	0.0145676	Down	0.000490467	NA	NA	NA	K13909//mucin-7	gi|762145785|ref|XP_011456173.1|//PREDICTED: uncharacterized protein LOC105348454 [Crassostrea gigas]
Unigene0019286	1413	26.177	90.3315	1.78693	0.0266649	Up	0.00117497	NA	NA	NA	K04261//prostaglandin E receptor 4;K04263//prostacyclin receptor	gi|405964170|gb|EKC29687.1|//Prostaglandin E2 receptor EP4 subtype [Crassostrea gigas]
Unigene0022569	1002	15.8325	43.1615	1.44686	0.0353778	Up	0.00181984	NA	NA	NA	K03013//DNA-directed RNA polymerases I, II, and III subunit RPABC1;K17551//neurabin	gi|157887063|emb|CAP09075.1|//minos transposase [Drosophila hydei]
Unigene0016617	2042	99.5704	28.4772	-1.80591	0.00539563	Down	0.000128655	NA	GO:0005488//binding	NA	K08035//forkhead box protein A2, hepatocyte nuclear factor 3-beta	gi|762150945|ref|XP_011413445.1|//PREDICTED: silk gland factor 1-like [Crassostrea gigas]
Unigene0007036	725	105.189	34.455	-1.6102	0.000186357	Down	1.37702e-06	NA	NA	NA	NA	gi|762092909|ref|XP_011428896.1|//PREDICTED: uncharacterized protein LOC105329372 isoform X2 [Crassostrea gigas]
Unigene0018746	1510	165.858	440.577	1.40944	0.00177009	Up	2.65057e-05	NA	NA	NA	NA	gi|762157937|ref|XP_011417130.1|//PREDICTED: uncharacterized protein LOC105320768 [Crassostrea gigas]
Unigene0001811	339	66.9606	137.579	1.03888	0.0299292	Up	0.00141586	NA	NA	NA	NA	NA
Unigene0006185	379	287.449	100.894	-1.51046	0.029652	Down	0.00138527	NA	NA	NA	NA	gi|405958791|gb|EKC24883.1|//Arginine kinase [Crassostrea gigas]
Unigene0028306	574	18.1218	49.5515	1.4512	0.0243072	Up	0.00103425	NA	NA	NA	NA	NA
Unigene0021961	1066	83.1299	217.19	1.38552	0.0111186	Up	0.000331217	NA	NA	NA	K10405//kinesin family member C1;K05544//tRNA-dihydrouridine synthase 3 [EC:1.3.1.89]	gi|762157079|ref|XP_011416685.1|//PREDICTED: uncharacterized protein LOC105320456 isoform X1 [Crassostrea gigas]
Unigene0020817	1201	162.351	472.856	1.54229	0.00115188	Up	1.47949e-05	NA	NA	NA	NA	gi|762108627|ref|XP_011436942.1|//PREDICTED: uncharacterized protein LOC105334989 [Crassostrea gigas]
Unigene0032984	1586	432.169	1179.54	1.44856	3.9411e-14	Up	4.3854e-17	GO:0031224//intrinsic component of membrane;GO:0016021//integral component of membrane	GO:0005326//neurotransmitter transporter activity;GO:0015291//secondary active transmembrane transporter activity;GO:0005328//neurotransmitter:sodium symporter activity	GO:0055085//transmembrane transport;GO:0006836//neurotransmitter transport;GO:0044765//single-organism transport	K05039//solute carrier family 6 (neurotransmitter transporter, GABA) member 6/8/11/12/13	gi|762169225|ref|XP_011423014.1|//PREDICTED: sodium- and chloride-dependent taurine transporter-like isoform X2 [Crassostrea gigas]
Unigene0014607	3186	578.583	210.347	-1.45975	0.00185716	Down	2.83409e-05	NA	NA	NA	K02183//calmodulin	gi|762151066|ref|XP_011413509.1|//PREDICTED: EF-hand calcium-binding domain-containing protein 6-like isoform X5 [Crassostrea gigas]
Unigene0017678	1747	22.4145	75.162	1.74557	0.031121	Up	0.00149995	NA	NA	NA	K17495//CUB and sushi domain-containing protein;K13046//tolkin [EC:3.4.24.-]	gi|762074895|ref|XP_011439404.1|//PREDICTED: uncharacterized protein LOC105336675 [Crassostrea gigas]
Unigene0030179	447	102.214	17.0595	-2.58294	0.00265708	Down	4.60624e-05	NA	NA	NA	NA	NA
Unigene0005806	851	89.103	179.645	1.0116	0.0152008	Up	0.000520795	NA	NA	NA	K12898//heterogeneous nuclear ribonucleoprotein F/H	gi|762103132|ref|XP_011434080.1|//PREDICTED: heterogeneous nuclear ribonucleoprotein F-like isoform X3 [Crassostrea gigas]
Unigene0019875	1320	32.3245	11.6913	-1.46719	0.0430323	Down	0.00239146	NA	NA	NA	NA	gi|762108482|ref|XP_011436866.1|//PREDICTED: protein capicua homolog [Crassostrea gigas]
Unigene0008657	1887	83.3008	35.3162	-1.238	0.0494795	Down	0.0029448	NA	NA	NA	K14794//ribosomal RNA-processing protein 12	gi|762113771|ref|XP_011439648.1|//PREDICTED: RRP12-like protein [Crassostrea gigas]
Unigene0030565	317	166.676	369.059	1.1468	0.0161618	Up	0.000576508	NA	NA	NA	NA	NA
Unigene0008447	3102	233.134	100.93	-1.2078	0.00232581	Down	3.7859e-05	NA	NA	NA	K14704//solute carrier family 26 (sulfate anion transporter), member 6;K14703//solute carrier family 26, member 5;K14701//solute carrier family 26 (sulfate anion transporter), member 2	gi|762143417|ref|XP_011454958.1|//PREDICTED: sulfate transporter-like isoform X2 [Crassostrea gigas]
Unigene0010500	1281	157.999	408.872	1.37173	3.13267e-05	Up	1.49393e-07	NA	NA	NA	NA	gi|762167320|ref|XP_011421992.1|//PREDICTED: uncharacterized protein LOC105324569 [Crassostrea gigas]
Unigene0019764	1345	229.838	113.861	-1.01334	0.00852436	Down	0.000227649	NA	NA	NA	NA	gi|405963380|gb|EKC28957.1|//X-ray radiation resistance-associated protein 1 [Crassostrea gigas]
Unigene0021937	1061	12.3159	39.3455	1.67568	0.0352638	Up	0.00181286	NA	NA	NA	K05694//receptor-type tyrosine-protein phosphatase beta [EC:3.1.3.48]	gi|762083052|ref|XP_011424201.1|//PREDICTED: tyrosine-protein phosphatase 10D-like [Crassostrea gigas]
Unigene0014083	3919	142.553	62.3305	-1.19348	0.0156208	Down	0.0005443	NA	NA	NA	K20161//DENN domain-containing protein 2	gi|762070774|ref|XP_011421984.1|//PREDICTED: suppression of tumorigenicity 5 protein-like isoform X2 [Crassostrea gigas]
Unigene0001598	634	95.3554	270.018	1.50167	0.00311797	Up	5.81601e-05	NA	NA	NA	K04397//caspase 7 [EC:3.4.22.60]	gi|762143434|ref|XP_011454968.1|//PREDICTED: caspase-2-like, partial [Crassostrea gigas]
Unigene0004941	365	60.6095	25.3604	-1.25697	0.0377355	Down	0.00197831	NA	NA	NA	NA	gi|762084563|ref|XP_011424778.1|//PREDICTED: uncharacterized protein LOC105326431 isoform X2 [Crassostrea gigas]
Unigene0007424	478	222.957	584.702	1.39094	0.0125242	Up	0.000396981	NA	NA	NA	K06238//collagen, type VI, alpha	gi|762086866|ref|XP_011425715.1|//PREDICTED: collagen alpha-1(XII) chain-like [Crassostrea gigas]
Unigene0010117	1726	49.0823	221.897	2.17661	0.0209824	Up	0.000845193	NA	NA	NA	NA	gi|762117380|ref|XP_011441544.1|//PREDICTED: uncharacterized protein LOC105338226 [Crassostrea gigas]
Unigene0027496	622	1388.15	673.537	-1.04334	0.000188952	Down	1.41771e-06	NA	NA	NA	NA	gi|762094015|ref|XP_011429478.1|//PREDICTED: uncharacterized protein LOC105329767 isoform X2 [Crassostrea gigas]
Unigene0015877	2331	5154.06	1140.12	-2.17652	2.68433e-05	Down	1.26306e-07	NA	NA	NA	K14683//solute carrier family 34 (sodium-dependent phosphate cotransporter)	gi|405971981|gb|EKC36780.1|//Sodium-dependent phosphate transport protein 2B [Crassostrea gigas]
Unigene0019836	1334	11.6332	40.544	1.80124	0.0127329	Up	0.000405089	NA	NA	NA	NA	gi|405972919|gb|EKC37665.1|//Erythronolide synthase, modules 3 and 4 [Crassostrea gigas]
Unigene0004331	776	291.222	104.298	-1.48141	8.11041e-08	Down	2.11437e-10	NA	NA	NA	NA	gi|762086679|ref|XP_011425620.1|//PREDICTED: nudix hydrolase 20, chloroplastic-like [Crassostrea gigas]
Unigene0019489	1387	351.361	135.963	-1.36974	0.00410511	Down	8.78344e-05	NA	NA	NA	K08574//calpain-5 [EC:3.4.22.-]	gi|762144709|ref|XP_011455620.1|//PREDICTED: calpain-5-like isoform X2 [Crassostrea gigas]
Unigene0017455	1799	283.927	140.271	-1.01731	0.0194036	Down	0.000757842	NA	NA	NA	K10444//kelch-like protein 6;K10461//kelch-like protein 24/35	gi|762086978|ref|XP_011425770.1|//PREDICTED: kelch-like protein 24 [Crassostrea gigas]
Unigene0003887	1544	747.052	358.308	-1.06001	0.0294909	Down	0.00137357	NA	NA	NA	NA	NA
Unigene0018217	1628	126.752	309.565	1.28824	0.00711849	Up	0.000180599	NA	NA	NA	K08008//NADPH oxidase	gi|405969816|gb|EKC34765.1|//NADPH oxidase 5 [Crassostrea gigas]
Unigene0017553	1777	1332.83	652.685	-1.03003	0.0134664	Down	0.000438874	GO:0005623//cell	GO:0016853//isomerase activity	GO:0045454//cell redox homeostasis	K09584//protein disulfide-isomerase A6 [EC:5.3.4.1]	gi|405951637|gb|EKC19533.1|//Protein disulfide-isomerase A6 [Crassostrea gigas]
Unigene0020385	1262	210.769	433.937	1.04182	1.56994e-05	Up	6.9877e-08	NA	NA	NA	NA	NA
Unigene0011935	665	503.989	1042.09	1.04801	0.0103007	Up	0.000298232	NA	NA	NA	NA	gi|762126336|ref|XP_011446220.1|//PREDICTED: uncharacterized protein LOC105341396 [Crassostrea gigas]
Unigene0011090	976	134.91	62.7424	-1.10448	0.0158219	Down	0.000558349	NA	NA	NA	NA	gi|762087145|ref|XP_011425855.1|//PREDICTED: uncharacterized protein LOC105327225 isoform X4 [Crassostrea gigas]
Unigene0002831	762	15.3501	43.2855	1.49563	0.0482254	Up	0.0028269	NA	NA	NA	NA	NA
Unigene0018676	1531	102.504	30.4377	-1.75174	0.00189093	Down	2.91569e-05	NA	NA	NA	K03211//ETS translocation variant 6/7	gi|762170026|ref|XP_011423431.1|//PREDICTED: transcription factor ETV7-like isoform X4 [Crassostrea gigas]
Unigene0011872	655	4.08422	18.7919	2.20198	0.0155558	Up	0.000540551	NA	NA	NA	K08399//leucine-rich repeat-containing G protein-coupled receptor 6;K18808//toll-like receptor 13	gi|762116157|ref|XP_011440901.1|//PREDICTED: toll-like receptor 13 [Crassostrea gigas]
Unigene0004967	420	5.49426	403.53	6.19861	1.90533e-48	Up	1.81726e-52	NA	NA	NA	NA	NA
Unigene0026554	682	42.3068	177.679	2.07031	1.05222e-05	Up	4.31539e-08	NA	NA	NA	NA	gi|762167660|ref|XP_011422167.1|//PREDICTED: uncharacterized protein LOC105324711 [Crassostrea gigas]
Unigene0014869	2930	3310.99	1529.65	-1.11406	0.000164775	Down	1.15669e-06	GO:0016020//membrane	GO:0015293//symporter activity	GO:0006810//transport	K05038//solute carrier family 6 (neurotransmitter transporter, amino acid) member 5/7/9/14	gi|762122417|ref|XP_011444158.1|//PREDICTED: sodium- and chloride-dependent neutral and basic amino acid transporter B(0+)-like isoform X2 [Crassostrea gigas]
Unigene0024747	817	1345.18	4654.15	1.79072	0.00149165	Up	2.09498e-05	NA	NA	NA	NA	gi|405970511|gb|EKC35409.1|//Diamine acetyltransferase 2 [Crassostrea gigas]
Unigene0020131	1292	7.05523	40.8013	2.53185	0.000361	Up	3.27096e-06	NA	NA	NA	K10645//E3 ubiquitin-protein ligase mind-bomb [EC:2.3.2.27]	gi|762084734|ref|XP_011424866.1|//PREDICTED: E3 ubiquitin-protein ligase MIB2-like isoform X1 [Crassostrea gigas]
Unigene0023046	956	148.768	312.795	1.07215	0.000414616	Up	3.99404e-06	NA	NA	NA	NA	gi|762083228|ref|XP_011424261.1|//PREDICTED: uncharacterized protein LOC105326099 [Crassostrea gigas]
Unigene0021578	1109	49.1841	198.567	2.01336	1.93198e-06	Up	6.44935e-09	NA	NA	NA	NA	gi|762116643|ref|XP_011441161.1|//PREDICTED: uncharacterized protein LOC105337922 [Crassostrea gigas]
Unigene0020602	1224	22.757	92.1187	2.01718	0.022163	Up	0.000914594	NA	NA	NA	K12646//ATP-dependent RNA helicase DDX58 [EC:3.6.3.14];K04829//acid-sensing ion channel 1;K01197//hyaluronoglucosaminidase [EC:3.2.1.35];K18085//myotubularin-related protein 10/11/12	gi|762152083|ref|XP_011414041.1|//PREDICTED: uncharacterized protein LOC105318542 isoform X2 [Crassostrea gigas]
Unigene0008916	2389	2755.66	1205.92	-1.19227	0.002828	Down	5.01693e-05	NA	NA	NA	K10409//dynein intermediate chain 1, axonemal	gi|762076587|ref|XP_011446290.1|//PREDICTED: dynein intermediate chain 2, ciliary-like isoform X4 [Crassostrea gigas]
Unigene0023590	912	29.657	75.1804	1.34198	0.0259262	Up	0.0011383	NA	NA	NA	K14349//neutral cholesterol ester hydrolase 1 [EC:3.1.1.-]	gi|762141901|ref|XP_011454150.1|//PREDICTED: neutral cholesterol ester hydrolase 1-like [Crassostrea gigas]
Unigene0017882	1696	174.93	86.8783	-1.00971	0.033295	Down	0.00166084	NA	NA	NA	K19673//tetratricopeptide repeat protein 21B	gi|762151306|ref|XP_011413636.1|//PREDICTED: tetratricopeptide repeat protein 21B-like isoform X3 [Crassostrea gigas]
Unigene0017140	1877	10161.8	5058.32	-1.00643	0.00324276	Down	6.15834e-05	NA	NA	NA	K19756//radial spoke head protein 4A	gi|762119151|ref|XP_011442475.1|//PREDICTED: radial spoke head protein 4 homolog A-like [Crassostrea gigas]
Unigene0022985	966	280.32	108.63	-1.36765	0.00195721	Down	3.04278e-05	NA	NA	NA	NA	gi|762092321|ref|XP_011428591.1|//PREDICTED: uncharacterized protein LOC105329120 [Crassostrea gigas]
Unigene0016790	1993	51.9008	19.5985	-1.40501	0.0446958	Down	0.00253725	NA	NA	NA	K18460//exportin-7	gi|676475007|ref|XP_009060331.1|//hypothetical protein LOTGIDRAFT_106479, partial [Lottia gigantea]
Unigene0029154	525	414.97	141.177	-1.5555	0.0165832	Down	0.00059787	NA	NA	NA	NA	gi|762154066|ref|XP_011415090.1|//PREDICTED: protein IQ-DOMAIN 14-like isoform X1 [Crassostrea gigas]
Unigene0028368	571	578.567	247.173	-1.22696	0.00126489	Down	1.68088e-05	NA	NA	NA	NA	NA
Unigene0012784	212	42.7261	4.88347	-3.12914	0.000171222	Down	1.21392e-06	NA	NA	NA	K10352//myosin heavy chain	gi|762104658|ref|XP_011434875.1|//PREDICTED: golgin subfamily A member 6A-like isoform X2 [Crassostrea gigas]
Unigene0014926	2880	784.029	386.67	-1.01981	0.0141309	Down	0.000470488	NA	NA	NA	K19532//lamin-B receptor	gi|762125873|ref|XP_011445974.1|//PREDICTED: delta(14)-sterol reductase-like [Crassostrea gigas]
Unigene0021511	1108	65.6644	188.98	1.52505	0.0193552	Up	0.000753187	NA	NA	NA	K10901//bloom syndrome protein [EC:3.6.4.12];K03654//ATP-dependent DNA helicase RecQ [EC:3.6.4.12]	gi|762140175|ref|XP_011453251.1|//PREDICTED: ATP-dependent DNA helicase Q-like 1 [Crassostrea gigas]
Unigene0020622	1227	84.8586	34.5175	-1.29773	0.00605725	Down	0.000147898	NA	GO:0016491//oxidoreductase activity	GO:0055114//oxidation-reduction process	K14157//alpha-aminoadipic semialdehyde synthase [EC:1.5.1.8 1.5.1.9]	gi|762080935|ref|XP_011419718.1|//PREDICTED: alpha-aminoadipic semialdehyde synthase, mitochondrial-like isoform X1 [Crassostrea gigas]
Unigene0033199	369	1359.65	557.814	-1.28538	0.00240918	Down	3.92927e-05	NA	NA	NA	NA	gi|762075498|ref|XP_011442493.1|//PREDICTED: uncharacterized protein LOC105338894 [Crassostrea gigas]
Unigene0030457	389	5372.04	1205.67	-2.15563	5.84918e-14	Down	6.69456e-17	NA	NA	NA	NA	gi|405962640|gb|EKC28297.1|//hypothetical protein CGI_10021602 [Crassostrea gigas]
Unigene0007824	14097	425.967	209.544	-1.02349	0.0151707	Down	0.000518005	NA	NA	NA	K02599//Notch 1	gi|762082033|ref|XP_011423266.1|//PREDICTED: uncharacterized protein LOC105325414 [Crassostrea gigas]
Unigene0015174	2696	71.3817	346.252	2.2782	0.000339544	Up	2.9794e-06	NA	NA	NA	K11140//aminopeptidase N [EC:3.4.11.2]	gi|762124202|ref|XP_011445107.1|//PREDICTED: uncharacterized protein LOC105340635 isoform X2 [Crassostrea gigas]
Unigene0014693	3099	592.199	288.453	-1.03775	0.00660994	Down	0.000164015	NA	NA	NA	K19671//WD repeat-containing protein 19	gi|524872012|ref|XP_005092773.1|//PREDICTED: WD repeat-containing protein 19-like [Aplysia californica]
Unigene0016534	2071	378.31	785.02	1.05316	0.00330695	Up	6.36073e-05	NA	GO:0016859//cis-trans isomerase activity	GO:0018208//peptidyl-proline modification	K09568//FK506-binding protein 1 [EC:5.2.1.8]	gi|762072263|ref|XP_011429389.1|//PREDICTED: peptidyl-prolyl cis-trans isomerase FKBP1A-like [Crassostrea gigas]
Unigene0010476	675	100.902	249.87	1.30822	0.0181687	Up	0.000690971	NA	NA	NA	NA	gi|405963512|gb|EKC29077.1|//hypothetical protein CGI_10016248 [Crassostrea gigas]
Unigene0012267	797	3817.43	1311.89	-1.54095	0.00132508	Down	1.79043e-05	NA	NA	NA	NA	gi|762096265|ref|XP_011430655.1|//PREDICTED: protein SPEC3-like [Crassostrea gigas]
Unigene0024667	822	60.4936	180.225	1.57495	0.00958519	Up	0.000270941	NA	NA	NA	NA	gi|762142157|ref|XP_011454290.1|//PREDICTED: uncharacterized protein LOC105347091 isoform X1 [Crassostrea gigas]
Unigene0011898	221	42.6734	14.3987	-1.5674	0.0470109	Down	0.00271268	NA	NA	NA	NA	gi|762112222|ref|XP_011438840.1|//PREDICTED: uncharacterized protein LOC105336293 [Crassostrea gigas]
Unigene0008230	3266	437992	71725.4	-2.61035	3.18665e-16	Down	2.63409e-19	NA	NA	NA	K14755//carnosine synthase [EC:6.3.2.11]	gi|405965436|gb|EKC30812.1|//ATP-grasp domain-containing protein 1 [Crassostrea gigas]
Unigene0028694	540	500.11	139.492	-1.84206	0.0037788	Down	7.81496e-05	NA	NA	NA	NA	gi|762126032|ref|XP_011446058.1|//PREDICTED: uncharacterized protein LOC105341314 [Crassostrea gigas]
Unigene0001188	810	104.933	285.646	1.44477	0.00283816	Up	5.05299e-05	NA	NA	NA	NA	gi|762075982|ref|XP_011445163.1|//PREDICTED: putative phosphatidylglycerol/phosphatidylinositol transfer protein DDB_G0282107 [Crassostrea gigas]
Unigene0028619	556	325.112	143.561	-1.17928	0.000390646	Down	3.66378e-06	GO:0032991//macromolecular complex;GO:0005874//microtubule;GO:0015630//microtubule cytoskeleton;GO:0005737//cytoplasm	GO:0017111//nucleoside-triphosphatase activity;GO:0005198//structural molecule activity;GO:0005525//GTP binding;GO:0005200//structural constituent of cytoskeleton;GO:0032550//purine ribonucleoside binding;GO:0003924//GTPase activity	GO:0044763//single-organism cellular process;GO:0009154//purine ribonucleotide catabolic process;GO:0007017//microtubule-based process;GO:0043623//cellular protein complex assembly	K07375//tubulin beta	gi|998725053|ref|XP_015500572.1|//PREDICTED: tubulin beta-4B chain isoform X1 [Parus major]
Unigene0000210	872	782.454	320.852	-1.2861	0.00302601	Down	5.55099e-05	NA	NA	NA	NA	gi|762108571|ref|XP_011436912.1|//PREDICTED: protein TBATA-like isoform X3 [Crassostrea gigas]
Unigene0009454	900	309.404	136.941	-1.17593	0.040522	Down	0.00219525	NA	NA	NA	K19404//phosphatidic acid-selective&#160;phospholipase A1 [EC:3.1.1.-]	gi|762093229|ref|XP_011429066.1|//PREDICTED: uncharacterized protein LOC105329488 [Crassostrea gigas]
Unigene0012886	304	27.404	222.049	3.01842	0.000371738	Up	3.38008e-06	NA	NA	NA	NA	NA
Unigene0019558	1360	59.7882	125.903	1.07438	0.0207614	Up	0.000831011	NA	NA	NA	K03006//DNA-directed RNA polymerase II subunit RPB1 [EC:2.7.7.6]	gi|762149313|ref|XP_011412594.1|//PREDICTED: uncharacterized protein LOC105317600 isoform X2 [Crassostrea gigas]
Unigene0009369	1624	20.9427	120.335	2.52254	3.6636e-05	Up	1.80536e-07	NA	NA	NA	K13912//deleted in malignant brain tumors 1 protein	gi|762128312|ref|XP_011447257.1|//PREDICTED: DNA repair protein RAD50-like [Crassostrea gigas]
Unigene0013815	4614	109.924	283.198	1.3653	0.0170674	Up	0.000627804	NA	NA	NA	K06760//contactin 2;K06762//contactin 4;K06763//contactin 5;K06759//contactin 1	gi|762168248|ref|XP_011422487.1|//PREDICTED: contactin-like [Crassostrea gigas]
Unigene0026365	697	636.935	317.313	-1.00524	0.0491775	Down	0.00292356	NA	NA	NA	NA	NA
Unigene0029801	486	394.732	170.706	-1.20935	0.0145676	Down	0.000489962	NA	NA	NA	K19755//radial spoke head protein 1	gi|762149043|ref|XP_011412449.1|//PREDICTED: MORN repeat-containing protein 2-like isoform X2 [Crassostrea gigas]
Unigene0025646	743	23.5799	57.0631	1.275	0.029652	Up	0.00139011	NA	NA	NA	K06238//collagen, type VI, alpha	gi|762165520|ref|XP_011421085.1|//PREDICTED: collagen alpha-1(XII) chain-like [Crassostrea gigas]
Unigene0016456	2036	667.121	1364.52	1.03237	6.01598e-06	Up	2.31428e-08	NA	NA	NA	K04284//growth hormone secretagogue receptor;K08428//G protein-coupled receptor 139;K05053//neuromedin U receptor 2;K04305//Epstein-Barr virus induced gene 2;K04282//thyrotropin-releasing hormone receptor	gi|762128464|ref|XP_011447337.1|//PREDICTED: neuromedin-U receptor 2-like [Crassostrea gigas]
Unigene0027082	649	31.8535	103.948	1.70634	0.000503157	Up	5.10291e-06	NA	NA	NA	NA	gi|762102646|ref|XP_011433822.1|//PREDICTED: uncharacterized protein LOC105332805 [Crassostrea gigas]
Unigene0025538	749	1495.39	602.831	-1.31069	0.00126489	Down	1.68409e-05	NA	NA	NA	K02981//small subunit ribosomal protein S2e	gi|762089205|ref|XP_011426944.1|//PREDICTED: uncharacterized protein C9orf135 homolog [Crassostrea gigas]
Unigene0012515	411	64.0895	133.79	1.06181	0.0290968	Up	0.00134503	NA	NA	NA	NA	gi|405970511|gb|EKC35409.1|//Diamine acetyltransferase 2 [Crassostrea gigas]
Unigene0004400	480	433.096	189.347	-1.19366	0.0037788	Down	7.85607e-05	NA	GO:0004175//endopeptidase activity;GO:0004197//cysteine-type endopeptidase activity	GO:0006508//proteolysis;GO:0019538//protein metabolic process;GO:0012501//programmed cell death;GO:0006915//apoptotic process	K04397//caspase 7 [EC:3.4.22.60]	gi|765826454|ref|NP_001292251.1|//caspase-7-like [Crassostrea gigas]
Unigene0018356	1597	855.193	369.148	-1.21205	0.00176551	Down	2.63579e-05	NA	NA	NA	K12875//apoptotic chromatin condensation inducer in the nucleus;K18626//trichohyalin	gi|762101258|ref|XP_011433102.1|//PREDICTED: coiled-coil domain-containing protein 81-like isoform X4 [Crassostrea gigas]
Unigene0012834	383	157.519	69.7513	-1.17524	0.0147342	Down	0.000497012	NA	NA	NA	NA	gi|762129178|ref|XP_011447706.1|//PREDICTED: arrestin domain-containing protein 5-like isoform X1 [Crassostrea gigas]
Unigene0013941	4220	187.014	380.813	1.02594	0.00512325	Up	0.00011834	NA	NA	NA	K04593//latrophilin 2;K04594//latrophilin 3;K04592//latrophilin 1	gi|762136575|ref|XP_011451569.1|//PREDICTED: latrophilin-3-like [Crassostrea gigas]
Unigene0020205	1282	14.3982	54.1922	1.9122	0.0254419	Up	0.00110541	NA	GO:0016813//hydrolase activity, acting on carbon-nitrogen (but not peptide) bonds, in linear amidines	GO:0044763//single-organism cellular process;GO:0044237//cellular metabolic process;GO:0044281//small molecule metabolic process;GO:1901564//organonitrogen compound metabolic process	K01476//arginase [EC:3.5.3.1]	gi|762121018|ref|XP_011443425.1|//PREDICTED: arginase, hepatic-like [Crassostrea gigas]
Unigene0004266	350	6.72403	20.9097	1.63677	0.043948	Up	0.0024711	NA	NA	NA	NA	NA
Unigene0002484	319	20.4929	67.3137	1.71578	0.0189845	Up	0.000732124	NA	NA	NA	NA	NA
Unigene0017571	1769	421.06	184.271	-1.1922	0.00363093	Down	7.29556e-05	NA	NA	NA	NA	gi|762073911|ref|XP_011436266.1|//PREDICTED: uncharacterized protein C7orf72-like isoform X1 [Crassostrea gigas]
Unigene0028900	539	115.539	48.8947	-1.24062	0.0165956	Down	0.000599789	NA	NA	NA	K17593//ankyrin repeat domain-containing protein 42	gi|762074421|ref|XP_011438957.1|//PREDICTED: ankyrin repeat domain-containing protein 42-like [Crassostrea gigas]
Unigene0031924	9542	2142.54	918.687	-1.22167	0.0044243	Down	9.76175e-05	NA	NA	NA	K17570//hydrocephalus-inducing protein	gi|762100034|ref|XP_011432460.1|//PREDICTED: hydrocephalus-inducing protein-like isoform X2 [Crassostrea gigas]
Unigene0033178	876	183.958	435.519	1.24336	0.00950956	Up	0.000266959	NA	NA	NA	NA	gi|405955889|gb|EKC22815.1|//hypothetical protein CGI_10001437 [Crassostrea gigas]
Unigene0029809	485	15.0257	48.228	1.68244	0.028355	Up	0.0012846	GO:0016020//membrane	NA	NA	NA	gi|762137775|ref|XP_011452186.1|//PREDICTED: uncharacterized protein LOC105345660 [Crassostrea gigas]
Unigene0021917	1074	345.075	720.389	1.06187	0.014133	Up	0.000472523	NA	NA	NA	NA	gi|762156321|ref|XP_011416287.1|//PREDICTED: macrophage-expressed gene 1 protein-like [Crassostrea gigas]
Unigene0033354	251	9.29228	45.5351	2.29287	0.00623431	Up	0.000153212	NA	NA	NA	NA	NA
Unigene0002999	350	27.3392	5.49887	-2.31377	0.00369435	Down	7.47118e-05	NA	NA	NA	NA	NA
Unigene0007519	773	1457.1	558.888	-1.38247	0.000453794	Down	4.45172e-06	NA	NA	NA	NA	gi|919041492|ref|XP_013404028.1|//PREDICTED: testis, prostate and placenta-expressed protein-like isoform X1 [Lingula anatina]
Unigene0022787	987	97.9876	198.627	1.01939	0.00472189	Up	0.000106285	NA	NA	NA	K09444//interferon regulatory factor 1;K10153//interferon regulatory factor 2	gi|762132797|ref|XP_011449591.1|//PREDICTED: interferon regulatory factor 1-like [Crassostrea gigas]
Unigene0029019	532	57.5564	158.558	1.46197	0.00136873	Up	1.86681e-05	NA	NA	NA	NA	gi|762097579|ref|XP_011431363.1|//PREDICTED: uncharacterized protein LOC105331034 isoform X1 [Crassostrea gigas]
Unigene0014703	3087	257.254	100.726	-1.35275	0.000229092	Down	1.83541e-06	NA	NA	NA	K00629//glycerol-3-phosphate O-acyltransferase 1/2 [EC:2.3.1.15]	gi|762087419|ref|XP_011425998.1|//PREDICTED: glycerol-3-phosphate acyltransferase 1, mitochondrial-like [Crassostrea gigas]
Unigene0033195	750	110.75	230.232	1.05579	0.0329792	Up	0.00163621	NA	NA	NA	K20478//golgin subfamily B member 1	gi|762092390|ref|XP_011428628.1|//PREDICTED: nuclear anchorage protein 1-like isoform X1 [Crassostrea gigas]
Unigene0023288	934	354.784	163.174	-1.12053	0.0264213	Down	0.0011634	NA	NA	NA	K13047//tolloid-like protein 2 [EC:3.4.24.-]	gi|762103579|ref|XP_011434314.1|//PREDICTED: tolloid-like protein 2 isoform X3 [Crassostrea gigas]
Unigene0020607	1230	5876.78	2608.08	-1.17204	0.000286641	Down	2.4514e-06	NA	NA	NA	K19755//radial spoke head protein 1	gi|762085934|ref|XP_011425286.1|//PREDICTED: radial spoke head 1 homolog [Crassostrea gigas]
Unigene0001834	1169	242.033	579.409	1.25938	6.08992e-07	Up	1.81997e-09	NA	NA	NA	K00753//glycoprotein 3-alpha-L-fucosyltransferase [EC:2.4.1.214];K13195//cold-inducible RNA-binding protein;K13187//RNA-binding protein 4	gi|762155965|ref|XP_011416096.1|//PREDICTED: scaffold attachment factor B1-like isoform X3 [Crassostrea gigas]
Unigene0001101	1160	881.787	397.318	-1.15014	0.029015	Down	0.00133451	NA	NA	NA	NA	gi|762158475|ref|XP_011417420.1|//PREDICTED: mitochondria-eating protein-like isoform X6 [Crassostrea gigas]
Unigene0017760	1724	311.096	41.5794	-2.90342	3.81691e-12	Down	4.97531e-15	NA	NA	NA	NA	NA
Unigene0022554	1011	57.9614	293.459	2.34	0.00058652	Up	6.17213e-06	NA	NA	NA	K06237//collagen, type IV, alpha	gi|762166788|ref|XP_011421708.1|//PREDICTED: collagen alpha-1(X) chain-like [Crassostrea gigas]
Unigene0029467	507	28.8741	66.1076	1.19504	0.0174497	Up	0.000646861	NA	NA	NA	NA	NA
Unigene0026416	686	7.8646	57.6478	2.87382	1.17413e-06	Up	3.83329e-09	NA	NA	NA	NA	NA
Unigene0020942	1188	133.073	50.774	-1.39006	0.0384679	Down	0.00203016	GO:0005929//cilium;GO:0030991//intraciliary transport particle A	NA	GO:0042384;GO:0035721//intraciliary retrograde transport	K19671//WD repeat-containing protein 19	gi|762122128|ref|XP_011444008.1|//PREDICTED: WD repeat-containing protein 19-like [Crassostrea gigas]
Unigene0018281	1614	225.388	103.757	-1.1192	0.0303147	Down	0.0014447	NA	NA	NA	K14018//phospholipase A-2-activating protein	gi|405977739|gb|EKC42173.1|//Phospholipase A-2-activating protein [Crassostrea gigas]
Unigene0002906	358	6.93351	27.2591	1.97508	0.00927593	Up	0.000257747	NA	NA	NA	NA	NA
Unigene0007669	258	37824.6	7206.68	-2.39192	2.2124e-10	Down	3.44654e-13	NA	NA	NA	K06233//low density lipoprotein-related protein 2	gi|405977564|gb|EKC42007.1|//Low-density lipoprotein receptor [Crassostrea gigas]
Unigene0016004	2274	31.3322	87.2886	1.47815	0.0310665	Up	0.00149342	NA	NA	NA	K05641//ATP-binding cassette, subfamily A (ABC1), member 1	gi|762127218|ref|XP_011446686.1|//PREDICTED: ATP-binding cassette sub-family A member 1-like isoform X2 [Crassostrea gigas]
Unigene0016922	1945	860.374	393.106	-1.13005	0.00179731	Down	2.7142e-05	NA	NA	NA	K14951//cation-transporting ATPase 13A3/4/5 [EC:3.6.3.-];K14963//COMPASS component SWD3	gi|762170244|ref|XP_011423544.1|//PREDICTED: WD repeat-containing protein 5-like [Crassostrea gigas]
Unigene0016882	1958	2081.6	943.568	-1.14149	0.0191009	Down	0.000738433	NA	NA	NA	K18488//homeobox protein DLX2;K09314//homeobox protein DLX1/4/6	gi|762117429|ref|XP_011441569.1|//PREDICTED: homeobox protein Dlx6a-like [Crassostrea gigas]
Unigene0026066	717	42.5937	7.51042	-2.50368	0.00520586	Down	0.000121523	NA	NA	NA	K18271//retinol-binding protein 4	gi|762094555|ref|XP_011429761.1|//PREDICTED: retinol-binding protein 4-B-like [Crassostrea gigas]
Unigene0030871	1894	5268.52	2434.26	-1.11391	0.0085884	Down	0.000230498	NA	NA	NA	NA	gi|762151785|ref|XP_011413886.1|//PREDICTED: uncharacterized protein LOC105318449 isoform X1 [Crassostrea gigas]
Unigene0009949	1070	285.462	110.355	-1.37114	0.000249075	Down	2.01927e-06	NA	NA	NA	K17593//ankyrin repeat domain-containing protein 42	gi|762074421|ref|XP_011438957.1|//PREDICTED: ankyrin repeat domain-containing protein 42-like [Crassostrea gigas]
Unigene0017356	1819	347.074	892.989	1.3634	7.69363e-05	Up	4.62293e-07	NA	NA	NA	NA	gi|405964262|gb|EKC29765.1|//hypothetical protein CGI_10015342 [Crassostrea gigas]
Unigene0018816	1502	568.115	170.618	-1.73542	3.11585e-09	Down	6.33987e-12	NA	NA	NA	NA	gi|405964400|gb|EKC29893.1|//hypothetical protein CGI_10023469 [Crassostrea gigas]
Unigene0020452	1252	84.0853	194.722	1.21149	0.0310202	Up	0.00148917	NA	NA	NA	NA	gi|762094780|ref|XP_011429879.1|//PREDICTED: uncharacterized protein LOC105330030 [Crassostrea gigas]
Unigene0013833	4571	573.876	142.919	-2.00554	0.0304857	Down	0.00145576	NA	NA	NA	K06467//CD22 antigen;K17341//hemicentin	gi|762099945|ref|XP_011432414.1|//PREDICTED: basement membrane-specific heparan sulfate proteoglycan core protein-like [Crassostrea gigas]
Unigene0023912	880	92.8731	189.533	1.02912	0.00848144	Up	0.000225963	NA	NA	NA	NA	gi|405959661|gb|EKC25673.1|//Protein yellow [Crassostrea gigas]
Unigene0011494	311	663.454	177.851	-1.89932	0.000157775	Down	1.0935e-06	NA	NA	NA	NA	NA
Unigene0031979	1413	244.697	102.446	-1.25613	0.0171403	Down	0.000633158	NA	NA	NA	K00820//glucosamine--fructose-6-phosphate aminotransferase (isomerizing) [EC:2.6.1.16]	gi|762127172|ref|XP_011446661.1|//PREDICTED: glutamine--fructose-6-phosphate aminotransferase [isomerizing] 1-like isoform X6 [Crassostrea gigas]
Unigene0014491	3317	237.364	82.2818	-1.52846	0.000591776	Down	6.33843e-06	GO:0030286//dynein complex	GO:0005524//ATP binding;GO:0003777//microtubule motor activity;GO:0016887//ATPase activity	GO:0007018//microtubule-based movement	K10408//dynein heavy chain, axonemal	gi|762087169|ref|XP_011425868.1|//PREDICTED: dynein heavy chain 6, axonemal-like isoform X3 [Crassostrea gigas]
Unigene0031781	490	1473.62	3697.42	1.32715	0.00656329	Up	0.000162548	NA	NA	NA	NA	NA
Unigene0018155	1638	236844	67307.6	-1.8151	0.0016134	Down	2.32874e-05	GO:0032991//macromolecular complex;GO:0015630//microtubule cytoskeleton	GO:0017111//nucleoside-triphosphatase activity;GO:0005198//structural molecule activity;GO:0032550//purine ribonucleoside binding	GO:0044763//single-organism cellular process;GO:0009154//purine ribonucleotide catabolic process;GO:0043623//cellular protein complex assembly	K07374//tubulin alpha	gi|762092848|ref|XP_011428863.1|//PREDICTED: tubulin alpha-1A chain [Crassostrea gigas]
Unigene0013517	7349	722.683	346.452	-1.06071	0.0256548	Down	0.00112312	GO:0030286//dynein complex;GO:0005858//axonemal dynein complex	GO:0003774//motor activity;GO:0003777//microtubule motor activity;GO:0016887//ATPase activity	GO:0003341//cilium movement;GO:0048870//cell motility;GO:0009154//purine ribonucleotide catabolic process	K10408//dynein heavy chain, axonemal	gi|762084797|ref|XP_011424900.1|//PREDICTED: dynein heavy chain 1, axonemal-like isoform X6 [Crassostrea gigas]
Unigene0019888	1325	30.1659	9.15054	-1.72099	0.0178413	Down	0.000669319	NA	NA	NA	K17495//CUB and sushi domain-containing protein;K06051//delta	gi|405964402|gb|EKC29895.1|//hypothetical protein CGI_10023471 [Crassostrea gigas]
Unigene0004861	251	8.08956	66.3391	3.03573	0.000186357	Up	1.37221e-06	NA	NA	NA	NA	NA
Unigene0028181	583	220.732	556.002	1.33279	0.0340876	Up	0.00172529	NA	NA	NA	NA	gi|405978244|gb|EKC42650.1|//hypothetical protein CGI_10013279 [Crassostrea gigas]
Unigene0014639	3150	122.785	291.801	1.24885	0.0276602	Up	0.00124169	NA	NA	NA	K08635//membrane metallo-endopeptidase-like 1	gi|762126740|ref|XP_011446433.1|//PREDICTED: endothelin-converting enzyme 1-like isoform X1 [Crassostrea gigas]
Unigene0017372	1811	3.5509	15.5461	2.13029	0.025505	Up	0.00111089	NA	NA	NA	NA	gi|762126653|ref|XP_011446389.1|//PREDICTED: uncharacterized protein LOC105341524 [Crassostrea gigas]
Unigene0007443	511	30.6463	64.4718	1.07296	0.0379839	Up	0.00199375	NA	NA	NA	K15208//snRNA-activating protein complex subunit 1	gi|405954569|gb|EKC21973.1|//snRNA-activating protein complex subunit 1 [Crassostrea gigas]
Unigene0015614	2474	4462.59	2214.06	-1.01119	0.0138836	Down	0.000458166	NA	NA	NA	K14556//U3 small nucleolar RNA-associated protein 12;K18598//echinoderm microtubule-associated protein-like 6	gi|405967052|gb|EKC32266.1|//WD repeat-containing protein 16 [Crassostrea gigas]
Unigene0006123	1820	68.9498	237.111	1.78194	1.12793e-05	Up	4.66176e-08	NA	NA	NA	K12812//ATP-dependent RNA helicase UAP56/SUB2 [EC:3.6.4.13]	gi|762153782|ref|XP_011414938.1|//PREDICTED: spliceosome RNA helicase DDX39B-like isoform X2 [Crassostrea gigas]
Unigene0016531	2064	3.65088	758.757	7.69925	7.65398e-64	Up	2.43339e-68	NA	NA	NA	NA	NA
Unigene0026919	659	59.24	25.7943	-1.19952	0.036615	Down	0.00190911	NA	NA	NA	NA	gi|762159794|ref|XP_011418092.1|//PREDICTED: uncharacterized protein LOC105321507 [Crassostrea gigas]
Unigene0002210	439	48.3015	114.303	1.24273	0.0352421	Up	0.00180838	NA	NA	NA	NA	gi|762093530|ref|XP_011429223.1|//PREDICTED: FMRFamide receptor-like [Crassostrea gigas]
Unigene0015472	2539	94.718	332.178	1.81024	0.00202315	Up	3.17746e-05	NA	NA	NA	NA	gi|762072466|ref|XP_011430496.1|//PREDICTED: uncharacterized threonine-rich GPI-anchored glycoprotein PJ4664.02-like [Crassostrea gigas]
Unigene0010371	368	50.7069	134.257	1.40474	0.00898438	Up	0.000244963	NA	NA	NA	NA	gi|762141436|ref|XP_011453904.1|//PREDICTED: basement membrane-specific heparan sulfate proteoglycan core protein-like isoform X1 [Crassostrea gigas]
Unigene0022647	1002	356.632	821.614	1.20403	0.00108948	Up	1.35778e-05	NA	NA	NA	NA	gi|762125548|ref|XP_011445803.1|//PREDICTED: uncharacterized protein LOC105341146 isoform X3 [Crassostrea gigas]
Unigene0004373	449	492.284	221.645	-1.15124	0.00349761	Down	6.91648e-05	NA	GO:0033743//peptide-methionine (R)-S-oxide reductase activity	GO:0006979//response to oxidative stress;GO:0030091//protein repair;GO:0055114//oxidation-reduction process	K07305//peptide-methionine (R)-S-oxide reductase [EC:1.8.4.12]	gi|762104490|ref|XP_011434784.1|//PREDICTED: methionine-R-sulfoxide reductase B3, mitochondrial-like isoform X2 [Crassostrea gigas]
Unigene0028366	571	384.868	98.119	-1.97176	0.0002519	Down	2.0662e-06	NA	NA	NA	K06252//tenascin	gi|762086714|ref|XP_011425638.1|//PREDICTED: microfibril-associated glycoprotein 4-like isoform X4 [Crassostrea gigas]
Unigene0020438	1252	96.2263	41.4811	-1.21398	0.0103051	Down	0.000298795	NA	NA	NA	NA	gi|762107395|ref|XP_011436299.1|//PREDICTED: cilia- and flagella-associated protein 46-like, partial [Crassostrea gigas]
Unigene0021475	1116	16.4946	62.1944	1.91479	0.00311797	Up	5.80588e-05	NA	NA	NA	NA	gi|405974773|gb|EKC39395.1|//Arrestin domain-containing protein 2 [Crassostrea gigas]
Unigene0032808	399	2.23564	14.3079	2.67806	0.00242781	Up	4.00594e-05	NA	NA	NA	NA	NA
Unigene0032192	1371	157.642	423.595	1.42603	5.18663e-05	Up	2.85269e-07	NA	NA	NA	NA	gi|405957331|gb|EKC23550.1|//Interferon-induced protein 44-like protein [Crassostrea gigas]
Unigene0022033	1061	79.6659	25.834	-1.62469	0.0059057	Down	0.000142883	NA	NA	NA	K20049//low-density lipoprotein receptor-related protein 1B	gi|762132225|ref|XP_011449295.1|//PREDICTED: low-density lipoprotein receptor 1-like [Crassostrea gigas]
Unigene0009353	1194	278.408	577.294	1.05211	0.000813827	Up	9.54734e-06	GO:0031224//intrinsic component of membrane;GO:0005740//mitochondrial envelope	NA	GO:0044765//single-organism transport	K15116//solute carrier family 25, member 33/36	gi|405945561|gb|EKC17383.1|//Solute carrier family 25 member 36 [Crassostrea gigas]
Unigene0002136	423	239.312	520.425	1.1208	0.00256409	Up	4.38173e-05	NA	NA	NA	NA	NA
Unigene0009385	1953	104.896	42.1522	-1.31528	0.0017044	Down	2.50886e-05	NA	NA	NA	K19636//usherin	gi|762108463|ref|XP_011436857.1|//PREDICTED: uncharacterized protein LOC105334930 isoform X6 [Crassostrea gigas]
Unigene0010975	293	74.7793	25.0188	-1.57963	0.00328126	Down	6.28002e-05	NA	NA	NA	NA	gi|676438458|ref|XP_009048536.1|//hypothetical protein LOTGIDRAFT_200713 [Lottia gigantea]
Unigene0030559	326	3.3421	13.3273	1.99555	0.0370575	Up	0.00193806	NA	NA	NA	NA	gi|260789732|ref|XP_002589899.1|//hypothetical protein BRAFLDRAFT_195927 [Branchiostoma floridae]
Unigene0025689	743	4.00958	213.331	5.7335	2.86927e-28	Up	1.18588e-31	NA	NA	NA	NA	NA
Unigene0022782	984	203.597	88.3838	-1.20386	0.00898438	Down	0.000245075	NA	NA	NA	K08202//MFS transporter, OCT family, solute carrier family 22 (organic cation transporter), member 4/5	gi|762118074|ref|XP_011441912.1|//PREDICTED: organic cation transporter protein-like [Crassostrea gigas]
Unigene0030410	402	75.7216	192.107	1.34313	0.000361	Up	3.26934e-06	NA	NA	NA	NA	gi|405953955|gb|EKC21515.1|//hypothetical protein CGI_10003801 [Crassostrea gigas]
Unigene0018223	1628	30.4411	102.326	1.74908	0.0389484	Up	0.00207905	NA	NA	NA	NA	NA
Unigene0003143	831	264.588	100.842	-1.39166	0.000737236	Down	8.43788e-06	NA	NA	NA	K12657//delta-1-pyrroline-5-carboxylate synthetase [EC:2.7.2.11 1.2.1.41]	gi|762146020|ref|XP_011456300.1|//PREDICTED: delta-1-pyrroline-5-carboxylate synthase-like [Crassostrea gigas]
Unigene0001117	345	66.6546	26.8374	-1.31246	0.0318954	Down	0.00155958	NA	NA	NA	NA	gi|762122339|ref|XP_011444123.1|//PREDICTED: uncharacterized protein LOC105339998 isoform X2 [Crassostrea gigas]
Unigene0005317	381	24486.2	10643.1	-1.20205	1.16716e-05	Down	4.89811e-08	NA	NA	NA	K16642//pleiotrophin	gi|762135843|ref|XP_011451176.1|//PREDICTED: uncharacterized protein LOC105344949 [Crassostrea gigas]
Unigene0027085	649	64.5069	25.0358	-1.36546	0.036615	Down	0.00191026	NA	NA	NA	NA	gi|762159794|ref|XP_011418092.1|//PREDICTED: uncharacterized protein LOC105321507 [Crassostrea gigas]
Unigene0001810	2640	191.099	401.222	1.07008	0.0163884	Up	0.000587718	GO:0032982//myosin filament;GO:0030016//myofibril	GO:0003779//actin binding;GO:0005524//ATP binding;GO:0003774//motor activity;GO:0005516//calmodulin binding	NA	K17751//myosin heavy chain 6/7	gi|762119233|ref|XP_011442518.1|//PREDICTED: myosin heavy chain, striated muscle-like isoform X4 [Crassostrea gigas]
Unigene0002173	798	445.54	209.902	-1.08584	0.0135422	Down	0.000443886	NA	NA	NA	NA	gi|762078858|ref|XP_011456172.1|//PREDICTED: sperm-associated antigen 17-like isoform X1 [Crassostrea gigas]
Unigene0017942	1683	591.725	1597.02	1.43239	0.0030316	Up	5.59015e-05	NA	NA	NA	K09228//KRAB domain-containing zinc finger protein;K08819//cyclin-dependent kinase 12/13 [EC:2.7.11.22 2.7.11.23]	gi|762134696|ref|XP_011450578.1|//PREDICTED: uncharacterized protein LOC105344497 [Crassostrea gigas]
Unigene0026891	659	54.2138	153.673	1.50314	0.000110842	Up	7.01261e-07	NA	NA	NA	K05312//nicotinic acetylcholine receptor, invertebrate;K04815//nicotinic acetylcholine receptor beta-4	gi|762111301|ref|XP_011438360.1|//PREDICTED: neuronal acetylcholine receptor subunit alpha-10-like isoform X2 [Crassostrea gigas]
Unigene0004483	420	6.59678	29.7048	2.17086	0.0192905	Up	0.000749444	NA	NA	NA	NA	gi|762096508|ref|XP_011430790.1|//PREDICTED: mucin-4-like [Crassostrea gigas]
Unigene0004279	272	15.8926	72.9484	2.19852	0.00202315	Up	3.17548e-05	NA	NA	NA	NA	NA
Unigene0004280	473	94.6042	307.773	1.70189	0.00124144	Up	1.62215e-05	NA	NA	NA	NA	NA
Unigene0001193	917	49.3207	19.6463	-1.32793	0.0209261	Down	0.000841595	NA	NA	NA	K11802//WD repeat-containing protein 32	gi|405963328|gb|EKC28911.1|//WD repeat-containing protein 32 [Crassostrea gigas]
Unigene0014135	3804	143.438	55.7224	-1.3641	0.0338279	Down	0.00170355	NA	GO:0016881//acid-amino acid ligase activity	GO:0006464//cellular protein modification process;GO:0036211//protein modification process	K16600//tubulin polyglutamylase TTLL2 [EC:6.-.-.-]	gi|762093261|ref|XP_011429082.1|//PREDICTED: tubulin polyglutamylase TTLL13-like [Crassostrea gigas]
Unigene0015888	2328	3816.29	1635.81	-1.22216	0.0177794	Down	0.000664737	NA	NA	GO:0009987//cellular process	K17102//ETS homologous factor;K09429//E74-like factor 3	gi|405962560|gb|EKC28224.1|//ETS-related transcription factor Elf-3 [Crassostrea gigas]
Unigene0010660	1163	112.047	251.433	1.16608	0.0246182	Up	0.00105686	NA	NA	NA	K01128//sphingomyelin phosphodiesterase acid-like 3 [EC:3.1.4.-]	gi|762148405|ref|XP_011412125.1|//PREDICTED: XK-related protein 6-like isoform X1 [Crassostrea gigas]
Unigene0025175	779	112.841	358.941	1.66946	0.00194934	Up	3.02434e-05	NA	NA	NA	NA	gi|762082404|ref|XP_011424013.1|//PREDICTED: E3 ubiquitin-protein ligase RNF213-like [Crassostrea gigas]
Unigene0006810	1979	133.897	652.644	2.28517	4.08551e-23	Up	2.07822e-26	NA	NA	NA	K08106//N-acetylgalactosamine 4-sulfate 6-O-sulfotransferase [EC:2.8.2.33]	gi|405969447|gb|EKC34418.1|//Carbohydrate sulfotransferase 15 [Crassostrea gigas]
Unigene0014864	2930	1391.08	514.863	-1.43394	0.00114882	Down	1.47191e-05	NA	NA	NA	K10056//junction plakoglobin;K08332	gi|405956905|gb|EKC23148.1|//Armadillo repeat-containing protein 3 [Crassostrea gigas]
Unigene0004434	624	571.871	242.476	-1.23785	0.000219189	Down	1.70204e-06	NA	NA	NA	K00161//pyruvate dehydrogenase E1 component alpha subunit [EC:1.2.4.1]	gi|762101445|ref|XP_011433203.1|//PREDICTED: pyruvate dehydrogenase E1 component subunit alpha, somatic form, mitochondrial-like isoform X1 [Crassostrea gigas]
Unigene0003207	566	129.282	45.1989	-1.51616	0.0197284	Down	0.000777117	NA	NA	NA	NA	gi|762146452|ref|XP_011456523.1|//PREDICTED: uncharacterized protein LOC105348695 [Crassostrea gigas]
Unigene0025159	781	213.753	103.443	-1.0471	0.0079074	Down	0.000205893	NA	NA	NA	NA	gi|762115637|ref|XP_011440628.1|//PREDICTED: uncharacterized protein LOC105337560 isoform X1 [Crassostrea gigas]
Unigene0029169	525	13.37	42.2669	1.66053	0.0408112	Up	0.00221705	NA	NA	NA	NA	gi|405976775|gb|EKC41263.1|//hypothetical protein CGI_10004709 [Crassostrea gigas]
Unigene0029375	513	34.5318	76.3626	1.14494	0.0486305	Up	0.00286644	NA	NA	NA	K11997//tripartite motif-containing protein 2/3;K12035//tripartite motif-containing protein 71 [EC:2.3.2.27]	gi|405947092|gb|EKC17768.1|//Tripartite motif-containing protein 2 [Crassostrea gigas]
Unigene0009940	775	142.179	414.494	1.54365	0.00299647	Up	5.48728e-05	NA	NA	NA	NA	gi|762106353|ref|XP_011435763.1|//PREDICTED: uncharacterized protein LOC105334125 [Crassostrea gigas]
Unigene0031827	611	1.88606	16.5937	3.13719	0.000145777	Up	1.00108e-06	NA	NA	NA	NA	NA
Unigene0012575	343	17.3087	45.5522	1.39602	0.0288353	Up	0.00132252	GO:0043231//intracellular membrane-bounded organelle;GO:0044444//cytoplasmic part	GO:0043169//cation binding;GO:0016301//kinase activity;GO:0032550//purine ribonucleoside binding	GO:0009108//coenzyme biosynthetic process;GO:0006771//riboflavin metabolic process	K00861//riboflavin kinase [EC:2.7.1.26]	gi|762102430|ref|XP_011433707.1|//PREDICTED: riboflavin kinase-like [Crassostrea gigas]
Unigene0029453	507	286.649	126.575	-1.17929	0.00881617	Down	0.000237964	NA	NA	NA	NA	gi|762078874|ref|XP_011456241.1|//PREDICTED: sperm-associated antigen 17-like isoform X9 [Crassostrea gigas]
Unigene0001783	380	255.247	524.892	1.04012	0.00390412	Up	8.22926e-05	NA	NA	NA	NA	NA
Unigene0026243	700	174.888	27.6541	-2.66087	0.000194137	Down	1.4813e-06	NA	NA	NA	K00545//catechol O-methyltransferase [EC:2.1.1.6]	gi|762114637|ref|XP_011440108.1|//PREDICTED: probable caffeoyl-CoA O-methyltransferase 1 [Crassostrea gigas]
Unigene0002227	369	24.4921	56.3125	1.20114	0.0402217	Up	0.00217131	NA	NA	NA	NA	NA
Unigene0025968	723	75.1542	181.852	1.27484	0.00933631	Up	0.000260908	NA	NA	NA	NA	gi|405951331|gb|EKC19253.1|//hypothetical protein CGI_10009106 [Crassostrea gigas]
Unigene0014336	3514	1787.78	791.979	-1.17463	0.00310843	Down	5.77135e-05	NA	NA	NA	NA	gi|762122296|ref|XP_011444099.1|//PREDICTED: tetratricopeptide repeat protein 18-like isoform X13 [Crassostrea gigas]
Unigene0000841	945	208.392	55.5847	-1.90654	0.000591776	Down	6.30984e-06	NA	NA	NA	NA	gi|762098957|ref|XP_011431886.1|//PREDICTED: proteoglycan 4-like [Crassostrea gigas]
Unigene0004004	302	22.5011	66.6224	1.56601	0.0152414	Up	0.000522841	NA	NA	NA	NA	NA
Unigene0018835	1499	108.889	44.2425	-1.29935	0.0473019	Down	0.00274752	NA	NA	NA	NA	gi|762097071|ref|XP_011431092.1|//PREDICTED: uncharacterized protein LOC105330858 isoform X3 [Crassostrea gigas]
Unigene0015808	2363	677.09	222.654	-1.60454	0.000825694	Down	9.71282e-06	GO:0031224//intrinsic component of membrane	NA	GO:0051234//establishment of localization	K15100//solute carrier family 25 (mitochondrial citrate transporter), member 1	gi|970899299|ref|XP_015115298.1|//PREDICTED: putative tricarboxylate transport protein, mitochondrial isoform X1 [Diachasma alloeum]
Unigene0028379	570	53.056	223.285	2.0733	0.000219472	Up	1.71963e-06	NA	GO:0046872//metal ion binding;GO:0005509//calcium ion binding	NA	K02183//calmodulin	gi|167534692|ref|XP_001749021.1|//hypothetical protein [Monosiga brevicollis MX1]
Unigene0030912	870	2811.43	922.705	-1.60737	6.84627e-05	Down	3.96141e-07	NA	NA	NA	K18630//tektin-3	gi|762135468|ref|XP_011450984.1|//PREDICTED: tektin-3-like isoform X2 [Crassostrea gigas]
Unigene0033204	527	599.953	1523.7	1.34466	0.0179987	Up	0.00068021	GO:0044424//intracellular part	GO:0033218//amide binding;GO:0043565//sequence-specific DNA binding;GO:0046914//transition metal ion binding	GO:0003006//developmental process involved in reproduction;GO:0044767//single-organism developmental process;GO:0010224//response to UV-B;GO:0046677//response to antibiotic;GO:0002376//immune system process;GO:0010467//gene expression;GO:0012501//programmed cell death;GO:0010038//response to metal ion	K09851//Ras association domain-containing protein 2/4	gi|405953035|gb|EKC20769.1|//Cysteine-rich protein 1 [Crassostrea gigas]
Unigene0009317	1925	217.35	479.687	1.14207	0.0388034	Up	0.00207007	NA	NA	NA	NA	gi|762094398|ref|XP_011429681.1|//PREDICTED: uncharacterized protein LOC105329895 isoform X1 [Crassostrea gigas]
Unigene0000337	733	141.515	341.433	1.27064	0.00256409	Up	4.38571e-05	NA	NA	NA	NA	gi|762135988|ref|XP_011451251.1|//PREDICTED: protein Hook homolog 1-like [Crassostrea gigas]
Unigene0010299	1160	106.859	43.0382	-1.31202	0.000615083	Down	6.72692e-06	NA	NA	NA	K14429//solute carrier family 12 (potassium/chloride transporters), member 9	gi|762082007|ref|XP_011423128.1|//PREDICTED: solute carrier family 12 member 9-like isoform X2 [Crassostrea gigas]
Unigene0031902	614	165.525	72.1418	-1.19814	0.0113553	Down	0.000341216	NA	NA	NA	NA	gi|762110274|ref|XP_011437822.1|//PREDICTED: uncharacterized protein LOC105335571 [Crassostrea gigas]
Unigene0028830	544	2902.69	483.424	-2.58603	0.00357802	Down	7.17788e-05	NA	NA	NA	K17101//E74-like factor 5	gi|762095574|ref|XP_011430293.1|//PREDICTED: ETS-related transcription factor Elf-5-like [Crassostrea gigas]
Unigene0018887	1484	26.0082	80.3346	1.62706	0.0030896	Up	5.71675e-05	NA	NA	NA	K19031//cell migration-inducing and hyaluronan-binding protein [EC:3.2.1.35]	gi|762121724|ref|XP_011443799.1|//PREDICTED: cell migration-inducing and hyaluronan-binding protein-like [Crassostrea gigas]
Unigene0016014	2246	89.5365	357.538	1.99755	3.89061e-05	Up	1.95434e-07	NA	NA	NA	K10104//ficolin;K06252//tenascin	gi|762109672|ref|XP_011437498.1|//PREDICTED: angiopoietin-4-like [Crassostrea gigas]
Unigene0025765	736	29.9917	94.662	1.65822	0.0287485	Up	0.00130883	NA	NA	NA	NA	NA
Unigene0002121	692	28.9475	98.4321	1.76569	0.00168976	Up	2.47119e-05	NA	NA	NA	NA	gi|762097622|ref|XP_011431386.1|//PREDICTED: uncharacterized protein LOC105331053 [Crassostrea gigas]
Unigene0008391	780	193.95	79.1568	-1.2929	0.0169886	Down	0.000618964	NA	NA	NA	K02649//phosphoinositide-3-kinase regulatory subunit alpha/beta/delta	gi|762160165|ref|XP_011418293.1|//PREDICTED: phosphatidylinositol 3-kinase regulatory subunit alpha-like isoform X1 [Crassostrea gigas]
Unigene0018103	1646	208.191	44.05	-2.24069	0.000261379	Down	2.15226e-06	NA	NA	NA	NA	gi|762098869|ref|XP_011431837.1|//PREDICTED: uncharacterized protein LOC105331390 [Crassostrea gigas]
Unigene0011764	366	31.6769	96.4502	1.60635	0.0288003	Up	0.00131302	NA	NA	NA	NA	NA
Unigene0002539	575	1998.15	936.819	-1.09283	0.0103845	Down	0.000301427	NA	NA	NA	NA	gi|762075498|ref|XP_011442493.1|//PREDICTED: uncharacterized protein LOC105338894 [Crassostrea gigas]
Unigene0025917	720	5.24787	21.4684	2.03241	0.0360706	Up	0.00186875	NA	NA	NA	NA	NA
Unigene0001833	501	16.7576	63.8543	1.92997	0.000123201	Up	8.02958e-07	NA	NA	NA	NA	NA
Unigene0033214	363	24.1532	58.9303	1.28679	0.015283	Up	0.000527183	NA	NA	NA	NA	NA
Unigene0025433	761	6.1103	25.827	2.07957	0.0197092	Up	0.000775111	NA	NA	NA	NA	gi|762137773|ref|XP_011452184.1|//PREDICTED: uncharacterized protein LOC105345659 [Crassostrea gigas]
Unigene0015367	2585	2016.12	661.421	-1.60794	5.83136e-18	Down	4.26404e-21	NA	NA	NA	NA	NA
Unigene0001143	401	11.6527	1.99105	-2.54907	0.00431121	Down	9.39413e-05	NA	NA	NA	NA	NA
Unigene0032179	1241	766.292	277.553	-1.46513	3.3218e-09	Down	6.86453e-12	NA	NA	NA	NA	NA
Unigene0011842	371	164.881	69.0354	-1.25602	0.0226639	Down	0.000940306	NA	NA	NA	K17571//protein phosphatase 1 regulatory subunit 32	gi|762118866|ref|XP_011442327.1|//PREDICTED: protein phosphatase 1 regulatory subunit 32-like isoform X2 [Crassostrea gigas]
Unigene0018424	1585	267.732	133.72	-1.00157	0.000386888	Down	3.60393e-06	GO:0016020//membrane	NA	GO:0006631//fatty acid metabolic process	K10203//elongation of very long chain fatty acids protein 6 [EC:2.3.1.199]	gi|762073755|ref|XP_011435394.1|//PREDICTED: elongation of very long chain fatty acids protein 6-like [Crassostrea gigas]
Unigene0015624	2451	147.344	62.035	-1.24803	0.0151773	Down	0.000519196	NA	NA	NA	NA	gi|762107864|ref|XP_011436551.1|//PREDICTED: uncharacterized protein LOC105334697 [Crassostrea gigas]
Unigene0029511	503	128.139	52.3459	-1.29156	0.0450697	Down	0.00256915	NA	NA	NA	K06760//contactin 2;K06762//contactin 4;K06763//contactin 5;K06759//contactin 1	gi|762091525|ref|XP_011428164.1|//PREDICTED: uncharacterized protein LOC105328830 [Crassostrea gigas]
Unigene0016839	1972	181.55	88.6971	-1.0334	0.00921264	Down	0.000253938	NA	NA	NA	NA	gi|762100825|ref|XP_011432874.1|//PREDICTED: vasohibin-2-like isoform X2 [Crassostrea gigas]
Unigene0012033	355	337.608	1438.92	2.09157	4.01131e-10	Up	6.75905e-13	NA	NA	NA	K06560//mannose receptor, C type;K17513//C-type lectin superfamily 17 member A	gi|762167211|ref|XP_011421928.1|//PREDICTED: perlucin-like protein [Crassostrea gigas]
Unigene0016074	2240	2583.33	1079.75	-1.25853	0.00320634	Down	6.04489e-05	NA	NA	NA	K10402//kinesin family member 20;K10397//kinesin family member 6/9;K16469//rootletin	gi|762126431|ref|XP_011446272.1|//PREDICTED: IQ domain-containing protein D-like [Crassostrea gigas]
Unigene0027693	609	3.79613	25.6578	2.7568	0.000447363	Up	4.36639e-06	NA	NA	NA	K10105//lipoyltransferase 1;K02599//Notch 1;K04365//B-Raf proto-oncogene serine/threonine-protein kinase [EC:2.7.11.1]	gi|762148905|ref|XP_011412378.1|//PREDICTED: hemagglutinin/amebocyte aggregation factor-like [Crassostrea gigas]
Unigene0012070	658	10.7913	31.4632	1.54379	0.043948	Up	0.00247098	NA	NA	NA	K00512//steroid 17alpha-monooxygenase / 17alpha-hydroxyprogesterone deacetylase [EC:1.14.14.19 1.14.14.32];K07419//vitamin D 25-hydroxylase [EC:1.14.14.24]	gi|762102135|ref|XP_011433558.1|//PREDICTED: cytochrome P450 2C31-like [Crassostrea gigas]
Unigene0019594	1366	2995.41	1234.04	-1.27937	0.00410568	Down	8.81074e-05	NA	NA	NA	NA	gi|762151787|ref|XP_011413887.1|//PREDICTED: uncharacterized protein LOC105318449 isoform X2 [Crassostrea gigas]
Unigene0014305	3562	380.066	157.002	-1.27546	0.0290686	Down	0.00134281	NA	NA	NA	NA	gi|762097071|ref|XP_011431092.1|//PREDICTED: uncharacterized protein LOC105330858 isoform X3 [Crassostrea gigas]
Unigene0015293	2627	650.703	324.39	-1.00427	0.0069215	Down	0.000173449	NA	NA	NA	K16175//protein scribble	gi|762159177|ref|XP_011417788.1|//PREDICTED: leucine-rich repeat-containing protein 58-like [Crassostrea gigas]
Unigene0008269	2749	403.041	183.238	-1.13721	0.00732951	Down	0.000187899	GO:0016020//membrane;GO:0005875//microtubule associated complex;GO:0072372;GO:0044444//cytoplasmic part;GO:0005930//axoneme	GO:0003774//motor activity;GO:0032550//purine ribonucleoside binding	GO:0009855//determination of bilateral symmetry;GO:0003002//regionalization;GO:0007420//brain development;GO:0006996//organelle organization;GO:0035108//limb morphogenesis;GO:0010927//cellular component assembly involved in morphogenesis;GO:0048870//cell motility;GO:0051604//protein maturation;GO:0008104//protein localization;GO:0002478//antigen processing and presentation of exogenous peptide an…	K10414//dynein heavy chain 2, cytosolic	gi|762095937|ref|XP_011430487.1|//PREDICTED: cytoplasmic dynein 2 heavy chain 1-like isoform X5 [Crassostrea gigas]
Unigene0015866	2337	613.894	303.007	-1.01864	0.0132686	Down	0.000429855	NA	NA	NA	NA	gi|762139238|ref|XP_011452960.1|//PREDICTED: uncharacterized protein LOC105346173 isoform X2 [Crassostrea gigas]
Unigene0015116	2746	1358.94	410.306	-1.72771	5.83751e-11	Down	8.90827e-14	GO:0016020//membrane	NA	NA	K14343//solute carrier family 10 (sodium/bile acid cotransporter), member 3/5	gi|405968995|gb|EKC34011.1|//Ileal sodium/bile acid cotransporter [Crassostrea gigas]
Unigene0029524	505	68.1456	138.681	1.02507	0.0496052	Up	0.00295858	NA	NA	NA	K18171//COX assembly mitochondrial protein 1	gi|762078058|ref|XP_011451961.1|//PREDICTED: uncharacterized protein LOC105345516 [Crassostrea gigas]
Unigene0009486	1776	1808.08	858.321	-1.07487	0.00888751	Down	0.000241303	NA	NA	NA	K16794//platelet-activating factor acetylhydrolase IB subunit alpha	gi|762115073|ref|XP_011440339.1|//PREDICTED: sperm-associated antigen 16 protein-like isoform X2 [Crassostrea gigas]
Unigene0002485	833	52.2298	205.896	1.97897	1.07008e-06	Up	3.40205e-09	NA	NA	NA	NA	NA
Unigene0019948	1312	52.0191	145.586	1.48476	0.0485305	Up	0.00285592	NA	NA	NA	K06776//receptor-type tyrosine-protein phosphatase kappa [EC:3.1.3.48];K18032//receptor-type tyrosine-protein phosphatase A [EC:3.1.3.48]	gi|762116641|ref|XP_011441160.1|//PREDICTED: uncharacterized protein LOC105337920 [Crassostrea gigas]
Unigene0010898	1065	191.337	53.0939	-1.8495	3.39482e-05	Down	1.64053e-07	NA	NA	NA	NA	gi|762089793|ref|XP_011427252.1|//PREDICTED: uncharacterized protein LOC105328182 [Crassostrea gigas]
Unigene0016872	1956	908.754	446.733	-1.02448	0.00178549	Down	2.68499e-05	NA	NA	NA	K01689//enolase [EC:4.2.1.11]	gi|762165514|ref|XP_011421082.1|//PREDICTED: enolase-like protein ENO4 [Crassostrea gigas]
Unigene0019822	1333	318.161	122.168	-1.38089	0.01905	Down	0.000735861	NA	NA	NA	NA	gi|405973903|gb|EKC38592.1|//Spermatogenesis-associated protein 6 [Crassostrea gigas]
Unigene0033055	618	225.131	84.8666	-1.4075	0.00351902	Down	6.99239e-05	NA	NA	NA	K08273//SH2 domain protein 2A;K08834//myosin III [EC:2.7.11.1]	gi|762086832|ref|XP_011425697.1|//PREDICTED: myosin-IIIb-like isoform X1 [Crassostrea gigas]
Unigene0030286	430	764.994	3368.32	2.13851	7.9624e-05	Up	4.86037e-07	NA	NA	GO:0006952//defense response;GO:0006950//response to stress	NA	gi|229473010|gb|ACQ73009.1|//defs [Crassostrea gigas]
Unigene0017047	1910	1811.11	758.643	-1.25538	0.00378946	Down	7.92735e-05	NA	NA	NA	NA	gi|405961917|gb|EKC27650.1|//EF-hand domain-containing family member B [Crassostrea gigas]
Unigene0011286	1173	559.213	234.009	-1.25683	1.73771e-05	Down	7.90018e-08	NA	NA	NA	NA	gi|405971923|gb|EKC36725.1|//Uncharacterized protein C7orf31 [Crassostrea gigas]
Unigene0015363	2580	753.626	307.161	-1.29485	3.02065e-09	Down	5.9541e-12	GO:0016020//membrane	GO:0097159//organic cyclic compound binding;GO:1901363//heterocyclic compound binding;GO:0008453//alanine-glyoxylate transaminase activity;GO:0047304//2-aminoethylphosphonate-pyruvate transaminase activity;GO:0004760//serine-pyruvate transaminase activity;GO:0043168//anion binding;GO:0004672//protein kinase activity;GO:0008483//transaminase activity;GO:0036094//small molecule binding	GO:0019634//organic phosphonate metabolic process;GO:0019700//organic phosphonate catabolic process;GO:0006796//phosphate-containing compound metabolic process	K00830//alanine-glyoxylate transaminase / serine-glyoxylate transaminase / serine-pyruvate transaminase [EC:2.6.1.44 2.6.1.45 2.6.1.51]	gi|405971984|gb|EKC36783.1|//2-aminoethylphosphonate--pyruvate transaminase [Crassostrea gigas]
Unigene0004744	775	121.588	281.361	1.21043	0.0013478	Up	1.83398e-05	NA	NA	NA	K04397//caspase 7 [EC:3.4.22.60]	gi|762161617|ref|XP_011419040.1|//PREDICTED: caspase-7-like [Crassostrea gigas]
Unigene0014252	3638	8962.89	3023.96	-1.56753	0.00443712	Down	9.80414e-05	GO:0016021//integral component of membrane	GO:0050661//NADP binding;GO:0000166//nucleotide binding;GO:0008746//NAD(P)+ transhydrogenase activity;GO:0008750//NAD(P)+ transhydrogenase (AB-specific) activity	GO:0055114//oxidation-reduction process;GO:0015992//proton transport	K00323//NAD(P) transhydrogenase [EC:1.6.1.2]	gi|762131751|ref|XP_011449049.1|//PREDICTED: NAD(P) transhydrogenase, mitochondrial-like [Crassostrea gigas]
Unigene0018270	1618	66.579	19.0395	-1.80608	0.00324276	Down	6.16511e-05	NA	NA	NA	K19511//peroxidase [EC:1.11.1.7]	gi|762143589|ref|XP_011455047.1|//PREDICTED: eosinophil peroxidase-like [Crassostrea gigas]
Unigene0012407	458	92.0186	23.2909	-1.98216	0.00189093	Down	2.90996e-05	NA	NA	NA	NA	NA
Unigene0026254	704	1829.04	720.962	-1.34309	0.00431121	Down	9.38518e-05	NA	NA	NA	NA	gi|762135841|ref|XP_011451175.1|//PREDICTED: uncharacterized protein LOC105344947 isoform X2 [Crassostrea gigas]
Unigene0024251	852	5.31878	17.7687	1.74017	0.0359764	Up	0.00186093	NA	NA	NA	K12354//ectonucleotide pyrophosphatase/phosphodiesterase family member 7 [EC:3.1.4.12]	gi|662225180|ref|XP_008486975.1|//PREDICTED: RNA-directed DNA polymerase from mobile element jockey-like, partial [Diaphorina citri]
Unigene0017027	1916	462.226	227.998	-1.01957	0.0150549	Down	0.00051118	NA	NA	NA	NA	gi|762151921|ref|XP_011413956.1|//PREDICTED: uncharacterized protein LOC105318489 [Crassostrea gigas]
Unigene0023198	943	55.2457	129.233	1.22604	0.0181687	Up	0.000689956	NA	NA	NA	NA	NA
Unigene0000284	854	5.54908	30.8909	2.47686	0.00559812	Up	0.000134907	NA	NA	NA	K11431//histone-lysine N-methyltransferase SETD7 [EC:2.1.1.43];K19941//synapsin;K05641//ATP-binding cassette, subfamily A (ABC1), member 1	gi|999968769|gb|KXJ07943.1|//Transposon TX1 uncharacterized 149 kDa protein [Exaiptasia pallida]
Unigene0006267	1145	100.815	255.867	1.34368	0.00486942	Up	0.00011069	NA	NA	NA	NA	gi|762163822|ref|XP_011420207.1|//PREDICTED: uncharacterized protein LOC105322991 [Crassostrea gigas]
Unigene0018161	1632	66.6598	206.411	1.63063	0.0161421	Up	0.000574734	NA	NA	NA	K18808//toll-like receptor 13	gi|762129597|ref|XP_011447926.1|//PREDICTED: toll-like receptor 2 [Crassostrea gigas]
Unigene0010471	496	49.8569	164.999	1.7266	0.02812	Up	0.00127024	NA	NA	NA	NA	gi|762096991|ref|XP_011431050.1|//PREDICTED: uncharacterized protein LOC105330830 [Crassostrea gigas]
Unigene0010272	852	43.2744	167.756	1.95478	0.00284889	Up	5.08116e-05	NA	NA	NA	K13297//receptor-type tyrosine-protein phosphatase T [EC:3.1.3.48]	gi|405972446|gb|EKC37213.1|//Multiple epidermal growth factor-like domains 10 [Crassostrea gigas]
Unigene0033103	352	167.715	80.0823	-1.06646	0.0245042	Down	0.00104704	NA	NA	NA	NA	NA
Unigene0028345	572	21.0002	61.7119	1.55514	0.0175778	Up	0.000652212	NA	NA	NA	NA	NA
Unigene0016909	1951	1279.21	625.924	-1.03119	0.00149165	Down	2.09611e-05	NA	NA	NA	NA	gi|762118540|ref|XP_011442159.1|//PREDICTED: UPF0704 protein C6orf165 homolog [Crassostrea gigas]
Unigene0019850	1332	893.814	1808.32	1.01661	6.06277e-05	Up	3.43096e-07	NA	NA	NA	NA	gi|762159935|ref|XP_011418170.1|//PREDICTED: uncharacterized protein LOC105321549 [Crassostrea gigas]
Unigene0020060	1294	14.9849	43.272	1.52993	0.0446958	Up	0.00253731	NA	NA	NA	NA	NA
Unigene0024054	869	27.3106	6.133	-2.1548	0.00251952	Down	4.2534e-05	NA	NA	NA	K13861//solute carrier family 4 (sodium bicarbonate transporter), member 10;K13858//solute carrier family 4 (sodium bicarbonate cotransporter), member 7	gi|405973547|gb|EKC38253.1|//Sodium-driven chloride bicarbonate exchanger [Crassostrea gigas]
Unigene0020238	1277	18.231	114.722	2.65368	9.19784e-06	Up	3.71376e-08	NA	NA	NA	K11997//tripartite motif-containing protein 2/3;K12035//tripartite motif-containing protein 71 [EC:2.3.2.27]	gi|762161163|ref|XP_011418798.1|//PREDICTED: uncharacterized protein LOC105321995 [Crassostrea gigas]
Unigene0006762	1227	308.947	145.417	-1.08716	0.00970117	Down	0.000275423	NA	NA	NA	K12478//early endosome antigen 1	gi|762096762|ref|XP_011430927.1|//PREDICTED: coiled-coil domain-containing protein 180-like [Crassostrea gigas]
Unigene0023069	959	127.969	31.3711	-2.02829	4.49196e-05	Down	2.38493e-07	NA	NA	NA	NA	gi|405957038|gb|EKC23276.1|//Uncharacterized protein C19orf45 [Crassostrea gigas]
Unigene0001361	525	31.5004	126.021	2.00023	0.000194453	Up	1.4899e-06	NA	NA	NA	NA	gi|762078825|ref|XP_011456017.1|//PREDICTED: uncharacterized protein LOC105348342 [Crassostrea gigas]
Unigene0022265	1040	89.7345	191.892	1.09656	0.0155833	Up	0.00054209	NA	NA	NA	NA	gi|762134618|ref|XP_011450541.1|//PREDICTED: uncharacterized protein LOC105344452 [Crassostrea gigas]
Unigene0016710	2010	246.224	64.5436	-1.93162	0.0170367	Down	0.000623667	NA	NA	NA	K16533//centrosomal protein CEP290	gi|762161017|ref|XP_011418728.1|//PREDICTED: centrosomal protein of 290 kDa-like isoform X1 [Crassostrea gigas]
Unigene0032093	539	22.9762	78.9295	1.78043	0.00242781	Up	3.98631e-05	NA	NA	NA	NA	gi|762142006|ref|XP_011454209.1|//PREDICTED: uncharacterized protein LOC105347035 [Crassostrea gigas]
Unigene0015225	2674	329.616	154.564	-1.09258	0.0318209	Down	0.00154481	GO:0043231//intracellular membrane-bounded organelle	NA	GO:0010927//cellular component assembly involved in morphogenesis;GO:0048858//cell projection morphogenesis;GO:0001822//kidney development;GO:0009966//regulation of signal transduction	K19676//intraflagellar transport protein 172	gi|871260706|ref|XP_012943117.1|//PREDICTED: intraflagellar transport protein 172 homolog isoform X1 [Aplysia californica]
Unigene0009874	2448	121.916	264.266	1.1161	0.0017044	Up	2.50356e-05	NA	NA	NA	K12384//lysosome membrane protein 2	gi|762072186|ref|XP_011428974.1|//PREDICTED: lysosome membrane protein 2-like [Crassostrea gigas]
Unigene0013985	4144	1532.93	620.941	-1.30376	0.0042735	Down	9.22523e-05	NA	NA	NA	K06756//neuronal cell adhesion molecule	gi|405960605|gb|EKC26516.1|//Uncharacterized protein C20orf26 [Crassostrea gigas]
Unigene0021523	1118	92.5798	190.545	1.04136	0.0079074	Up	0.000205656	NA	NA	NA	NA	NA
Unigene0004194	3214	397.053	156.673	-1.34157	0.0119677	Down	0.000368485	GO:0030286//dynein complex	GO:0005524//ATP binding;GO:0003774//motor activity;GO:0003777//microtubule motor activity;GO:0032550//purine ribonucleoside binding;GO:0016887//ATPase activity	GO:0007018//microtubule-based movement;GO:0048870//cell motility;GO:0009154//purine ribonucleotide catabolic process	K10408//dynein heavy chain, axonemal	gi|676425951|ref|XP_009044468.1|//hypothetical protein LOTGIDRAFT_184938 [Lottia gigantea]
Unigene0018229	1620	45.7689	184.859	2.01399	1.14459e-08	Up	2.7656e-11	NA	NA	NA	K20111//oviductin [EC:3.4.21.120];K09614//corin [EC:3.4.21.-];K09636//transmembrane protease serine 5 [EC:3.4.21.-]	gi|762155040|ref|XP_011415610.1|//PREDICTED: atrial natriuretic peptide-converting enzyme-like isoform X2 [Crassostrea gigas]
Unigene0001858	297	10.0582	54.3216	2.43315	0.0045862	Up	0.000102065	NA	NA	NA	NA	gi|762166786|ref|XP_011421707.1|//PREDICTED: membrane protein FAM174-like [Crassostrea gigas]
Unigene0004455	579	36.132	162.124	2.16575	0.000524496	Up	5.40072e-06	NA	NA	NA	K01315//plasminogen [EC:3.4.21.7]	gi|762091621|ref|XP_011428213.1|//PREDICTED: plasminogen-like [Crassostrea gigas]
Unigene0012953	263	163.251	805.277	2.30239	8.94552e-10	Up	1.67796e-12	NA	NA	NA	NA	gi|762086876|ref|XP_011425721.1|//PREDICTED: mulatexin-like [Crassostrea gigas]
Unigene0021123	1144	672.526	249.42	-1.43102	0.000401793	Down	3.82639e-06	GO:0016021//integral component of membrane	NA	NA	NA	gi|762143302|ref|XP_011454899.1|//PREDICTED: uncharacterized protein LOC105347486 [Crassostrea gigas]
Unigene0020469	1250	611.423	1580.42	1.37007	3.11585e-09	Up	6.24244e-12	NA	NA	NA	NA	gi|405960845|gb|EKC26719.1|//Ribonuclease H2 subunit B [Crassostrea gigas]
Unigene0023805	891	191607	78185.9	-1.29317	0.00529593	Down	0.000124931	NA	NA	NA	K06237//collagen, type IV, alpha	gi|762109952|ref|XP_011437644.1|//PREDICTED: collagen alpha-1(X) chain-like [Crassostrea gigas]
Unigene0019953	1310	281.763	108.829	-1.37241	0.0203749	Down	0.000811006	NA	NA	NA	NA	gi|762108707|ref|XP_011436984.1|//PREDICTED: uncharacterized protein LOC105335020 [Crassostrea gigas]
Unigene0002829	555	44.1025	107.083	1.2798	0.0268097	Up	0.00118902	NA	NA	NA	NA	NA
Unigene0010828	293	81.9361	265.649	1.69695	6.52614e-06	Up	2.55203e-08	NA	NA	NA	NA	gi|405952505|gb|EKC20306.1|//Ninjurin-1 [Crassostrea gigas]
Unigene0008603	760	179.12	79.04	-1.18027	0.0403729	Down	0.00218333	NA	NA	NA	NA	gi|762167855|ref|XP_011422270.1|//PREDICTED: EF-hand calcium-binding domain-containing protein 6-like [Crassostrea gigas]
Unigene0018035	1655	15.5162	53.5071	1.78596	0.0396063	Up	0.00212046	NA	NA	NA	K05312//nicotinic acetylcholine receptor, invertebrate;K04808//nicotinic acetylcholine receptor alpha-6;K04803//nicotinic acetylcholine receptor alpha-1	gi|762099966|ref|XP_011432425.1|//PREDICTED: neuronal acetylcholine receptor subunit alpha-2-like [Crassostrea gigas]
Unigene0005014	4794	440.831	898.246	1.02688	0.00112252	Up	1.42913e-05	NA	NA	NA	NA	gi|762119279|ref|XP_011442543.1|//PREDICTED: protein FAM65B-like isoform X1 [Crassostrea gigas]
Unigene0019337	1415	269.63	600.645	1.15553	0.0324038	Up	0.00159578	NA	NA	NA	NA	gi|762115123|ref|XP_011440365.1|//PREDICTED: uncharacterized protein LOC105337367 [Crassostrea gigas]
Unigene0015113	2755	640.351	1748.34	1.44905	1.43166e-05	Up	6.17123e-08	NA	NA	NA	K02175//putative enzyme (brainiac)	gi|405972732|gb|EKC37482.1|//Beta-1,3-galactosyltransferase 1 [Crassostrea gigas]
Unigene0016001	2274	113.115	46.9892	-1.26739	0.0279755	Down	0.00126119	NA	NA	GO:0003341//cilium movement	K17570//hydrocephalus-inducing protein	gi|762100034|ref|XP_011432460.1|//PREDICTED: hydrocephalus-inducing protein-like isoform X2 [Crassostrea gigas]
Unigene0027044	652	171.004	83.5863	-1.03269	0.0383894	Down	0.0020248	NA	NA	NA	NA	gi|762115647|ref|XP_011440633.1|//PREDICTED: uncharacterized protein LOC105337560 isoform X6 [Crassostrea gigas]
Unigene0012149	215	21.717	51.0483	1.23304	0.0351097	Up	0.00179676	NA	NA	NA	NA	gi|405957420|gb|EKC23631.1|//Alstrom syndrome protein 1 [Crassostrea gigas]
Unigene0005338	343	4.82311	26.3027	2.44717	0.0069215	Up	0.000173193	NA	NA	NA	NA	NA
Unigene0015869	2335	669.924	259.785	-1.36668	0.00079877	Down	9.26913e-06	NA	NA	NA	K08834//myosin III [EC:2.7.11.1]	gi|762086836|ref|XP_011425699.1|//PREDICTED: myosin-IIIb-like isoform X3 [Crassostrea gigas]
Unigene0022609	1007	851.554	1971.06	1.2108	0.000991957	Up	1.20338e-05	NA	NA	NA	NA	gi|762134939|ref|XP_011450709.1|//PREDICTED: uncharacterized protein LOC105344600 [Crassostrea gigas]
Unigene0001198	4552	301.502	145.509	-1.05106	0.0241589	Down	0.00102461	NA	NA	NA	K17341//hemicentin	gi|405967455|gb|EKC32610.1|//Titin [Crassostrea gigas]
Unigene0026518	684	1204.68	583.23	-1.04651	0.0411778	Down	0.00225303	NA	NA	NA	K00558//DNA (cytosine-5)-methyltransferase 1 [EC:2.1.1.37];K11837//ubiquitin carboxyl-terminal hydrolase 6/32 [EC:3.4.19.12]	gi|762091036|ref|XP_011427904.1|//PREDICTED: coiled-coil-helix-coiled-coil-helix domain-containing protein 10, mitochondrial-like [Crassostrea gigas]
Unigene0007574	690	3.321	19.6529	2.56505	0.00207888	Up	3.29803e-05	NA	NA	NA	K18772//C->U-editing enzyme APOBEC2 [EC:3.5.4.-]	gi|762160202|ref|XP_011418311.1|//PREDICTED: uncharacterized protein LOC105321640 [Crassostrea gigas]
Unigene0028226	579	167.378	551.918	1.72135	4.93165e-05	Up	2.66339e-07	NA	NA	NA	NA	gi|762141374|ref|XP_011453871.1|//PREDICTED: uncharacterized protein LOC105346843 [Crassostrea gigas]
Unigene0027490	623	25.8951	6.53988	-1.98534	0.00780712	Down	0.000202537	NA	NA	NA	K14216//2'-5'-oligoadenylate synthetase [EC:2.7.7.84]	gi|762116763|ref|XP_011441227.1|//PREDICTED: 2'-5'-oligoadenylate synthase 1A-like [Crassostrea gigas]
Unigene0028674	553	12.5772	48.0428	1.93351	0.00405905	Up	8.65906e-05	NA	NA	NA	NA	gi|762142105|ref|XP_011454264.1|//PREDICTED: uncharacterized protein LOC105347070 [Crassostrea gigas]
Unigene0009132	1948	229.51	94.6106	-1.27848	0.00130565	Down	1.75586e-05	NA	NA	NA	K10408//dynein heavy chain, axonemal	gi|405953052|gb|EKC20784.1|//Dynein heavy chain 1, axonemal [Crassostrea gigas]
Unigene0006929	1120	304.625	139.963	-1.12199	0.00214999	Down	3.45868e-05	NA	NA	NA	K12641//lamin A/C	gi|762117707|ref|XP_011441715.1|//PREDICTED: uncharacterized protein LOC105338349 isoform X5 [Crassostrea gigas]
Unigene0011522	392	9.62083	31.2816	1.70108	0.0171403	Up	0.000633212	NA	NA	NA	NA	NA
Unigene0016492	2078	42.7504	580.09	3.76227	5.83751e-11	Up	8.78322e-14	NA	GO:0016491//oxidoreductase activity	NA	K17854//cytochrome P450 family 2 subfamily K;K07422//cytochrome P450 family 2 subfamily U polypeptide 1;K07418//cytochrome P450 family 2 subfamily J [EC:1.14.14.1]	gi|405978612|gb|EKC42990.1|//Cytochrome P450 2U1 [Crassostrea gigas]
Unigene0017771	1725	633.148	1289.62	1.02633	0.000131088	Up	8.71031e-07	NA	GO:0004112//cyclic-nucleotide phosphodiesterase activity	GO:0051260//protein homooligomerization;GO:0051259//protein oligomerization	K15074//BTB/POZ domain-containing adapter for CUL3-mediated RhoA degradation protein	gi|676454873|ref|XP_009053822.1|//hypothetical protein LOTGIDRAFT_117262 [Lottia gigantea]
Unigene0025247	774	19.0067	4.17097	-2.18806	0.0202745	Down	0.00080522	NA	NA	NA	NA	NA
Unigene0032855	1456	111.42	45.9092	-1.27915	0.0246182	Down	0.00105739	NA	NA	NA	NA	gi|762156337|ref|XP_011416295.1|//PREDICTED: uncharacterized protein LOC105320174 isoform X3 [Crassostrea gigas]
Unigene0009107	1596	95.4945	226.554	1.24636	0.00536577	Up	0.000127431	NA	NA	NA	NA	gi|762120897|ref|XP_011443369.1|//PREDICTED: uncharacterized protein LOC105339494 isoform X3 [Crassostrea gigas]
Unigene0010127	1035	186.904	78.0212	-1.26036	0.0489481	Down	0.00289845	NA	NA	NA	NA	gi|762078929|ref|XP_011456560.1|//PREDICTED: WAS/WASL-interacting protein family member 3-like [Crassostrea gigas]
Unigene0014375	3446	233.869	528.112	1.17515	2.12699e-06	Up	7.23558e-09	NA	NA	NA	K14388//solute carrier family 5 (sodium-coupled monocarboxylate transporter), member 8/12	gi|762149313|ref|XP_011412594.1|//PREDICTED: uncharacterized protein LOC105317600 isoform X2 [Crassostrea gigas]
Unigene0020323	1267	472.384	235.485	-1.00433	0.0129651	Down	0.000418375	NA	NA	NA	NA	gi|762099471|ref|XP_011432162.1|//PREDICTED: uncharacterized protein LOC105331597 isoform X2 [Crassostrea gigas]
Unigene0025178	779	704.407	341.422	-1.04485	0.00938125	Down	0.000262761	NA	GO:0005488//binding	NA	NA	gi|405953440|gb|EKC21101.1|//Zinc finger protein Noc [Crassostrea gigas]
Unigene0014896	2905	511.484	147.967	-1.78941	0.000373964	Down	3.4241e-06	NA	NA	NA	NA	gi|762161457|ref|XP_011418954.1|//PREDICTED: uncharacterized protein LOC105322112 [Crassostrea gigas]
Unigene0028903	539	146.728	24.2407	-2.59764	0.000592424	Down	6.3661e-06	NA	NA	NA	NA	gi|405966921|gb|EKC32148.1|//hypothetical protein CGI_10022179 [Crassostrea gigas]
Unigene0026227	706	235.204	100.886	-1.22118	0.00806629	Down	0.000210543	NA	NA	NA	NA	gi|762073911|ref|XP_011436266.1|//PREDICTED: uncharacterized protein C7orf72-like isoform X1 [Crassostrea gigas]
Unigene0005347	4975	218.706	521.031	1.25238	0.00834328	Up	0.000220426	NA	NA	NA	K20051//low-density lipoprotein receptor-related protein 4	gi|762135313|ref|XP_011450904.1|//PREDICTED: low-density lipoprotein receptor-related protein 4-like [Crassostrea gigas]
Unigene0003919	770	466.375	226.898	-1.03945	0.00693229	Down	0.000174112	NA	NA	NA	NA	gi|762083824|ref|XP_011424375.1|//PREDICTED: uncharacterized protein LOC105326200 isoform X2 [Crassostrea gigas]
Unigene0000275	3261	1509.07	664.868	-1.18252	0.00501005	Down	0.000115001	NA	NA	NA	K16461//centrosomal protein CEP135	gi|762112150|ref|XP_011438805.1|//PREDICTED: centrosomal protein of 135 kDa-like isoform X1 [Crassostrea gigas]
Unigene0013031	419	6.44761	25.1799	1.96544	0.0350461	Up	0.00178999	NA	NA	NA	K06776//receptor-type tyrosine-protein phosphatase kappa [EC:3.1.3.48];K13297//receptor-type tyrosine-protein phosphatase T [EC:3.1.3.48]	gi|762151729|ref|XP_011413855.1|//PREDICTED: receptor-type tyrosine-protein phosphatase kappa-like [Crassostrea gigas]
Unigene0023869	884	13.447	40.5478	1.59234	0.0293763	Up	0.00136543	NA	NA	NA	NA	gi|762147130|ref|XP_011456867.1|//PREDICTED: uncharacterized protein LOC105348948 isoform X1 [Crassostrea gigas]
Unigene0032957	1320	469.898	189.329	-1.31145	2.02985e-06	Down	6.84059e-09	NA	NA	NA	K04808//nicotinic acetylcholine receptor alpha-6;K05312//nicotinic acetylcholine receptor, invertebrate;K04814//nicotinic acetylcholine receptor beta-3	gi|762169262|ref|XP_011423031.1|//PREDICTED: neuronal acetylcholine receptor subunit beta-3-like isoform X1 [Crassostrea gigas]
Unigene0008345	260	79.4843	214.264	1.43065	0.00732951	Up	0.00018805	NA	NA	NA	NA	NA
Unigene0020708	1212	6.56538	26.404	2.00781	0.0302824	Up	0.0014422	GO:0016021//integral component of membrane	NA	NA	NA	gi|762168946|ref|XP_011422862.1|//PREDICTED: uncharacterized protein LOC105325141 [Crassostrea gigas]
Unigene0016410	2115	334.805	67.8547	-2.3028	8.76735e-09	Down	2.03477e-11	GO:0016020//membrane	NA	NA	K19876//metalloreductase STEAP4 [EC:1.16.1.-];K10142//metalloreductase STEAP3 [EC:1.16.1.-];K14738//metalloreductase STEAP2 [EC:1.16.1.-]	gi|405958108|gb|EKC24268.1|//Metalloreductase STEAP2 [Crassostrea gigas]
Unigene0011426	794	35.6469	73.1706	1.03749	0.0420911	Up	0.00231371	NA	NA	NA	NA	NA
Unigene0005169	2156	153.642	74.0961	-1.0521	0.0268463	Down	0.0011915	NA	GO:0003824//catalytic activity;GO:0016874//ligase activity	NA	K01969//3-methylcrotonyl-CoA carboxylase beta subunit [EC:6.4.1.4]	gi|762089601|ref|XP_011427157.1|//PREDICTED: methylcrotonoyl-CoA carboxylase beta chain, mitochondrial-like [Crassostrea gigas]
Unigene0001707	828	37.0155	87.1965	1.23614	0.0092473	Up	0.000256363	NA	NA	NA	NA	gi|762112063|ref|XP_011438759.1|//PREDICTED: uncharacterized protein LOC105336230 [Crassostrea gigas]
Unigene0009908	1142	37.0114	197.629	2.41675	0.00827233	Up	0.000217499	NA	NA	NA	NA	NA
Unigene0016455	2101	46.1523	93.1833	1.01367	0.0254836	Up	0.00110915	NA	NA	NA	K17767//AH receptor-interacting protein	gi|762076851|ref|XP_011447635.1|//PREDICTED: uncharacterized protein LOC105342394 [Crassostrea gigas]
Unigene0023349	932	37.1009	5.23053	-2.82642	0.00116424	Down	1.49907e-05	NA	NA	NA	NA	gi|762105069|ref|XP_011435088.1|//PREDICTED: uncharacterized protein LOC105333697 [Crassostrea gigas]
Unigene0020009	1307	54.3897	452.936	3.0579	8.02322e-10	Up	1.45394e-12	NA	NA	NA	NA	gi|762104446|ref|XP_011434760.1|//PREDICTED: FAD-linked oxidoreductase DDB_G0289697-like [Crassostrea gigas]
Unigene0010328	463	503.322	18.3309	-4.77913	1.97095e-18	Down	1.25323e-21	NA	NA	NA	NA	gi|762161081|ref|XP_011418757.1|//PREDICTED: uncharacterized protein LOC105321961 isoform X4 [Crassostrea gigas]
Unigene0027805	598	306.864	30.0203	-3.35359	1.27756e-11	Down	1.78714e-14	GO:0016021//integral component of membrane	NA	NA	NA	gi|762075639|ref|XP_011443304.1|//PREDICTED: uncharacterized protein LOC105339439 isoform X2 [Crassostrea gigas]
Unigene0018447	1579	385.344	968.296	1.3293	0.0108881	Up	0.000321797	NA	NA	NA	K14616//cubilin;K20050//low-density lipoprotein receptor-related protein 3/10/12	gi|762140509|ref|XP_011453425.1|//PREDICTED: transmembrane protease serine 7-like [Crassostrea gigas]
Unigene0010254	1466	2598.42	1017.06	-1.35322	0.00182323	Down	2.76493e-05	NA	NA	NA	K15042//importin subunit alpha-1	gi|676436025|ref|XP_009047747.1|//hypothetical protein LOTGIDRAFT_172613 [Lottia gigantea]
Unigene0030564	317	44.0202	11.6933	-1.91248	0.00774811	Down	0.000200514	NA	NA	NA	NA	NA
Unigene0010262	237	61.4968	123.211	1.00255	0.0288205	Up	0.00131609	NA	NA	NA	NA	NA
Unigene0022762	987	40.0646	9.59324	-2.06224	0.0324397	Down	0.00159857	NA	NA	NA	K00025//malate dehydrogenase [EC:1.1.1.37];K14763//H/ACA ribonucleoprotein complex non-core subunit NAF1;K04612//calcium-sensing receptor;K08029//homeobox protein Nkx-2.2;K17601//WD repeat-containing protein 81	gi|999967746|gb|KXJ06920.1|//Retrovirus-related Pol polyprotein from transposon 412 [Exaiptasia pallida]
Unigene0028024	591	9.81647	71.1532	2.85765	1.29382e-07	Up	3.53751e-10	NA	NA	NA	NA	NA
Unigene0010072	830	149.02	66.5968	-1.16198	0.0253613	Down	0.00109979	NA	NA	NA	NA	gi|762132511|ref|XP_011449442.1|//PREDICTED: uncharacterized protein LOC105343690 isoform X2 [Crassostrea gigas]
Unigene0016019	2267	4920.78	2210.09	-1.15478	0.00390443	Down	8.24232e-05	NA	GO:0046872//metal ion binding;GO:0005509//calcium ion binding	NA	NA	gi|405964721|gb|EKC30173.1|//EF-hand domain-containing protein 1 [Crassostrea gigas]
Unigene0019943	1318	114.658	557.707	2.28217	0.014133	Up	0.000472686	NA	NA	NA	K19533//synaptonemal complex protein 1;K03986//complement C1q subcomponent subunit A;K16353//protein sidekick	gi|762089517|ref|XP_011427112.1|//PREDICTED: uncharacterized protein LOC105328060 [Crassostrea gigas]
Unigene0004954	301	2.49171	90.9966	5.1906	2.71655e-18	Up	1.90005e-21	NA	NA	NA	K10405//kinesin family member C1	gi|762101969|ref|XP_011433474.1|//PREDICTED: uncharacterized protein LOC105332542 [Crassostrea gigas]
Unigene0017091	1897	15380.1	6443.56	-1.25514	0.00814688	Down	0.000213424	GO:0045261//proton-transporting ATP synthase complex, catalytic core F(1)	GO:0005524//ATP binding;GO:0046933//proton-transporting ATP synthase activity, rotational mechanism	GO:0015986//ATP synthesis coupled proton transport;GO:0015991//ATP hydrolysis coupled proton transport	K02133//F-type H+-transporting ATPase subunit beta [EC:3.6.3.14]	gi|86156234|gb|ABC86835.1|//ATP synthase beta subunit [Pinctada fucata]
Unigene0002274	640	78.7286	199.129	1.33874	0.034968	Up	0.00178208	NA	NA	NA	NA	NA
Unigene0029520	501	338.546	711.258	1.07102	0.00122132	Up	1.5881e-05	NA	NA	NA	NA	gi|405967899|gb|EKC33018.1|//hypothetical protein CGI_10013646 [Crassostrea gigas]
Unigene0006184	1581	18990.4	6830.83	-1.47514	0.00176551	Down	2.63811e-05	NA	GO:0000166//nucleotide binding;GO:0016301//kinase activity	NA	K00933//creatine kinase [EC:2.7.3.2]	gi|44885729|dbj|BAD11950.1|//arginine kinase [Crassostrea gigas]
Unigene0014082	3923	79.23	172.347	1.12119	0.0104011	Up	0.000302238	NA	NA	NA	K19867//LIM domain-binding protein 3;K06086//sorbin and SH3 domain containing 1	gi|405965400|gb|EKC30777.1|//Synaptopodin-2 [Crassostrea gigas]
Unigene0008265	321	32.0946	8.25491	-1.959	0.00429937	Down	9.29475e-05	NA	NA	NA	NA	NA
Unigene0005301	1146	669.64	330.398	-1.01918	0.000854565	Down	1.01883e-05	NA	NA	NA	NA	gi|762071898|ref|XP_011427457.1|//PREDICTED: protein MAATS1-like isoform X1 [Crassostrea gigas]
Unigene0008463	2929	297.74	873.521	1.55279	0.00141342	Up	1.95023e-05	NA	NA	NA	K17341//hemicentin	gi|762086116|ref|XP_011425324.1|//PREDICTED: von Willebrand factor A domain-containing protein 7-like isoform X2 [Crassostrea gigas]
Unigene0018687	1531	233.809	106.806	-1.13034	0.0495989	Down	0.00295506	NA	NA	NA	K20282//GRIP and coiled-coil domain-containing protein 2;K16808//nuclear mitotic apparatus protein 1;K20283//golgin subfamily A member 4;K20478//golgin subfamily B member 1	gi|762102468|ref|XP_011433727.1|//PREDICTED: glutamine-rich protein 2-like isoform X5 [Crassostrea gigas]
Unigene0022724	989	5.85118	285.429	5.60826	7.1401e-38	Up	1.36201e-41	NA	GO:0070011//peptidase activity, acting on L-amino acid peptides	NA	K01283//peptidyl-dipeptidase A [EC:3.4.15.1]	gi|919051807|ref|XP_013407921.1|//PREDICTED: angiotensin-converting enzyme-like [Lingula anatina]
Unigene0025217	773	59.9423	279.426	2.22082	4.98336e-07	Up	1.47343e-09	NA	NA	NA	K03927//carboxylesterase 2 [EC:3.1.1.1 3.1.1.84 3.1.1.56];K01050//cholinesterase [EC:3.1.1.8]	gi|762077232|ref|XP_011449686.1|//PREDICTED: carboxylesterase 1C-like [Crassostrea gigas]
Unigene0029126	527	59.6101	22.5335	-1.40349	0.0310665	Down	0.00149595	NA	NA	NA	NA	NA
Unigene0013489	11258	610.802	1492.17	1.28864	7.69363e-05	Up	4.59945e-07	NA	NA	NA	K13912//deleted in malignant brain tumors 1 protein	gi|762155471|ref|XP_011415839.1|//PREDICTED: multiple epidermal growth factor-like domains protein 6 [Crassostrea gigas]
Unigene0016603	2035	128.148	48.0924	-1.41393	0.00484609	Down	0.000110005	GO:0016020//membrane	GO:0015293//symporter activity	GO:0006810//transport	K05038//solute carrier family 6 (neurotransmitter transporter, amino acid) member 5/7/9/14	gi|762166945|ref|XP_011421786.1|//PREDICTED: sodium- and chloride-dependent glycine transporter 2-like [Crassostrea gigas]
Unigene0007160	2524	440.536	181.784	-1.27704	0.00373453	Down	7.62792e-05	NA	NA	NA	NA	gi|762167491|ref|XP_011422077.1|//PREDICTED: amyloid protein-binding protein 2-like [Crassostrea gigas]
Unigene0018955	1480	24.3468	247.48	3.34551	1.68356e-23	Up	8.0287e-27	NA	NA	NA	NA	NA
Unigene0027814	597	3.98928	80.3561	4.33221	1.26169e-13	Up	1.54164e-16	NA	NA	NA	NA	gi|919056689|ref|XP_013410155.1|//PREDICTED: uncharacterized protein LOC106173543 [Lingula anatina]
Unigene0015160	2713	37.1502	157.809	2.08674	9.32141e-05	Up	5.78184e-07	NA	NA	NA	K06238//collagen, type VI, alpha	gi|762147444|ref|XP_011457035.1|//PREDICTED: collagen alpha-6(VI) chain-like [Crassostrea gigas]
Unigene0014834	2959	43.0453	109.412	1.34584	0.0470198	Up	0.00271469	NA	NA	NA	K05109//Eph receptor A8 [EC:2.7.10.1];K00025//malate dehydrogenase [EC:1.1.1.37];K04612//calcium-sensing receptor;K14401//cleavage and polyadenylation specificity factor subunit 1;K16803//cytoskeleton-associated protein 5	gi|999970383|gb|KXJ09557.1|//Retrovirus-related Pol polyprotein from transposon opus [Exaiptasia pallida]
Unigene0017545	1775	231.056	472.912	1.03333	0.00369472	Up	7.51772e-05	NA	NA	NA	NA	gi|762154775|ref|XP_011415468.1|//PREDICTED: uncharacterized protein LOC105319571 [Crassostrea gigas]
Unigene0006649	1662	1471.85	466.065	-1.65903	8.10996e-19	Down	4.89888e-22	NA	NA	NA	K16600//tubulin polyglutamylase TTLL2 [EC:6.-.-.-]	gi|762076008|ref|XP_011445280.1|//PREDICTED: protein unc-93 homolog A-like isoform X1 [Crassostrea gigas]
Unigene0024753	814	108.805	283.894	1.38361	0.000853743	Up	1.01513e-05	NA	NA	NA	NA	NA
Unigene0027423	627	42.1144	178.789	2.08587	6.37208e-06	Up	2.47153e-08	NA	NA	NA	K05635//laminin, gamma 1	gi|762095807|ref|XP_011430416.1|//PREDICTED: laminin subunit gamma-1-like [Crassostrea gigas]
Unigene0015773	2377	491.166	230.774	-1.08973	0.0185956	Down	0.000713578	NA	NA	NA	K16483//centrosomal protein POC5	gi|762155649|ref|XP_011415931.1|//PREDICTED: centrosomal protein POC5-like [Crassostrea gigas]
Unigene0014675	3100	165.422	79.6332	-1.0547	0.0166403	Down	0.000602042	NA	NA	NA	K03362//F-box and WD-40 domain protein 1/11;K14793//ribosomal RNA-processing protein 9;K13137//serine-threonine kinase receptor-associated protein;K18643//katanin p80 WD40 repeat-containing subunit B1	gi|762093933|ref|XP_011429434.1|//PREDICTED: WD repeat-containing protein KIAA1875-like isoform X2 [Crassostrea gigas]
Unigene0029044	531	18.8472	49.3275	1.38804	0.0242209	Up	0.00102801	NA	NA	NA	NA	NA
Unigene0014165	3766	363.134	134.314	-1.4349	0.0302692	Down	0.00143973	NA	NA	NA	K06838//slit 1;K06850//slit 3	gi|405951662|gb|EKC19556.1|//Slit-like protein 3 protein [Crassostrea gigas]
Unigene0024741	809	34.4708	84.389	1.29168	0.0024866	Up	4.14249e-05	NA	NA	NA	NA	NA
Unigene0027609	615	29.8893	157.836	2.40072	3.95437e-05	Up	1.99894e-07	NA	NA	NA	NA	gi|405964301|gb|EKC29801.1|//hypothetical protein CGI_10011216 [Crassostrea gigas]
Unigene0032775	2076	159.349	610.634	1.93812	0.0340121	Up	0.00171607	NA	NA	NA	K16353//protein sidekick;K18744//caprin-2	gi|762112377|ref|XP_011438925.1|//PREDICTED: uncharacterized protein LOC105336352 isoform X2 [Crassostrea gigas]
Unigene0025291	766	860.715	315.003	-1.45017	0.0300395	Down	0.00142442	NA	NA	NA	K18274//uromodulin;K19899//pancreatic secretory granule membrane major glycoprotein GP2;K04593//latrophilin 2	gi|762073152|ref|XP_011432135.1|//PREDICTED: uncharacterized protein LOC105331573 [Crassostrea gigas]
Unigene0021697	1093	218.046	90.1044	-1.27496	0.0138655	Down	0.000456397	NA	NA	NA	K19760//dynein assembly factor with WDR repeat domains 1;K02988//small subunit ribosomal protein S5;K12816//pre-mRNA-processing factor 17;K14555//U3 small nucleolar RNA-associated protein 13	gi|762090655|ref|XP_011427709.1|//PREDICTED: WD repeat-containing protein 64-like isoform X5 [Crassostrea gigas]
Unigene0019550	1373	86.3116	177.419	1.03954	0.0340409	Up	0.00171969	NA	NA	NA	K18274//uromodulin	gi|762121344|ref|XP_011443598.1|//PREDICTED: von Willebrand factor D and EGF domain-containing protein-like [Crassostrea gigas]
Unigene0022266	1038	8.51716	28.1907	1.72678	0.029652	Up	0.00138615	NA	NA	NA	K11182//diamine oxidase [EC:1.4.3.22]	gi|762103222|ref|XP_011434127.1|//PREDICTED: putative amine oxidase [copper-containing] [Crassostrea gigas]
Unigene0030196	445	15.7598	85.3519	2.43717	0.000145757	Up	9.96305e-07	NA	NA	NA	NA	NA
Unigene0027307	634	293.264	146.169	-1.00456	0.032299	Down	0.00158651	NA	NA	GO:0044707//single-multicellular organism process;GO:0009967//positive regulation of signal transduction;GO:0016567//protein ubiquitination;GO:0035556//intracellular signal transduction;GO:0048856//anatomical structure development;GO:0007166//cell surface receptor signaling pathway;GO:0044767//single-organism developmental process	K03175//TNF receptor-associated factor 6 [EC:2.3.2.27]	gi|762146393|ref|XP_011456499.1|//PREDICTED: TNF receptor-associated factor 6-like isoform X1 [Crassostrea gigas]
Unigene0002078	301	23.5263	4.40081	-2.41844	0.00814688	Down	0.000213307	NA	NA	NA	NA	NA
Unigene0008419	415	331.41	119.532	-1.47122	0.00253039	Down	4.27979e-05	NA	GO:0016301//kinase activity	GO:0044237//cellular metabolic process	K00939//adenylate kinase [EC:2.7.4.3]	gi|762108447|ref|XP_011436849.1|//PREDICTED: adenylate kinase isoenzyme 5-like isoform X2 [Crassostrea gigas]
Unigene0029978	471	26.966	58.4536	1.11615	0.0398222	Up	0.00213835	NA	NA	NA	K12875//apoptotic chromatin condensation inducer in the nucleus;K16551//A-kinase anchor protein 9;K12478//early endosome antigen 1	gi|405968577|gb|EKC33637.1|//hypothetical protein CGI_10020079 [Crassostrea gigas]
Unigene0013479	16361	2120.88	5330.3	1.32955	0.00167758	Up	2.44272e-05	NA	NA	NA	K14462//apolipoprotein B	gi|762076739|ref|XP_011447122.1|//PREDICTED: uncharacterized protein LOC105342035, partial [Crassostrea gigas]
Unigene0014969	2860	24.5236	90.0055	1.87584	0.0083595	Up	0.00022112	GO:0016020//membrane	NA	GO:0006810//transport	K14388//solute carrier family 5 (sodium-coupled monocarboxylate transporter), member 8/12;K14386//solute carrier family 5 (sodium-dependent multivitamin transporter), member 6	gi|762131636|ref|XP_011448990.1|//PREDICTED: sodium-coupled monocarboxylate transporter 1-like [Crassostrea gigas]
Unigene0016060	2249	281.902	130.191	-1.11457	0.0216627	Down	0.000883616	GO:0016020//membrane	NA	GO:0016055//Wnt signaling pathway	NA	gi|762100625|ref|XP_011432770.1|//PREDICTED: protein APCDD1-like [Crassostrea gigas]
Unigene0004332	538	128.426	55.1545	-1.21938	0.00972201	Down	0.000276323	NA	NA	NA	NA	NA
Unigene0018949	1481	494.888	167.344	-1.56428	0.00171956	Down	2.54212e-05	NA	NA	NA	K17960//cytochrome P450 family 49 subfamily A	gi|762083779|ref|XP_011424352.1|//PREDICTED: probable cytochrome P450 49a1 isoform X2 [Crassostrea gigas]
Unigene0002063	1437	309.586	99.8958	-1.63185	0.0240254	Down	0.00101513	NA	NA	NA	NA	gi|762135866|ref|XP_011451188.1|//PREDICTED: glutamate-rich protein 3-like isoform X4 [Crassostrea gigas]
Unigene0024414	840	360.205	128.99	-1.48156	1.17413e-06	Down	3.79922e-09	NA	NA	NA	NA	gi|762076615|ref|XP_011446463.1|//PREDICTED: uncharacterized protein LOC105341577 [Crassostrea gigas]
Unigene0028504	560	34.6486	77.0514	1.15302	0.0196881	Up	0.000773653	NA	NA	NA	NA	gi|405952015|gb|EKC19874.1|//hypothetical protein CGI_10007373 [Crassostrea gigas]
Unigene0009455	1255	272.519	102.7	-1.40793	0.000330867	Down	2.88223e-06	NA	NA	NA	NA	gi|762091702|ref|XP_011428257.1|//PREDICTED: uncharacterized protein LOC105328914 [Crassostrea gigas]
Unigene0018976	1474	217.599	57.1115	-1.92982	0.000570872	Down	5.98931e-06	NA	NA	NA	NA	gi|762108165|ref|XP_011436705.1|//PREDICTED: uncharacterized protein LOC105334826 [Crassostrea gigas]
Unigene0025206	761	24.9483	7.58173	-1.71834	0.0302313	Down	0.00143592	NA	NA	NA	NA	gi|405952219|gb|EKC20057.1|//Uncharacterized protein CXorf22 [Crassostrea gigas]
Unigene0003381	934	28.6092	61.237	1.09793	0.034589	Up	0.00175617	NA	NA	NA	NA	NA
Unigene0010309	845	9.65756	34.812	1.84986	0.00522841	Up	0.000123084	NA	NA	NA	K04194//cholecystokinin A receptor;K04207//neuropeptide Y receptor type 5	gi|405977336|gb|EKC41793.1|//hypothetical protein CGI_10026411 [Crassostrea gigas]
Unigene0007082	1721	121.135	360.86	1.57482	0.0245264	Up	0.00104886	NA	NA	NA	K04194//cholecystokinin A receptor;K04207//neuropeptide Y receptor type 5	gi|762092603|ref|XP_011428733.1|//PREDICTED: alpha-1A adrenergic receptor-like [Crassostrea gigas]
Unigene0021198	1156	137.198	402.934	1.55428	0.00206655	Up	3.26533e-05	NA	NA	NA	NA	gi|762082404|ref|XP_011424013.1|//PREDICTED: E3 ubiquitin-protein ligase RNF213-like [Crassostrea gigas]
Unigene0017044	1912	174.238	65.6347	-1.40853	0.00712249	Down	0.000180927	NA	NA	NA	K06491//neural cell adhesion molecule	gi|762102890|ref|XP_011433951.1|//PREDICTED: neural/ectodermal development factor IMP-L2-like [Crassostrea gigas]
Unigene0010243	1937	288.404	107.795	-1.4198	0.000938301	Down	1.13059e-05	NA	NA	NA	K08181//MFS transporter, MCP family, solute carrier family 16 (monocarboxylic acid transporters), member 4;K08186//MFS transporter, MCP family, solute carrier family 16 (monocarboxylic acid transporters), member 9;K18417//ERI1 exoribonuclease 2 [EC:3.1.-.-];K11810//MFS transporter, MCP family, solute carrier family 16 (monocarboxylic acid transporters), member 12	gi|762138793|ref|XP_011452730.1|//PREDICTED: monocarboxylate transporter 5-like isoform X3 [Crassostrea gigas]
Unigene0002176	1501	194.296	77.9046	-1.31847	0.0318587	Down	0.00155058	NA	NA	NA	NA	gi|762078874|ref|XP_011456241.1|//PREDICTED: sperm-associated antigen 17-like isoform X9 [Crassostrea gigas]
Unigene0018542	1558	237.041	904.6	1.93214	0.00208953	Up	3.32156e-05	NA	NA	NA	K06238//collagen, type VI, alpha	gi|762086870|ref|XP_011425717.1|//PREDICTED: collagen alpha-1(XIV) chain-like [Crassostrea gigas]
Unigene0030021	465	96.7696	46.7698	-1.04898	0.0251872	Down	0.00109064	NA	NA	NA	NA	NA
Unigene0015857	2342	221.276	109.481	-1.01517	0.0178407	Down	0.000668729	NA	NA	NA	NA	gi|762154330|ref|XP_011415230.1|//PREDICTED: uncharacterized protein LOC105319401 isoform X3 [Crassostrea gigas]
Unigene0010860	804	71.8207	168.304	1.2286	0.033021	Up	0.00163982	NA	NA	GO:0042273//ribosomal large subunit biogenesis	K12602//WD repeat-containing protein 61;K10341//WD repeat and SOCS box-containing protein 1;K14793//ribosomal RNA-processing protein 9;K14558//periodic tryptophan protein 2	gi|762095605|ref|XP_011430308.1|//PREDICTED: WD repeat-containing protein 55-like isoform X2 [Crassostrea gigas]
Unigene0030158	448	307.93	632.912	1.0394	0.00431087	Up	9.36073e-05	GO:0044444//cytoplasmic part	GO:0016209//antioxidant activity;GO:0016668//oxidoreductase activity, acting on a sulfur group of donors, NAD(P) as acceptor	GO:0019221//cytokine-mediated signaling pathway;GO:0044710//single-organism metabolic process	K00685//arginine-tRNA-protein transferase [EC:2.3.2.8];K00771//protein xylosyltransferase [EC:2.4.2.26]	gi|762164567|ref|XP_011420601.1|//PREDICTED: thioredoxin domain-containing protein 17-like [Crassostrea gigas]
Unigene0015461	2543	209.085	39.2188	-2.41447	0.00824861	Down	0.000216351	NA	NA	NA	NA	gi|762129789|ref|XP_011448024.1|//PREDICTED: uncharacterized protein LOC105342697 isoform X2 [Crassostrea gigas]
Unigene0027505	621	76.2136	265.234	1.79914	0.000345001	Up	3.06019e-06	NA	NA	NA	NA	gi|762141865|ref|XP_011454130.1|//PREDICTED: uncharacterized protein LOC105346989 [Crassostrea gigas]
Unigene0012018	226	3.483	40.4282	3.53696	8.17456e-06	Up	3.24862e-08	NA	NA	NA	NA	NA
Unigene0015543	2503	632.445	296.579	-1.09252	0.00512728	Down	0.000118996	GO:0034464//BBSome	NA	GO:0035058	K16746//Bardet-Biedl syndrome 1 protein	gi|762080493|ref|XP_011417321.1|//PREDICTED: Bardet-Biedl syndrome 1 protein-like isoform X3 [Crassostrea gigas]
Unigene0015838	2346	355.538	1000.65	1.49286	1.47165e-07	Up	4.0705e-10	NA	NA	NA	K13023//carboxypeptidase N regulatory subunit;K17256//insulin-like growth factor-binding protein complex acid labile subunit;K06850//slit 3	gi|762088891|ref|XP_011426773.1|//PREDICTED: slit homolog 1 protein-like [Crassostrea gigas]
Unigene0013896	4360	455.78	1145.36	1.32939	4.76088e-11	Up	6.96257e-14	NA	NA	NA	K09228//KRAB domain-containing zinc finger protein	gi|762124766|ref|XP_011445402.1|//PREDICTED: zinc finger protein 184-like [Crassostrea gigas]
Unigene0019806	1334	477.746	227.526	-1.07021	0.0141309	Down	0.000471289	NA	NA	NA	K00901//diacylglycerol kinase (ATP) [EC:2.7.1.107]	gi|762097141|ref|XP_011431129.1|//PREDICTED: sterile alpha motif domain-containing protein 15-like [Crassostrea gigas]
Unigene0021632	1098	118.348	289.605	1.29106	0.000124717	Up	8.20766e-07	NA	NA	NA	K04550//low-density lipoprotein receptor-related protein 1 (alpha-2-macroglobulin receptor)	gi|405953888|gb|EKC21459.1|//Sortilin-related receptor [Crassostrea gigas]
Unigene0008143	3090	95.2916	44.2442	-1.10686	0.0104346	Down	0.000304692	NA	NA	NA	K05659//ATP-binding cassette, subfamily B (MDR/TAP), member 4 [EC:3.6.3.44];K05658//ATP-binding cassette, subfamily B (MDR/TAP), member 1 [EC:3.6.3.44]	gi|356650030|gb|AET34454.1|//P-glycoprotein [Crassostrea ariakensis]
Unigene0017991	1671	1678.19	813.333	-1.04499	0.000339544	Down	2.9761e-06	NA	NA	NA	NA	gi|762079773|ref|XP_011413504.1|//PREDICTED: uncharacterized protein LOC105318227 [Crassostrea gigas]
Unigene0019931	1319	413.574	904.315	1.12868	0.000403645	Up	3.86279e-06	NA	NA	NA	NA	gi|762155532|ref|XP_011415872.1|//PREDICTED: uncharacterized protein LOC105319864 [Crassostrea gigas]
Unigene0009538	921	321.272	122.035	-1.3965	0.0122776	Down	0.000384481	NA	GO:0016874//ligase activity	NA	K01966//propionyl-CoA carboxylase beta chain [EC:6.4.1.3]	gi|405978690|gb|EKC43060.1|//Propionyl-CoA carboxylase beta chain, mitochondrial [Crassostrea gigas]
Unigene0021926	1070	36.2763	7.81383	-2.21492	0.0171938	Down	0.000635733	NA	NA	NA	K18032//receptor-type tyrosine-protein phosphatase A [EC:3.1.3.48]	gi|762091365|ref|XP_011428077.1|//PREDICTED: multiple epidermal growth factor-like domains protein 10 [Crassostrea gigas]
Unigene0027196	642	5.35677	21.5268	2.0067	0.0375506	Up	0.00196742	NA	NA	NA	K06237//collagen, type IV, alpha	gi|762097596|ref|XP_011431371.1|//PREDICTED: complement C1q tumor necrosis factor-related protein 3-like [Crassostrea gigas]
Unigene0016744	2003	24.2412	104.105	2.10251	0.00760243	Up	0.000196502	NA	NA	NA	K16353//protein sidekick	gi|405977755|gb|EKC42189.1|//Caprin-2 [Crassostrea gigas]
Unigene0007473	801	2563.46	1251.79	-1.03409	0.00318295	Down	5.97043e-05	NA	NA	NA	K11995//deoxyribonuclease-1-like protein [EC:3.1.21.-]	gi|762154353|ref|XP_011415242.1|//PREDICTED: uncharacterized protein LOC105319406 [Crassostrea gigas]
Unigene0006696	399	76.3497	16.1514	-2.24096	0.000135442	Down	9.17186e-07	NA	NA	NA	NA	NA
Unigene0004003	400	52.0619	190.047	1.86806	0.000556634	Up	5.80454e-06	NA	NA	NA	K16060//baculoviral IAP repeat-containing protein 2/3;K16061//baculoviral IAP repeat-containing protein 7/8;K04725//E3 ubiquitin-protein ligase XIAP [EC:2.3.2.27]	gi|762149958|ref|XP_011412926.1|//PREDICTED: baculoviral IAP repeat-containing protein 7-A-like [Crassostrea gigas]
Unigene0023429	925	135.66	61.5636	-1.13985	0.0471974	Down	0.00273663	NA	NA	GO:0007165//signal transduction	K04729//myeloid differentiation primary response protein MyD88	gi|765826367|ref|NP_001292286.1|//myeloid differentiation primary response protein MyD88-like [Crassostrea gigas]
Unigene0006190	1226	32.1406	132.713	2.04585	4.16579e-05	Up	2.18527e-07	GO:0031224//intrinsic component of membrane	GO:0016811//hydrolase activity, acting on carbon-nitrogen (but not peptide) bonds, in linear amides;GO:0035091//phosphatidylinositol binding	GO:0044763//single-organism cellular process;GO:0002376//immune system process;GO:0006575//cellular modified amino acid metabolic process;GO:0006954//inflammatory response	K08069//pantetheine hydrolase [EC:3.5.1.92]	gi|762138407|ref|XP_011452523.1|//PREDICTED: pantetheinase-like [Crassostrea gigas]
Unigene0027918	595	165.894	684.795	2.04541	0.0335669	Up	0.00168507	NA	NA	NA	NA	gi|762156219|ref|XP_011416233.1|//PREDICTED: uncharacterized protein LOC105320127 [Crassostrea gigas]
Unigene0021792	1086	118.551	264.671	1.1587	0.0334369	Up	0.00167642	NA	NA	NA	NA	gi|762097773|ref|XP_011431465.1|//PREDICTED: acetylcholine receptor subunit alpha-type unc-38-like [Crassostrea gigas]
Unigene0015982	2285	2207.26	949.076	-1.21766	0.0178651	Down	0.000671812	GO:0016020//membrane	GO:0050136//NADH dehydrogenase (quinone) activity;GO:0009055//electron carrier activity;GO:0008137//NADH dehydrogenase (ubiquinone) activity;GO:0051536//iron-sulfur cluster binding;GO:0051540//metal cluster binding	GO:0022904//respiratory electron transport chain;GO:0042773//ATP synthesis coupled electron transport	K03934//NADH dehydrogenase (ubiquinone) Fe-S protein 1 [EC:1.6.5.3 1.6.99.3]	gi|405977043|gb|EKC41515.1|//NADH-ubiquinone oxidoreductase 75 kDa subunit, mitochondrial [Crassostrea gigas]
Unigene0026405	692	1291.35	489.151	-1.40053	5.39198e-06	Down	2.02281e-08	NA	NA	NA	NA	gi|762140165|ref|XP_011453245.1|//PREDICTED: uncharacterized protein LOC105346399 isoform X1 [Crassostrea gigas]
Unigene0005617	1287	563.831	203.253	-1.47199	0.00907081	Down	0.000248875	NA	NA	NA	NA	gi|762109192|ref|XP_011437248.1|//PREDICTED: uncharacterized protein C1orf177 homolog [Crassostrea gigas]
Unigene0020596	1232	230.341	106.624	-1.11124	0.0268097	Down	0.00118477	NA	NA	NA	NA	gi|762137338|ref|XP_011451962.1|//PREDICTED: deleted in lung and esophageal cancer protein 1-like isoform X4 [Crassostrea gigas]
Unigene0005288	568	80.9014	181.744	1.16767	0.0141309	Up	0.000470055	NA	NA	NA	NA	NA
Unigene0030810	1564	43.0482	125.421	1.54276	0.0213648	Up	0.000867388	NA	NA	NA	K16060//baculoviral IAP repeat-containing protein 2/3;K16061//baculoviral IAP repeat-containing protein 7/8	gi|405978031|gb|EKC42449.1|//Baculoviral IAP repeat-containing protein 7-A [Crassostrea gigas]
Unigene0021554	1113	1219.72	2460.45	1.01237	0.0120864	Up	0.000373521	NA	NA	NA	NA	gi|405960846|gb|EKC26720.1|//hypothetical protein CGI_10028256 [Crassostrea gigas]
Unigene0012563	587	11.842	1.90961	-2.63256	0.00294081	Down	5.32528e-05	NA	NA	NA	NA	NA
Unigene0028739	541	22.3242	69.4419	1.6372	0.015719	Up	0.000553401	NA	NA	NA	NA	gi|762167085|ref|XP_011421861.1|//PREDICTED: uncharacterized protein LOC105324477 isoform X1 [Crassostrea gigas]
Unigene0014010	4070	605.872	140.004	-2.11354	1.63371e-22	Down	8.82973e-26	GO:0031224//intrinsic component of membrane;GO:0016020//membrane	GO:0005326//neurotransmitter transporter activity;GO:0015291//secondary active transmembrane transporter activity;GO:0015293//symporter activity	GO:0006810//transport;GO:0044765//single-organism transport	K05038//solute carrier family 6 (neurotransmitter transporter, amino acid) member 5/7/9/14	gi|405951058|gb|EKC19003.1|//Sodium- and chloride-dependent glycine transporter 2 [Crassostrea gigas]
Unigene0026196	706	4.30448	16.7371	1.95914	0.0428852	Up	0.00238054	NA	NA	NA	NA	NA
Unigene0007668	697	3433.16	569.422	-2.59197	4.74173e-12	Down	6.33156e-15	NA	NA	NA	K04550//low-density lipoprotein receptor-related protein 1 (alpha-2-macroglobulin receptor)	gi|255918310|gb|ACU33970.1|//low-density lipoprotein receptor precursor [Crassostrea angulata]
Unigene0022488	1012	26.8669	72.1233	1.42464	0.00843526	Up	0.000223707	NA	NA	NA	NA	NA
Unigene0020721	1214	221.155	75.4123	-1.55219	0.000567447	Down	5.93534e-06	NA	NA	NA	K12855//pre-mRNA-processing factor 6;K06252//tenascin	gi|762138051|ref|XP_011452335.1|//PREDICTED: uncharacterized protein LOC105345749 [Crassostrea gigas]
Unigene0007087	1130	824.631	5426.51	2.7182	8.31417e-10	Up	1.5331e-12	NA	NA	NA	NA	gi|762119677|ref|XP_011442752.1|//PREDICTED: uncharacterized protein LOC105339048 [Crassostrea gigas]
Unigene0026611	678	222.532	90.3513	-1.3004	0.0399431	Down	0.00215202	NA	NA	NA	K13172//serine/arginine repetitive matrix protein 2;K12172//E3 SUMO-protein ligase RanBP2	gi|405973903|gb|EKC38592.1|//Spermatogenesis-associated protein 6 [Crassostrea gigas]
Unigene0000338	541	131.692	306.538	1.2189	0.000221966	Up	1.75009e-06	NA	NA	NA	NA	gi|762114258|ref|XP_011439903.1|//PREDICTED: huntingtin-interacting protein 1-related protein-like, partial [Crassostrea gigas]
Unigene0027561	614	150.145	55.4758	-1.43643	0.00109885	Down	1.37471e-05	NA	NA	NA	NA	gi|405951995|gb|EKC19856.1|//hypothetical protein CGI_10007417 [Crassostrea gigas]
Unigene0015768	2375	149.297	337.218	1.1755	0.000497081	Up	5.01661e-06	NA	NA	NA	K15743//carboxylesterase 3/5 [EC:3.1.1.1];K03927//carboxylesterase 2 [EC:3.1.1.1 3.1.1.84 3.1.1.56];K01050//cholinesterase [EC:3.1.1.8]	gi|762111620|ref|XP_011438528.1|//PREDICTED: fatty acyl-CoA hydrolase precursor, medium chain-like [Crassostrea gigas]
Unigene0014663	3123	899.738	339.464	-1.40625	1.86902e-07	Down	5.34788e-10	NA	NA	NA	K17570//hydrocephalus-inducing protein	gi|762091161|ref|XP_011427970.1|//PREDICTED: cilia- and flagella-associated protein 221-like [Crassostrea gigas]
Unigene0004005	815	106.546	409.52	1.94245	6.62138e-06	Up	2.61032e-08	NA	NA	NA	K16060//baculoviral IAP repeat-containing protein 2/3;K16061//baculoviral IAP repeat-containing protein 7/8	gi|762149958|ref|XP_011412926.1|//PREDICTED: baculoviral IAP repeat-containing protein 7-A-like [Crassostrea gigas]
Unigene0000215	200	216.631	88.0283	-1.2992	0.0112048	Down	0.000335924	NA	NA	NA	NA	gi|762108573|ref|XP_011436913.1|//PREDICTED: protein TBATA-like isoform X4 [Crassostrea gigas]
Unigene0033193	904	1352.81	563.059	-1.26461	0.000690201	Down	7.724e-06	NA	NA	NA	K07197//sterol regulatory element-binding transcription factor 1	gi|762078085|ref|XP_011452106.1|//PREDICTED: sterol regulatory element-binding protein 1-like [Crassostrea gigas]
Unigene0007222	992	1314.12	566.914	-1.21289	0.00169622	Down	2.48603e-05	NA	NA	NA	NA	gi|762134537|ref|XP_011450497.1|//PREDICTED: protein FAM154B-like isoform X2 [Crassostrea gigas]
Unigene0010698	1016	186.993	74.0086	-1.33722	0.0249806	Down	0.00107693	NA	GO:0000166//nucleotide binding	NA	K10408//dynein heavy chain, axonemal	gi|405976574|gb|EKC41076.1|//Dynein beta chain, ciliary [Crassostrea gigas]
Unigene0018781	1510	327.335	126.776	-1.36848	0.0129552	Down	0.000417232	NA	NA	NA	K03283//heat shock 70kDa protein 1/8	gi|762098572|ref|XP_011431680.1|//PREDICTED: heat shock 70 kDa protein 12A-like [Crassostrea gigas]
Unigene0010244	446	55.1042	21.3618	-1.36713	0.00893163	Down	0.000242785	GO:0016020//membrane	NA	NA	K11810//MFS transporter, MCP family, solute carrier family 16 (monocarboxylic acid transporters), member 12	gi|762138793|ref|XP_011452730.1|//PREDICTED: monocarboxylate transporter 5-like isoform X3 [Crassostrea gigas]
Unigene0019450	1378	1380.79	3119.4	1.17577	7.79042e-07	Up	2.42723e-09	NA	NA	NA	K01025	gi|762108622|ref|XP_011436939.1|//PREDICTED: sulfotransferase 1A1-like [Crassostrea gigas]
Unigene0024233	850	32.3935	99.2958	1.61603	0.0110331	Up	0.000327968	NA	NA	NA	NA	gi|405964763|gb|EKC30212.1|//hypothetical protein CGI_10020385 [Crassostrea gigas]
Unigene0005358	1533	132.451	320.069	1.27292	0.000185766	Up	1.34656e-06	NA	NA	NA	K08106//N-acetylgalactosamine 4-sulfate 6-O-sulfotransferase [EC:2.8.2.33]	gi|762122059|ref|XP_011443975.1|//PREDICTED: uncharacterized protein LOC105339894 [Crassostrea gigas]
Unigene0011248	327	315.946	138.265	-1.19224	0.00126489	Down	1.68497e-05	GO:0030991//intraciliary transport particle A	NA	NA	K19675//intraflagellar transport protein 43	gi|762104564|ref|XP_011434826.1|//PREDICTED: intraflagellar transport protein 43 homolog A-like isoform X2 [Crassostrea gigas]
Unigene0002681	565	217.366	89.6106	-1.27838	0.0216363	Down	0.00088185	NA	NA	NA	K18709//speckle targeted PIP5K1A-regulated poly(A) polymerase [EC:2.7.7.19 2.7.7.52]	gi|405976062|gb|EKC40583.1|//Poly(A) RNA polymerase, mitochondrial [Crassostrea gigas]
Unigene0024378	842	472.205	191.055	-1.30542	0.0407807	Down	0.00221309	GO:0043231//intracellular membrane-bounded organelle;GO:0005634//nucleus	GO:0097159//organic cyclic compound binding;GO:0046914//transition metal ion binding;GO:0008270//zinc ion binding;GO:0003676//nucleic acid binding	NA	K12826//splicing factor 3A subunit 2	gi|919026992|ref|XP_013397292.1|//PREDICTED: LOW QUALITY PROTEIN: splicing factor 3A subunit 2-like [Lingula anatina]
Unigene0015927	2299	514.508	205.263	-1.32572	4.0131e-05	Down	2.0669e-07	NA	NA	NA	K15043//importin subunit alpha-2	gi|405951558|gb|EKC19461.1|//Ankyrin and armadillo repeat-containing protein [Crassostrea gigas]
Unigene0017817	1713	204.091	87.7512	-1.21772	0.020513	Down	0.000819111	NA	NA	NA	K08585//calpain, invertebrate [EC:3.4.22.-];K08573//calpain-3 [EC:3.4.22.54];K01367//calpain-1 [EC:3.4.22.52];K08578//calpain-9 [EC:3.4.22.-];K03853//calpain-2 [EC:3.4.22.53]	gi|762152687|ref|XP_011414355.1|//PREDICTED: calpain-9-like isoform X2 [Crassostrea gigas]
Unigene0009384	1027	43.9318	15.4144	-1.51099	0.021138	Down	0.000854149	NA	NA	NA	NA	gi|762108463|ref|XP_011436857.1|//PREDICTED: uncharacterized protein LOC105334930 isoform X6 [Crassostrea gigas]
Unigene0024265	846	90.373	15.7823	-2.51758	1.55849e-05	Down	6.78809e-08	NA	NA	NA	NA	gi|762167902|ref|XP_011422297.1|//PREDICTED: uncharacterized protein LOC105324809 [Crassostrea gigas]
Unigene0027723	608	172.115	346.568	1.00976	0.00462316	Up	0.000103181	NA	NA	NA	NA	NA
Unigene0022785	982	48.6583	135.104	1.47331	0.00242781	Up	3.97578e-05	NA	NA	NA	K08530//peroxisome proliferator-activated receptor gamma;K07294//peroxisome proliferator-activated receptor alpha;K04504//peroxisome proliferator-activated receptor delta	gi|762164408|ref|XP_011420515.1|//PREDICTED: peroxisome proliferator-activated receptor delta-like [Crassostrea gigas]
Unigene0004278	1023	580.24	1256.03	1.11415	0.000186357	Up	1.38071e-06	NA	GO:0016763//transferase activity, transferring pentosyl groups	GO:0055086//nucleobase-containing small molecule metabolic process;GO:1901564//organonitrogen compound metabolic process	K00758//thymidine phosphorylase [EC:2.4.2.4]	gi|405969967|gb|EKC34910.1|//Thymidine phosphorylase [Crassostrea gigas]
Unigene0012750	438	52.2196	1537.03	4.87941	4.53574e-36	Up	1.00942e-39	GO:0043229//intracellular organelle	NA	NA	NA	gi|294874902|ref|XP_002767144.1|//centromere protein a, putative [Perkinsus marinus ATCC 50983]
Unigene0017638	1756	121.741	282.171	1.21276	0.000351725	Up	3.15461e-06	NA	NA	NA	NA	gi|762135082|ref|XP_011450783.1|//PREDICTED: uncharacterized protein LOC105344653 [Crassostrea gigas]
Unigene0008420	2855	2342.64	950.879	-1.3008	0.00112252	Down	1.43288e-05	NA	NA	NA	K00939//adenylate kinase [EC:2.7.4.3]	gi|405972862|gb|EKC37609.1|//Adenylate kinase isoenzyme 5 [Crassostrea gigas]
Unigene0028758	548	14.1006	38.1369	1.43543	0.0449093	Up	0.00255287	NA	NA	NA	K11968//ariadne-1 [EC:2.3.2.27]	gi|405963601|gb|EKC29163.1|//ariadne-1-like protein [Crassostrea gigas]
Unigene0024608	823	21.0199	52.134	1.31047	0.0293438	Up	0.00136298	NA	NA	NA	K11428//histone-lysine N-methyltransferase SETD8 [EC:2.1.1.43]	gi|762149313|ref|XP_011412594.1|//PREDICTED: uncharacterized protein LOC105317600 isoform X2 [Crassostrea gigas]
Unigene0020943	1188	6736.65	14748.2	1.13043	0.000831796	Up	9.81103e-06	NA	NA	NA	NA	gi|405963510|gb|EKC29075.1|//Exocyst complex component 2 [Crassostrea gigas]
Unigene0003363	545	29.5387	78.4264	1.40873	0.0473806	Up	0.00275963	NA	NA	NA	NA	gi|405978844|gb|EKC43205.1|//hypothetical protein CGI_10027303 [Crassostrea gigas]
Unigene0022669	997	9.15736	87.6222	3.25829	5.73292e-06	Up	2.16894e-08	NA	NA	NA	K06237//collagen, type IV, alpha;K07296//adiponectin;K19721//collagen, type V/XI/XXIV/XXVII, alpha	gi|405951278|gb|EKC19205.1|//Multimerin-2 [Crassostrea gigas]
Unigene0032089	551	7992.15	866.437	-3.20542	1.72086e-05	Down	7.76889e-08	NA	NA	NA	NA	gi|762087568|ref|XP_011426077.1|//PREDICTED: uncharacterized protein LOC105327354 [Crassostrea gigas]
Unigene0015706	2421	584.54	261.642	-1.15971	3.4546e-05	Down	1.68398e-07	NA	GO:0043168//anion binding;GO:0016642//oxidoreductase activity, acting on the CH-NH2 group of donors, disulfide as acceptor;GO:0004375//glycine dehydrogenase (decarboxylating) activity	GO:0006546//glycine catabolic process;GO:0006544//glycine metabolic process;GO:0055114//oxidation-reduction process	K00281//glycine dehydrogenase [EC:1.4.4.2]	gi|405978349|gb|EKC42749.1|//Glycine dehydrogenase [decarboxylating], mitochondrial [Crassostrea gigas]
Unigene0027340	629	33.6365	71.4738	1.08739	0.0350986	Up	0.00179432	NA	NA	NA	NA	gi|585709967|ref|XP_006824453.1|//PREDICTED: uncharacterized protein LOC102801626 [Saccoglossus kowalevskii]
Unigene0007276	1063	665.461	1556.03	1.22544	0.0170737	Up	0.00062858	NA	NA	NA	NA	gi|762076615|ref|XP_011446463.1|//PREDICTED: uncharacterized protein LOC105341577 [Crassostrea gigas]
Unigene0019378	1407	34.4426	85.8456	1.31755	0.0435774	Up	0.00244236	NA	NA	NA	K06820//plexin A	gi|762156043|ref|XP_011416137.1|//PREDICTED: plexin A3-like [Crassostrea gigas]
Unigene0018181	1634	563.948	234.787	-1.26421	0.00079877	Down	9.26355e-06	NA	NA	NA	K13807//serine/threonine-protein phosphatase with EF-hands [EC:3.1.3.16];K11823//sulfotransferase 4A1 [EC:2.8.2.-]	gi|762151064|ref|XP_011413508.1|//PREDICTED: EF-hand calcium-binding domain-containing protein 6-like isoform X4 [Crassostrea gigas]
Unigene0033330	249	170.825	792.817	2.21446	9.66111e-09	Up	2.27291e-11	NA	NA	NA	NA	gi|762086876|ref|XP_011425721.1|//PREDICTED: mulatexin-like [Crassostrea gigas]
Unigene0002777	912	118.838	22.7558	-2.3847	0.00539225	Down	0.000128374	NA	NA	NA	NA	gi|762093835|ref|XP_011429383.1|//PREDICTED: uncharacterized protein LOC105329722 isoform X1 [Crassostrea gigas]
Unigene0030850	1832	828.404	347.298	-1.25416	0.002312	Down	3.75607e-05	NA	NA	NA	K16634//ribonuclease inhibitor;K08727//nucleotide-binding oligomerization domain-containing protein 1;K08060//class II, major histocompatibility complex, transactivator	gi|762074950|ref|XP_011439712.1|//PREDICTED: leucine-rich repeat-containing protein 71-like isoform X2 [Crassostrea gigas]
Unigene0027246	639	110.11	257.914	1.22794	0.00367706	Up	7.41163e-05	NA	NA	NA	NA	gi|762170650|ref|XP_011423755.1|//PREDICTED: uncharacterized protein LOC105325762 isoform X2 [Crassostrea gigas]
Unigene0017863	1697	73.485	167.242	1.18641	0.0110748	Up	0.000329561	NA	NA	NA	K17726//leukotriene-B4 20-monooxygenase / phylloquinone omega-hydroxylase [EC:1.14.13.30 1.14.13.194];K07426//cytochrome P450 family 4 subfamily B polypeptide 1 [EC:1.14.14.1]	gi|762100549|ref|XP_011432731.1|//PREDICTED: phylloquinone omega-hydroxylase CYP4F2-like isoform X1 [Crassostrea gigas]
Unigene0011287	396	133.956	56.718	-1.23988	0.00328456	Down	6.29677e-05	NA	NA	NA	NA	gi|405971923|gb|EKC36725.1|//Uncharacterized protein C7orf31 [Crassostrea gigas]
Unigene0025086	785	11.4466	37.566	1.71451	0.0242582	Up	0.00103038	NA	NA	NA	NA	NA
Unigene0020216	1281	1170.83	574.613	-1.02687	0.0134715	Down	0.000441142	NA	NA	NA	NA	gi|405962196|gb|EKC27897.1|//ADAM family mig-17 [Crassostrea gigas]
Unigene0032970	3758	309.492	147.536	-1.06883	0.000278601	Down	2.35607e-06	NA	NA	GO:0006810//transport	K10951//solute carrier family 12 (sodium/potassium/chloride transporter), member 2	gi|762109059|ref|XP_011437174.1|//PREDICTED: solute carrier family 12 member 2-like isoform X2 [Crassostrea gigas]
Unigene0020784	1206	43.4159	110.778	1.35137	0.0025628	Up	4.3672e-05	NA	NA	NA	NA	NA
Unigene0015487	2524	53.5039	126.649	1.24312	0.0288353	Up	0.00132157	NA	GO:0005515//protein binding	GO:0044763//single-organism cellular process;GO:0050794//regulation of cellular process;GO:0048513//animal organ development;GO:0048518//positive regulation of biological process;GO:0044767//single-organism developmental process	K04667//inhibin, beta	gi|405951148|gb|EKC19086.1|//Inhibin beta A chain [Crassostrea gigas]
Unigene0010730	917	19.3181	87.9702	2.18706	0.00492817	Up	0.000112703	NA	NA	NA	K01315//plasminogen [EC:3.4.21.7]	gi|762091621|ref|XP_011428213.1|//PREDICTED: plasminogen-like [Crassostrea gigas]
Unigene0022454	1021	1293.61	461.55	-1.48685	0.000591776	Down	6.32955e-06	NA	NA	NA	K01277//dipeptidyl-peptidase III [EC:3.4.14.4]	gi|762157637|ref|XP_011416978.1|//PREDICTED: cilia- and flagella-associated protein 69-like isoform X1 [Crassostrea gigas]
Unigene0032788	223	45.0319	107.335	1.2531	0.0223938	Up	0.000928388	NA	NA	NA	K01887//arginyl-tRNA synthetase [EC:6.1.1.19];K14721//DNA-directed RNA polymerase III subunit RPC5;K06776//receptor-type tyrosine-protein phosphatase kappa [EC:3.1.3.48]	gi|762086934|ref|XP_011425748.1|//PREDICTED: scavenger receptor class F member 2-like [Crassostrea gigas]
Unigene0003208	241	32.1545	8.43274	-1.93095	0.0236343	Down	0.000991836	NA	NA	NA	NA	gi|762146452|ref|XP_011456523.1|//PREDICTED: uncharacterized protein LOC105348695 [Crassostrea gigas]
Unigene0020264	1267	338.046	692.777	1.03517	0.0468758	Up	0.00269893	NA	NA	NA	K10352//myosin heavy chain	gi|762095415|ref|XP_011430209.1|//PREDICTED: cingulin-like [Crassostrea gigas]
Unigene0010271	1077	19.5544	91.4116	2.22488	0.00516444	Up	0.000120351	NA	NA	NA	NA	gi|762096171|ref|XP_011430607.1|//PREDICTED: multiple epidermal growth factor-like domains protein 11 [Crassostrea gigas]
Unigene0030766	782	370.833	150.39	-1.30206	0.0442315	Down	0.00249465	NA	NA	NA	NA	gi|762158200|ref|XP_011417271.1|//PREDICTED: basal body-orientation factor 1-like isoform X6 [Crassostrea gigas]
Unigene0025872	728	100.376	302.848	1.59318	0.0170587	Up	0.000626228	NA	NA	NA	NA	gi|762080995|ref|XP_011420033.1|//PREDICTED: uncharacterized protein LOC105322828 [Crassostrea gigas]
Unigene0016944	1940	132.506	360.366	1.4434	0.0053015	Up	0.000125318	NA	NA	NA	K12035//tripartite motif-containing protein 71 [EC:2.3.2.27]	gi|762099149|ref|XP_011431989.1|//PREDICTED: E3 ubiquitin-protein ligase TRIM71-like [Crassostrea gigas]
Unigene0032920	1038	405.518	106.186	-1.93317	7.84719e-05	Down	4.74358e-07	NA	NA	NA	NA	gi|762112222|ref|XP_011438840.1|//PREDICTED: uncharacterized protein LOC105336293 [Crassostrea gigas]
Unigene0000209	374	228.808	100.079	-1.19299	0.0117936	Down	0.000361308	NA	NA	NA	NA	gi|762108571|ref|XP_011436912.1|//PREDICTED: protein TBATA-like isoform X3 [Crassostrea gigas]
Unigene0000840	354	147.27	48.0101	-1.61706	0.0429344	Down	0.00238464	NA	NA	NA	NA	NA
Unigene0023998	875	34.0441	82.9441	1.28473	0.00881617	Up	0.000237923	NA	NA	NA	K20478//golgin subfamily B member 1	gi|762092394|ref|XP_011428630.1|//PREDICTED: golgin subfamily B member 1-like isoform X3 [Crassostrea gigas]
Unigene0025263	772	78.144	28.5832	-1.45097	0.0220889	Down	0.000908727	NA	NA	NA	K01648//ATP citrate (pro-S)-lyase [EC:2.3.3.8]	gi|762111275|ref|XP_011438348.1|//PREDICTED: ATP-citrate synthase-like isoform X3 [Crassostrea gigas]
Unigene0027458	624	101.274	313.466	1.63005	4.16246e-06	Up	1.50862e-08	NA	NA	NA	NA	gi|405970941|gb|EKC35803.1|//hypothetical protein CGI_10011199 [Crassostrea gigas]
Unigene0021674	1101	28.407	84.446	1.57178	0.00203816	Up	3.2075e-05	NA	NA	NA	NA	gi|762092757|ref|XP_011428814.1|//PREDICTED: uncharacterized protein LOC105329319 [Crassostrea gigas]
Unigene0019657	1359	49.5657	129.969	1.39076	0.0131817	Up	0.000426204	NA	NA	NA	NA	gi|762113401|ref|XP_011439458.1|//PREDICTED: uncharacterized protein LOC105336723 [Crassostrea gigas]
Unigene0018582	1548	1020.87	465.194	-1.13389	0.00510818	Down	0.000117741	NA	NA	NA	K08727//nucleotide-binding oligomerization domain-containing protein 1	gi|405975257|gb|EKC39838.1|//T-complex-associated testis-expressed protein 1 [Crassostrea gigas]
Unigene0025569	748	8.05001	1.82447	-2.14152	0.0243072	Down	0.00103476	NA	NA	NA	NA	gi|762087338|ref|XP_011425952.1|//PREDICTED: von Willebrand factor D and EGF domain-containing protein-like [Crassostrea gigas]
Unigene0020498	1244	30.2824	4.83756	-2.64613	0.00260518	Down	4.48912e-05	NA	NA	NA	K00500//phenylalanine-4-hydroxylase [EC:1.14.16.1];K15276//solute carrier family 35 (adenosine 3'-phospho 5'-phosphosulfate transporter), member B2;K20100//YTH domain-containing protein 1	gi|762114073|ref|XP_011439809.1|//PREDICTED: uncharacterized protein LOC105336978 isoform X2 [Crassostrea gigas]
Unigene0018124	1642	227.465	101.7	-1.16133	0.00463708	Down	0.000103787	NA	GO:0016746//transferase activity, transferring acyl groups	GO:0044763//single-organism cellular process	K19573//alpha-tubulin N-acetyltransferase 1 [EC:2.3.1.108]	gi|762113007|ref|XP_011439250.1|//PREDICTED: alpha-tubulin N-acetyltransferase-like isoform X1 [Crassostrea gigas]
Unigene0025184	776	31.0354	6.0147	-2.36735	0.00328896	Down	6.31567e-05	NA	NA	NA	NA	NA
Unigene0027137	647	253.425	92.5968	-1.45252	8.33367e-06	Down	3.33834e-08	NA	GO:0005488//binding;GO:0016491//oxidoreductase activity	NA	K07422//cytochrome P450 family 2 subfamily U polypeptide 1;K07418//cytochrome P450 family 2 subfamily J [EC:1.14.14.1]	gi|405958275|gb|EKC24419.1|//Cytochrome P450 2G1 [Crassostrea gigas]
Unigene0006005	290	17.4339	62.7383	1.84745	0.0127329	Up	0.000405406	NA	NA	NA	NA	gi|405970673|gb|EKC35559.1|//hypothetical protein CGI_10012533 [Crassostrea gigas]
Unigene0011073	417	15.1232	50.3946	1.7365	0.0299292	Up	0.00141414	NA	NA	NA	K12855//pre-mRNA-processing factor 6;K10380//ankyrin;K19867//LIM domain-binding protein 3	gi|762117786|ref|XP_011441760.1|//PREDICTED: uncharacterized protein LOC105338372 [Crassostrea gigas]
Unigene0013019	456	4542.78	1201.26	-1.91903	0.00117049	Down	1.51083e-05	NA	NA	NA	K06563//CD209 antigen;K06468//low affinity immunoglobulin epsilon Fc receptor;K17513//C-type lectin superfamily 17 member A	gi|762098545|ref|XP_011431664.1|//PREDICTED: perlucin-like protein [Crassostrea gigas]
Unigene0004454	520	11.2822	44.9324	1.99371	0.00124778	Up	1.64234e-05	NA	NA	NA	K01315//plasminogen [EC:3.4.21.7]	gi|762091621|ref|XP_011428213.1|//PREDICTED: plasminogen-like [Crassostrea gigas]
Unigene0019434	1396	151.147	71.5325	-1.07928	0.0107611	Down	0.0003171	NA	NA	NA	NA	NA
Unigene0009877	1068	11.2246	48.868	2.12222	0.0113943	Up	0.000344141	NA	NA	NA	K06832//galectin-8;K10091//galectin-4	gi|762113261|ref|XP_011439384.1|//PREDICTED: galectin-4-like [Crassostrea gigas]
Unigene0016673	2024	114.909	25.7486	-2.15793	0.0096493	Down	0.000273643	NA	NA	NA	K13297//receptor-type tyrosine-protein phosphatase T [EC:3.1.3.48];K18032//receptor-type tyrosine-protein phosphatase A [EC:3.1.3.48]	gi|762105684|ref|XP_011435415.1|//PREDICTED: uncharacterized protein LOC105333895 isoform X4 [Crassostrea gigas]
Unigene0030113	456	1.8469	18.0327	3.28744	4.51782e-05	Up	2.41303e-07	NA	NA	NA	NA	NA
Unigene0027606	615	203.011	96.0132	-1.08025	0.0481495	Down	0.00281921	NA	NA	NA	K03130//transcription initiation factor TFIID subunit 5	gi|405970410|gb|EKC35318.1|//WD repeat-containing protein 38 [Crassostrea gigas]
Unigene0010816	929	10.9796	40.8354	1.89499	0.0183609	Up	0.000701071	NA	NA	NA	NA	gi|919060192|ref|XP_013411821.1|//PREDICTED: uncharacterized protein LOC106174705 [Lingula anatina]
Unigene0028286	576	11.1841	71.2863	2.67218	5.18663e-05	Up	2.85207e-07	NA	NA	NA	NA	NA
Unigene0010626	1653	102.158	259.305	1.34385	0.00912131	Up	0.00025055	NA	NA	NA	NA	gi|762114553|ref|XP_011440060.1|//PREDICTED: uncharacterized protein LOC105337153 isoform X2 [Crassostrea gigas]
Unigene0030115	456	676.691	3361.2	2.31241	5.39198e-06	Up	2.01734e-08	NA	NA	NA	NA	gi|405978588|gb|EKC42966.1|//hypothetical protein CGI_10023566 [Crassostrea gigas]
Unigene0013486	13706	5542.65	2490.39	-1.15421	0.0101159	Down	0.000290734	GO:0030286//dynein complex;GO:0005875//microtubule associated complex	GO:0005524//ATP binding;GO:0003774//motor activity;GO:0003777//microtubule motor activity;GO:0016887//ATPase activity;GO:0032550//purine ribonucleoside binding	GO:0007018//microtubule-based movement;GO:0006928//movement of cell or subcellular component;GO:0009154//purine ribonucleotide catabolic process	K10408//dynein heavy chain, axonemal	gi|405953044|gb|EKC20777.1|//Dynein beta chain, ciliary [Crassostrea gigas]
Unigene0018774	1511	413.687	43.5942	-3.24633	4.41772e-09	Down	9.41015e-12	GO:0016020//membrane	NA	NA	K15103//solute carrier family 25 (mitochondrial uncoupling protein), member 8/9	gi|762149785|ref|XP_011412833.1|//PREDICTED: mitochondrial uncoupling protein 2-like [Crassostrea gigas]
Unigene0029271	517	156.062	67.9668	-1.19921	0.00921316	Down	0.000254245	NA	NA	NA	K11536//pyrimidine nucleoside transport protein	gi|762105956|ref|XP_011435556.1|//PREDICTED: solute carrier family 28 member 3-like [Crassostrea gigas]
Unigene0012731	399	18.2302	54.9434	1.59162	0.0427216	Up	0.00236739	NA	NA	NA	NA	NA
Unigene0020812	1202	22.1147	61.019	1.46425	0.0443123	Up	0.00250202	NA	NA	NA	NA	gi|762164935|ref|XP_011420791.1|//PREDICTED: dentin sialophosphoprotein-like, partial [Crassostrea gigas]
Unigene0010897	507	72.2122	29.8137	-1.27627	0.0288353	Down	0.00132136	NA	NA	NA	NA	gi|762146452|ref|XP_011456523.1|//PREDICTED: uncharacterized protein LOC105348695 [Crassostrea gigas]
Unigene0005927	570	3650.14	1769.85	-1.04433	6.93943e-07	Down	2.14003e-09	NA	NA	NA	NA	gi|762165137|ref|XP_011420889.1|//PREDICTED: annexin A7-like [Crassostrea gigas]
Unigene0017267	1844	221.345	851.442	1.94361	3.66752e-05	Up	1.82311e-07	NA	NA	NA	K11109//protection of telomeres protein 1	gi|762161774|ref|XP_011419126.1|//PREDICTED: uncharacterized protein LOC105322229 [Crassostrea gigas]
Unigene0021822	1080	23.0619	83.053	1.84852	0.00489011	Up	0.000111316	NA	NA	NA	NA	gi|762123171|ref|XP_011444557.1|//PREDICTED: uncharacterized protein LOC105340297 [Crassostrea gigas]
Unigene0015356	2589	6162.15	2688.3	-1.19674	0.00168802	Down	2.46329e-05	NA	GO:0005509//calcium ion binding	NA	NA	gi|762130855|ref|XP_011448575.1|//PREDICTED: EF-hand domain-containing family member C2-like [Crassostrea gigas]
Unigene0003679	281	142.315	66.4384	-1.099	0.0310665	Down	0.00149634	NA	NA	NA	NA	NA
Unigene0028199	580	2.49508	40.7001	4.02787	6.50345e-09	Up	1.468e-11	NA	NA	NA	NA	gi|405966921|gb|EKC32148.1|//hypothetical protein CGI_10022179 [Crassostrea gigas]
Unigene0002061	340	18.3267	70.9056	1.95196	0.00475011	Up	0.000107223	NA	NA	NA	NA	NA
Unigene0016289	2154	686.556	321.195	-1.09593	0.0107178	Down	0.000314849	NA	NA	NA	K19677//intraflagellar transport protein 81	gi|762125662|ref|XP_011445863.1|//PREDICTED: intraflagellar transport protein 81 homolog [Crassostrea gigas]
Unigene0028164	581	3.41307	12.4719	1.86954	0.0402879	Up	0.00217617	NA	NA	NA	NA	gi|405961068|gb|EKC26925.1|//Laccase-25 [Crassostrea gigas]
Unigene0015349	2594	982.557	2809.45	1.51568	0.00109885	Up	1.37994e-05	NA	NA	NA	K10594//E3 ubiquitin-protein ligase HERC1 [EC:2.3.2.26]	gi|762162156|ref|XP_011419327.1|//PREDICTED: laccase-2-like [Crassostrea gigas]
Unigene0020753	1208	20.0036	52.6995	1.39753	0.0309528	Up	0.00148447	GO:0044424//intracellular part	NA	NA	K10140//DNA damage-binding protein 2	gi|919051568|ref|XP_013407819.1|//PREDICTED: DNA damage-binding protein 2-like isoform X3 [Lingula anatina]
Unigene0015793	2371	264.045	675.724	1.35565	0.00904032	Up	0.000247463	NA	NA	NA	K17495//CUB and sushi domain-containing protein;K17341//hemicentin;K08455//G protein-coupled receptor 112	gi|762122389|ref|XP_011444146.1|//PREDICTED: uncharacterized protein LOC105340014 [Crassostrea gigas]
Unigene0023900	884	774.199	363.87	-1.08928	0.00986176	Down	0.000280923	NA	NA	NA	NA	gi|762170036|ref|XP_011423437.1|//PREDICTED: uncharacterized protein LOC105325519 [Crassostrea gigas]
Unigene0027502	622	312.157	155.224	-1.00792	0.0155167	Down	0.000538204	GO:0016021//integral component of membrane	GO:0004871//signal transducer activity;GO:0004930//G-protein coupled receptor activity	GO:0007186//G-protein coupled receptor signaling pathway;GO:0007165//signal transduction	K04160//5-hydroxytryptamine receptor 4	gi|762096287|ref|XP_011430667.1|//PREDICTED: 5-hydroxytryptamine receptor 4-like [Crassostrea gigas]
Unigene0004910	1023	351.059	775.264	1.14297	0.000632234	Up	6.9748e-06	NA	NA	NA	K15259//poly [ADP-ribose] polymerase 7/11/12/13 [EC:2.4.2.30]	gi|405966718|gb|EKC31961.1|//Poly [ADP-ribose] polymerase 12 [Crassostrea gigas]
Unigene0013715	4997	195.24	863.256	2.14454	0.000103507	Up	6.51569e-07	NA	NA	NA	K13912//deleted in malignant brain tumors 1 protein	gi|762162815|ref|XP_011419684.1|//PREDICTED: coadhesin-like isoform X1 [Crassostrea gigas]
Unigene0022207	1039	34.1743	97.015	1.5053	0.0160633	Up	0.000570442	NA	NA	NA	K09443//ETS-type family, other;K09435//transcriptional regulator ERG;K09436//friend leukemia integration 1 transcription factor	gi|762157369|ref|XP_011416838.1|//PREDICTED: uncharacterized protein LOC105320559 [Crassostrea gigas]
Unigene0019001	1468	26.0788	60.4933	1.2139	0.038283	Up	0.00201675	NA	NA	NA	NA	gi|405973626|gb|EKC38328.1|//Titin [Crassostrea gigas]
Unigene0023044	961	317.431	139.66	-1.18453	0.0343071	Down	0.00173859	NA	NA	NA	NA	gi|762147163|ref|XP_011456886.1|//PREDICTED: uncharacterized protein KIAA1467 homolog [Crassostrea gigas]
Unigene0031956	3795	507.504	1032.78	1.02504	0.0192053	Up	0.000744364	NA	NA	NA	NA	gi|405977458|gb|EKC41909.1|//Phytanoyl-CoA dioxygenase, peroxisomal [Crassostrea gigas]
Unigene0023668	905	11.77	45.4596	1.94946	0.00196196	Up	3.0564e-05	NA	NA	NA	NA	gi|831306355|ref|XP_012685402.1|//PREDICTED: LOW QUALITY PROTEIN: uncharacterized protein LOC105902371 [Clupea harengus]
Unigene0025415	761	301.341	801.61	1.4115	0.000591776	Up	6.34033e-06	GO:0016021//integral component of membrane	NA	NA	NA	gi|762127958|ref|XP_011447070.1|//PREDICTED: uncharacterized protein LOC105341998 [Crassostrea gigas]
Unigene0008026	7517	39.3296	115.112	1.54936	0.0386012	Up	0.00204579	NA	NA	NA	K00025//malate dehydrogenase [EC:1.1.1.37];K14401//cleavage and polyadenylation specificity factor subunit 1;K04612//calcium-sensing receptor	gi|930770222|ref|XP_005949918.2|//PREDICTED: uncharacterized protein LOC102294560 [Haplochromis burtoni]
Unigene0002566	1058	9.68367	31.9935	1.72415	0.0416158	Up	0.0022823	NA	NA	NA	NA	NA
Unigene0013537	6936	3230.79	1214.76	-1.41122	0.00430074	Down	9.31139e-05	GO:0030286//dynein complex	GO:0003774//motor activity;GO:0032550//purine ribonucleoside binding	GO:0048870//cell motility;GO:0009154//purine ribonucleotide catabolic process	K10408//dynein heavy chain, axonemal	gi|871204503|ref|XP_012937272.1|//PREDICTED: dynein heavy chain 5, axonemal-like [Aplysia californica]
Unigene0018908	1488	85.5847	27.398	-1.64328	0.000743582	Down	8.58143e-06	NA	NA	NA	K14425//solute carrier family 12 (sodium/potassium/chloride transporter), member 1;K10951//solute carrier family 12 (sodium/potassium/chloride transporter), member 2	gi|762109057|ref|XP_011437173.1|//PREDICTED: solute carrier family 12 member 3-like isoform X1 [Crassostrea gigas]
Unigene0015841	2346	5706.4	2658.57	-1.10193	7.84719e-05	Down	4.7651e-07	NA	NA	NA	K18629//tektin-2	gi|762169708|ref|XP_011423265.1|//PREDICTED: tektin-2-like [Crassostrea gigas]
Unigene0010016	223	27.7278	5.96461	-2.21683	0.00954979	Down	0.000269	NA	NA	NA	NA	NA
Unigene0006124	2033	501.803	1371.08	1.45012	0.000206974	Up	1.59899e-06	GO:0016020//membrane	GO:0015293//symporter activity	GO:0006810//transport	K05038//solute carrier family 6 (neurotransmitter transporter, amino acid) member 5/7/9/14	gi|762104646|ref|XP_011434868.1|//PREDICTED: sodium- and chloride-dependent GABA transporter 1-like isoform X2 [Crassostrea gigas]
Unigene0017845	1706	230.462	95.3491	-1.27324	0.0165956	Down	0.000599024	NA	NA	NA	NA	gi|405957038|gb|EKC23276.1|//Uncharacterized protein C19orf45 [Crassostrea gigas]
Unigene0027960	594	10906.6	387.726	-4.81402	1.41669e-29	Down	4.95441e-33	NA	NA	NA	K06233//low density lipoprotein-related protein 2	gi|405977564|gb|EKC42007.1|//Low-density lipoprotein receptor [Crassostrea gigas]
Unigene0022262	1038	75.2671	31.8056	-1.24274	0.0285119	Down	0.001293	GO:0016020//membrane	NA	NA	K03847//alpha-1,6-mannosyltransferase [EC:2.4.1.260]	gi|762080928|ref|XP_011419681.1|//PREDICTED: dol-P-Man:Man(7)GlcNAc(2)-PP-Dol alpha-1,6-mannosyltransferase-like [Crassostrea gigas]
Unigene0026909	652	1731.55	850.877	-1.02504	0.0313806	Down	0.00151748	NA	NA	NA	NA	gi|333449471|gb|AEF33421.1|//NAD(P)H:quinone oxidoreductase-like protein [Crassostrea ariakensis]
Unigene0018257	1619	85.2818	253.83	1.57355	1.42075e-05	Up	6.05266e-08	GO:0016020//membrane	GO:0008081//phosphoric diester hydrolase activity	GO:0042439//ethanolamine-containing compound metabolic process	K08743//ectonucleotide pyrophosphatase/phosphodiesterase family member 6 [EC:3.1.4.-]	gi|762115014|ref|XP_011440307.1|//PREDICTED: ectonucleotide pyrophosphatase/phosphodiesterase family member 6-like [Crassostrea gigas]
Unigene0032237	222	469.802	217.965	-1.10796	0.000524496	Down	5.39812e-06	NA	NA	NA	NA	NA
Unigene0010694	594	18.9753	68.4435	1.85079	0.00283027	Up	5.02995e-05	NA	NA	NA	NA	gi|762139166|ref|XP_011452922.1|//PREDICTED: uncharacterized protein LOC105346152 [Crassostrea gigas]
Unigene0033142	464	83.0209	34.8386	-1.25279	0.0317505	Down	0.00154038	NA	NA	NA	NA	NA
Unigene0022617	1005	3.16501	22.3472	2.81981	0.000483599	Up	4.83333e-06	NA	NA	NA	NA	NA
Unigene0014871	2917	613.397	1384.97	1.17496	0.00158742	Up	2.28621e-05	NA	NA	NA	K04232//galanin receptor 3;K04230//galanin receptor 1;K04233//allatostatin receptor	gi|762108378|ref|XP_011436811.1|//PREDICTED: C-C chemokine receptor type 6-like [Crassostrea gigas]
Unigene0009907	896	5.64429	81.6132	3.85394	4.89307e-08	Up	1.2445e-10	NA	NA	NA	NA	NA
Unigene0030563	317	5.67476	34.0078	2.58324	0.00373453	Up	7.63434e-05	NA	NA	NA	NA	gi|762166079|ref|XP_011421354.1|//PREDICTED: uncharacterized protein LOC105323990 [Crassostrea gigas]
Unigene0005360	664	73.982	178.026	1.26684	0.000186357	Up	1.38639e-06	NA	NA	NA	K08106//N-acetylgalactosamine 4-sulfate 6-O-sulfotransferase [EC:2.8.2.33]	gi|762139284|ref|XP_011452986.1|//PREDICTED: carbohydrate sulfotransferase 15-like [Crassostrea gigas]
Unigene0015297	2622	8.19051	31.9831	1.96528	0.0138655	Up	0.000456385	GO:0016020//membrane;GO:0044464//cell part	NA	GO:0050896//response to stimulus	K17233//dual oxidase maturation factor 1	gi|762097716|ref|XP_011431435.1|//PREDICTED: dual oxidase maturation factor 1-like [Crassostrea gigas]
Unigene0016572	2054	224.627	82.0537	-1.45289	7.26936e-05	Down	4.27555e-07	GO:0016021//integral component of membrane	GO:0008270//zinc ion binding;GO:0019706//protein-cysteine S-palmitoyltransferase activity	NA	K18932//palmitoyltransferase [EC:2.3.1.225]	gi|762150269|ref|XP_011413087.1|//PREDICTED: palmitoyltransferase ZDHHC22-like [Crassostrea gigas]
Unigene0012234	566	60.1202	17.7379	-1.76102	0.0314258	Down	0.00152263	NA	NA	NA	NA	gi|762153389|ref|XP_011414729.1|//PREDICTED: uncharacterized protein LOC105319042 [Crassostrea gigas]
Unigene0024691	818	47.2038	12.2484	-1.94631	0.0141309	Down	0.000471347	NA	NA	NA	NA	gi|688551614|ref|XP_009299201.1|//PREDICTED: uncharacterized protein LOC103910936 [Danio rerio]
Unigene0010667	1686	238.204	106.088	-1.16694	0.000164775	Down	1.15773e-06	NA	NA	NA	NA	gi|762087331|ref|XP_011425949.1|//PREDICTED: protein bunched, class 2/F/G isoform-like [Crassostrea gigas]
Unigene0009580	1581	294.124	143.137	-1.03902	0.0465061	Down	0.00266877	NA	NA	NA	NA	gi|762109516|ref|XP_011437417.1|//PREDICTED: uncharacterized protein LOC105335291 [Crassostrea gigas]
Unigene0001447	1046	186.359	392.336	1.074	0.00593689	Up	0.000144015	NA	NA	NA	K19538//retinitis pigmentosa 1	gi|762115829|ref|XP_011440728.1|//PREDICTED: neurofilament heavy polypeptide-like isoform X2 [Crassostrea gigas]
Unigene0026353	697	97.1176	202.82	1.06239	0.00997234	Up	0.000285658	NA	NA	NA	K11997//tripartite motif-containing protein 2/3;K12035//tripartite motif-containing protein 71 [EC:2.3.2.27]	gi|762140280|ref|XP_011453306.1|//PREDICTED: tripartite motif-containing protein 45-like isoform X1 [Crassostrea gigas]
Unigene0022056	1062	20.2539	57.2616	1.49937	0.0408679	Up	0.00222699	NA	NA	NA	NA	gi|762085926|ref|XP_011425282.1|//PREDICTED: mucin-17-like [Crassostrea gigas]
Unigene0025097	781	14.9709	80.8633	2.43333	0.00199025	Up	3.11313e-05	NA	NA	NA	NA	gi|762107902|ref|XP_011436570.1|//PREDICTED: sterile alpha motif domain-containing protein 9-like [Crassostrea gigas]
Unigene0022248	1040	1746.79	753.191	-1.21362	0.00183186	Down	2.78384e-05	NA	NA	NA	NA	gi|405976502|gb|EKC41007.1|//Uncharacterized protein C17orf98 [Crassostrea gigas]
Unigene0028696	552	129.959	457.525	1.81579	6.93485e-07	Up	2.11657e-09	NA	NA	NA	NA	NA
Unigene0021133	1166	242.331	117.55	-1.04371	0.0041033	Down	8.76651e-05	NA	NA	NA	NA	NA
Unigene0021076	1171	231.84	553.686	1.25594	0.00513103	Up	0.000119247	NA	NA	NA	K12816//pre-mRNA-processing factor 17	gi|762105079|ref|XP_011435094.1|//PREDICTED: uncharacterized protein LOC105333700 [Crassostrea gigas]
Unigene0016776	1995	440.095	1175.88	1.41785	0.000116038	Up	7.52583e-07	NA	NA	NA	K13172//serine/arginine repetitive matrix protein 2	gi|762104909|ref|XP_011435005.1|//PREDICTED: uncharacterized protein LOC105333636 isoform X1 [Crassostrea gigas]
Unigene0032967	368	186.129	84.6128	-1.13736	0.000393736	Down	3.70528e-06	NA	NA	NA	NA	NA
Unigene0002122	626	30.0962	115.366	1.93856	0.0070758	Up	0.000178616	NA	NA	NA	NA	gi|762097622|ref|XP_011431386.1|//PREDICTED: uncharacterized protein LOC105331053 [Crassostrea gigas]
Unigene0016924	1943	88.4641	43.082	-1.03801	0.0386642	Down	0.00205158	NA	NA	NA	NA	gi|762143494|ref|XP_011455000.1|//PREDICTED: focadhesin-like [Crassostrea gigas]
Unigene0013427	747	81.3815	287.777	1.82218	1.17413e-06	Up	3.84482e-09	NA	NA	NA	K02599//Notch 1;K14379//tartrate-resistant acid phosphatase type 5 [EC:3.1.3.2]	gi|405961595|gb|EKC27374.1|//Anosmin-1 [Crassostrea gigas]
Unigene0017729	1730	406.454	156.471	-1.3772	0.000204497	Down	1.57336e-06	NA	NA	NA	K01047//secretory phospholipase A2 [EC:3.1.1.4]	gi|762109968|ref|XP_011437652.1|//PREDICTED: group XIIA secretory phospholipase A2-like [Crassostrea gigas]
Unigene0027534	618	65.893	303.043	2.20132	1.99175e-07	Up	5.76236e-10	NA	NA	NA	NA	NA
Unigene0020665	1220	68.4585	196.423	1.52066	0.0456004	Up	0.0026052	NA	NA	NA	K03909//tissue factor pathway inhibitor	gi|405972638|gb|EKC37398.1|//Protein AMBP [Crassostrea gigas]
Unigene0017805	1717	154.63	691.265	2.16042	0.00128299	Up	1.71723e-05	NA	NA	NA	NA	gi|762096991|ref|XP_011431050.1|//PREDICTED: uncharacterized protein LOC105330830 [Crassostrea gigas]
Unigene0023006	959	432.524	943.529	1.12529	0.000340336	Up	2.99717e-06	NA	NA	NA	NA	gi|405967569|gb|EKC32717.1|//3-demethylubiquinone-9 3-methyltransferase [Crassostrea gigas]
Unigene0019323	1416	114.282	496.371	2.11882	2.51425e-06	Up	8.8727e-09	NA	NA	NA	K03927//carboxylesterase 2 [EC:3.1.1.1 3.1.1.84 3.1.1.56];K01050//cholinesterase [EC:3.1.1.8]	gi|762077232|ref|XP_011449686.1|//PREDICTED: carboxylesterase 1C-like [Crassostrea gigas]
Unigene0027910	589	38.7682	8.5038	-2.18869	0.0158757	Down	0.000561761	NA	NA	NA	NA	NA
Unigene0025115	781	73.8778	202.613	1.45551	0.00279537	Up	4.92349e-05	NA	NA	NA	NA	gi|762121344|ref|XP_011443598.1|//PREDICTED: von Willebrand factor D and EGF domain-containing protein-like [Crassostrea gigas]
Unigene0024126	862	40.8043	9.96774	-2.03338	0.00334424	Down	6.45371e-05	GO:0016021//integral component of membrane	GO:0047750//cholestenol delta-isomerase activity	GO:0016125//sterol metabolic process	NA	gi|762162022|ref|XP_011419257.1|//PREDICTED: uncharacterized protein LOC105322314 [Crassostrea gigas]
Unigene0017903	1693	6.19709	24.5632	1.98683	0.04246	Up	0.00234614	NA	NA	NA	NA	NA
Unigene0022504	1014	26.8925	62.699	1.22124	0.0486368	Up	0.00287145	NA	NA	NA	K09186//histone-lysine N-methyltransferase MLL1 [EC:2.1.1.43]	gi|762144121|ref|XP_011455325.1|//PREDICTED: histone-lysine N-methyltransferase 2A-like [Crassostrea gigas]
Unigene0018108	1648	103.644	293.274	1.50061	0.000381384	Up	3.50416e-06	NA	NA	NA	K00753//glycoprotein 3-alpha-L-fucosyltransferase [EC:2.4.1.214];K14464//alpha-1,3-fucosyltransferase [EC:2.4.1.-]	gi|762076669|ref|XP_011446759.1|//PREDICTED: glycoprotein 3-alpha-L-fucosyltransferase A-like [Crassostrea gigas]
Unigene0022867	978	26182.6	10150.2	-1.3671	3.02507e-10	Down	4.80871e-13	GO:0043231//intracellular membrane-bounded organelle;GO:0000785//chromatin	GO:0003676//nucleic acid binding	GO:0034728//nucleosome organization	K11275//histone H1/5	gi|405946497|gb|EKC17653.1|//Histone H1-delta [Crassostrea gigas]
Unigene0001832	558	63.8276	177.14	1.47264	9.34308e-06	Up	3.80211e-08	NA	NA	NA	NA	gi|762155965|ref|XP_011416096.1|//PREDICTED: scaffold attachment factor B1-like isoform X3 [Crassostrea gigas]
Unigene0030827	3982	311.189	139.462	-1.15792	0.00261497	Down	4.5143e-05	NA	NA	GO:0044763//single-organism cellular process	K06677//condensin complex subunit 1	gi|762119189|ref|XP_011442495.1|//PREDICTED: condensin complex subunit 1-like isoform X3 [Crassostrea gigas]
Unigene0029183	524	23.978	5.8919	-2.02491	0.0367584	Down	0.00191891	NA	NA	NA	NA	NA
Unigene0012598	393	69.1238	166.593	1.26907	0.000351725	Up	3.16456e-06	NA	NA	NA	NA	gi|405951847|gb|EKC19722.1|//Acetylcholine receptor subunit delta [Crassostrea gigas]
Unigene0017120	1886	63.6626	173.869	1.44948	0.0205084	Up	0.000817625	GO:0016021//integral component of membrane	NA	NA	NA	gi|762126591|ref|XP_011446356.1|//PREDICTED: uncharacterized protein LOC105341499 [Crassostrea gigas]
Unigene0033197	809	5754.85	14710	1.35395	0.00320373	Up	6.01961e-05	NA	NA	NA	NA	gi|405963267|gb|EKC28856.1|//Aldehyde dehydrogenase family 3 member B1 [Crassostrea gigas]
Unigene0009270	1737	46.9703	14.9786	-1.64885	0.0371786	Down	0.00194557	NA	NA	NA	K18490//homeobox protein OTX2	gi|762155679|ref|XP_011415946.1|//PREDICTED: homeobox protein otx5-B-like isoform X3 [Crassostrea gigas]
Unigene0016473	2096	223.46	103.617	-1.10876	0.0219719	Down	0.000902516	NA	NA	NA	K20198//kinesin family member 17	gi|762154664|ref|XP_011415409.1|//PREDICTED: kinesin-like protein KIF17 isoform X3 [Crassostrea gigas]
Unigene0030952	340	71.3654	216.516	1.60118	9.90078e-08	Up	2.61259e-10	NA	NA	NA	NA	NA
Unigene0009961	1355	119.943	269.274	1.16673	0.000850476	Up	1.00854e-05	GO:0031224//intrinsic component of membrane	GO:0015556//C4-dicarboxylate transmembrane transporter activity;GO:0015142//tricarboxylic acid transmembrane transporter activity;GO:0017153//sodium:dicarboxylate symporter activity	GO:0044763//single-organism cellular process;GO:0006842//tricarboxylic acid transport;GO:0006814//sodium ion transport;GO:0015744//succinate transport	K14445//solute carrier family 13 (sodium-dependent dicarboxylate transporter), member 2/3/5	gi|762110799|ref|XP_011438100.1|//PREDICTED: solute carrier family 13 member 5-like [Crassostrea gigas]
Unigene0015914	2308	127.311	365.08	1.51986	4.50187e-06	Up	1.64594e-08	NA	NA	NA	NA	gi|762143802|ref|XP_011455160.1|//PREDICTED: PEST proteolytic signal-containing nuclear protein-like [Crassostrea gigas]
Unigene0006699	1305	301.662	150.42	-1.00393	0.0340478	Down	0.00172112	GO:0030126//COPI vesicle coat;GO:0030120//vesicle coat;GO:0030137//COPI-coated vesicle;GO:0000139//Golgi membrane	GO:0005198//structural molecule activity;GO:0005488//binding	GO:0006886//intracellular protein transport;GO:0048193//Golgi vesicle transport;GO:0015031//protein transport;GO:0016192//vesicle-mediated transport	K17301//coatomer subunit beta	gi|405964798|gb|EKC30244.1|//Coatomer subunit beta [Crassostrea gigas]
Unigene0014986	2842	2083.84	990.959	-1.07234	0.00140107	Down	1.92873e-05	NA	NA	NA	K05725//focal adhesion kinase 1 [EC:2.7.10.2];K08889//tyrosine-protein kinase Fer [EC:2.7.10.2];K05105//Eph receptor A4 [EC:2.7.10.1];K05094//fibroblast growth factor receptor 3 [EC:2.7.10.1]	gi|762143364|ref|XP_011454932.1|//PREDICTED: uncharacterized protein LOC105347506 [Crassostrea gigas]
Unigene0019081	1458	452.679	154.073	-1.55487	3.21212e-05	Down	1.54203e-07	NA	NA	NA	K00972//UDP-N-acetylglucosamine/UDP-N-acetylgalactosamine diphosphorylase [EC:2.7.7.23 2.7.7.83]	gi|762098425|ref|XP_011431605.1|//PREDICTED: UDP-N-acetylhexosamine pyrophosphorylase-like isoform X1 [Crassostrea gigas]
Unigene0012820	412	276.043	121.957	-1.17853	0.00294081	Down	5.33509e-05	NA	NA	NA	NA	gi|762082814|ref|XP_011424119.1|//PREDICTED: uncharacterized protein LOC105325988 [Crassostrea gigas]
Unigene0028322	574	237.576	801.776	1.75481	0.000438723	Up	4.26811e-06	NA	NA	NA	NA	gi|762119677|ref|XP_011442752.1|//PREDICTED: uncharacterized protein LOC105339048 [Crassostrea gigas]
Unigene0019088	1455	190.31	61.7631	-1.62353	0.000673431	Down	7.49351e-06	NA	NA	NA	K09091//hairy and enhancer of split related with YRPW motif	gi|762170115|ref|XP_011423478.1|//PREDICTED: class E basic helix-loop-helix protein 40-like [Crassostrea gigas]
Unigene0024807	810	9.88559	48.5326	2.29556	0.0134664	Up	0.000439261	NA	NA	NA	NA	NA
Unigene0000165	375	34.028	85.4194	1.32784	0.0212657	Up	0.000862014	NA	NA	NA	NA	NA
Unigene0007092	384	26.7092	66.947	1.32568	0.0184207	Up	0.000704525	NA	NA	NA	NA	NA
Unigene0024998	792	369.05	173.71	-1.08714	0.0266695	Down	0.00117602	GO:0030286//dynein complex	GO:0003774//motor activity	GO:0048870//cell motility;GO:0009154//purine ribonucleotide catabolic process	K10408//dynein heavy chain, axonemal	gi|762163493|ref|XP_011420037.1|//PREDICTED: dynein heavy chain 2, axonemal-like [Crassostrea gigas]
Unigene0026474	687	116.232	37.8483	-1.6187	0.000594595	Down	6.40834e-06	NA	NA	NA	NA	NA
Unigene0032046	344	234.647	115.142	-1.02708	0.00480848	Down	0.000108841	NA	NA	NA	NA	gi|762071898|ref|XP_011427457.1|//PREDICTED: protein MAATS1-like isoform X1 [Crassostrea gigas]
Unigene0009352	1322	14.509	41.2433	1.50721	0.0285119	Up	0.00129352	NA	NA	NA	NA	NA
Unigene0011774	735	13.6315	41.2461	1.59731	0.0272022	Up	0.00121421	NA	NA	NA	K04239//hypocretin (orexin) receptor 2;K04145//dopamine receptor D2;K04194//cholecystokinin A receptor;K04210//G protein-coupled receptor 83	gi|762102644|ref|XP_011433821.1|//PREDICTED: orexin receptor type 2-like [Crassostrea gigas]
Unigene0019007	1469	2708.68	1353.23	-1.00118	0.000190397	Down	1.43794e-06	NA	NA	NA	K05449//vascular endothelial growth factor C/D	gi|405950742|gb|EKC18709.1|//Vascular endothelial growth factor D [Crassostrea gigas]
Unigene0017899	1693	233.651	546.65	1.22626	7.69363e-05	Up	4.59108e-07	NA	GO:0016614//oxidoreductase activity, acting on CH-OH group of donors;GO:0016646//oxidoreductase activity, acting on the CH-NH group of donors, NAD or NADP as acceptor;GO:0048037//cofactor binding;GO:0047636//alanopine dehydrogenase activity;GO:0036094//small molecule binding;GO:0050662//coenzyme binding	GO:0044710//single-organism metabolic process;GO:0055114//oxidation-reduction process	NA	gi|821595234|ref|NP_001295792.1|//opine dehydrogenase-like [Crassostrea gigas]
Unigene0020240	1275	148.793	363.946	1.29042	0.00265708	Up	4.61629e-05	GO:0005634//nucleus	GO:0043565//sequence-specific DNA binding	GO:0006355//regulation of transcription, DNA-templated	K09330//paired mesoderm homeobox protein 2;K09323//homeobox protein aristaless-like 3	gi|762157167|ref|XP_011416732.1|//PREDICTED: retina and anterior neural fold homeobox protein 2-like [Crassostrea gigas]
Unigene0021957	1069	48.8474	123.742	1.34098	0.032403	Up	0.0015947	NA	NA	NA	NA	NA
Unigene0030895	2483	72.5859	193.544	1.4149	0.00841081	Up	0.000222744	NA	NA	NA	K05186//gamma-aminobutyric acid receptor subunit gamma;K00030//isocitrate dehydrogenase (NAD+) [EC:1.1.1.41];K00306//sarcosine oxidase / L-pipecolate oxidase [EC:1.5.3.1 1.5.3.7];K12075//discs large protein 2	gi|405966353|gb|EKC31648.1|//Putative RNA-directed DNA polymerase from transposon BS [Crassostrea gigas]
Unigene0017446	1794	555.763	161.236	-1.7853	2.34487e-06	Down	8.2004e-09	NA	NA	NA	K05719//integrin beta 1	gi|762125277|ref|XP_011445657.1|//PREDICTED: uncharacterized protein LOC105341060 [Crassostrea gigas]
Unigene0020014	1304	28.5936	75.6272	1.40322	0.0100702	Up	0.000289102	NA	NA	NA	NA	gi|405956171|gb|EKC22946.1|//Integrase/recombinase xerD-like protein [Crassostrea gigas]
Unigene0000601	862	13.2841	40.062	1.59253	0.0329792	Up	0.00163669	NA	NA	NA	NA	NA
Unigene0002212	403	32.1813	80.0956	1.3155	0.0161421	Up	0.000574886	NA	NA	NA	K04284//growth hormone secretagogue receptor;K04216//nociceptin receptor;K04215//mu-type opioid receptor	gi|762093530|ref|XP_011429223.1|//PREDICTED: FMRFamide receptor-like [Crassostrea gigas]
Unigene0002226	380	41.3104	94.4959	1.19375	0.0101936	Up	0.000294577	NA	NA	NA	NA	NA
Unigene0014104	3852	622.292	252.683	-1.30026	0.000147208	Down	1.01558e-06	NA	GO:0004084//branched-chain-amino-acid transaminase activity	GO:0009081//branched-chain amino acid metabolic process;GO:1901566//organonitrogen compound biosynthetic process;GO:0016053//organic acid biosynthetic process	K00826//branched-chain amino acid aminotransferase [EC:2.6.1.42]	gi|762086219|ref|XP_011425381.1|//PREDICTED: branched-chain-amino-acid aminotransferase, cytosolic-like [Crassostrea gigas]
Unigene0029312	514	123.403	321.662	1.38216	0.0188275	Up	0.000723674	NA	NA	NA	NA	gi|405964300|gb|EKC29800.1|//hypothetical protein CGI_10011215 [Crassostrea gigas]
Unigene0018939	1482	4251.02	1970.74	-1.10907	0.00945973	Down	0.00026526	NA	NA	NA	NA	gi|762168095|ref|XP_011422404.1|//PREDICTED: uncharacterized protein LOC105324877 isoform X1 [Crassostrea gigas]
Unigene0014225	3679	392.801	175.927	-1.15883	0.000664884	Down	7.37727e-06	NA	NA	NA	K16606//leucine-rich repeat-containing protein 49;K16717//centrosomal protein CEP97	gi|762108436|ref|XP_011436844.1|//PREDICTED: uncharacterized protein LOC105334925 isoform X1 [Crassostrea gigas]
Unigene0020105	1296	946.955	442.279	-1.09834	2.3673e-05	Down	1.09883e-07	NA	GO:0005515//protein binding	NA	K19695//neurocalcin delta;K19932//neuronal calcium sensor 1	gi|762074835|ref|XP_011439105.1|//PREDICTED: calcium-binding protein NCS-1-like [Crassostrea gigas]
Unigene0030496	373	209.841	1310.34	2.64257	4.26089e-17	Up	3.38661e-20	NA	NA	NA	NA	gi|762147477|ref|XP_011457052.1|//PREDICTED: prostate-associated microseminoprotein-like [Crassostrea gigas]
Unigene0012017	789	9.17486	248.849	4.76144	5.45672e-16	Up	4.68403e-19	NA	NA	NA	NA	gi|762108637|ref|XP_011436947.1|//PREDICTED: phytanoyl-CoA hydroxylase-interacting protein-like isoform X1 [Crassostrea gigas]
Unigene0008710	1877	55.7985	152.471	1.45024	9.32141e-05	Up	5.80847e-07	NA	NA	NA	NA	NA
Unigene0010021	1896	651.648	321.563	-1.01899	0.00878625	Down	0.000236319	GO:0030286//dynein complex;GO:0005858//axonemal dynein complex	GO:0003774//motor activity;GO:0003777//microtubule motor activity;GO:0016887//ATPase activity	GO:0003341//cilium movement;GO:0048870//cell motility;GO:0009154//purine ribonucleotide catabolic process	K10408//dynein heavy chain, axonemal	gi|762084797|ref|XP_011424900.1|//PREDICTED: dynein heavy chain 1, axonemal-like isoform X6 [Crassostrea gigas]
Unigene0003716	1276	146.781	16.8729	-3.12088	6.05434e-14	Down	7.12185e-17	NA	NA	NA	K01205//alpha-N-acetylglucosaminidase [EC:3.2.1.50]	gi|762151955|ref|XP_011413974.1|//PREDICTED: alpha-N-acetylglucosaminidase-like isoform X4 [Crassostrea gigas]
Unigene0018543	1559	1788.06	829.438	-1.10819	0.00432938	Down	9.48352e-05	NA	NA	NA	K15381//MFS transporter, FLVCR family, disrupted in renal carcinoma protein 2	gi|762120797|ref|XP_011443316.1|//PREDICTED: uncharacterized protein C1orf194 homolog isoform X1 [Crassostrea gigas]
Unigene0010394	300	100.399	45.0274	-1.15687	0.0476279	Down	0.00277623	NA	NA	NA	NA	NA
Unigene0010071	1285	184.54	86.6586	-1.09052	0.029652	Down	0.00138802	NA	NA	NA	NA	gi|762132513|ref|XP_011449443.1|//PREDICTED: uncharacterized protein LOC105343690 isoform X3 [Crassostrea gigas]
Unigene0022529	1010	23.3798	63.0041	1.43018	0.00930673	Up	0.00025949	NA	NA	NA	NA	gi|449270867|gb|EMC81515.1|//hypothetical protein A306_10660, partial [Columba livia]
Unigene0011106	577	116.374	270.603	1.21741	0.000132481	Up	8.8871e-07	NA	NA	NA	K04294//lysophosphatidic acid receptor 3;K04194//cholecystokinin A receptor;K04207//neuropeptide Y receptor type 5	gi|762088772|ref|XP_011426712.1|//PREDICTED: cholecystokinin receptor type A-like [Crassostrea gigas]
Unigene0010332	1172	31.699	9.34578	-1.76205	0.0433382	Down	0.00242249	NA	NA	NA	NA	gi|762086864|ref|XP_011425714.1|//PREDICTED: nucleoside diphosphate-linked moiety X motif 17-like [Crassostrea gigas]
Unigene0028173	582	108.388	24.9897	-2.11679	0.00335719	Down	6.53208e-05	GO:0000228//nuclear chromosome;GO:0000785//chromatin	GO:0046983//protein dimerization activity;GO:0003676//nucleic acid binding	GO:0034728//nucleosome organization;GO:0022610//biological adhesion;GO:0030154//cell differentiation;GO:0001503//ossification;GO:0007417//central nervous system development;GO:0009719//response to endogenous stimulus;GO:0007126//meiotic nuclear division;GO:0022604//regulation of cell morphogenesis;GO:0007599//hemostasis	K11253//histone H3	gi|955528840|ref|XP_014647200.1|//PREDICTED: histone H3 [Ceratotherium simum simum]
Unigene0014774	3020	58.5545	271.258	2.21181	0.000542337	Up	5.63821e-06	NA	NA	NA	NA	gi|762106772|ref|XP_011435983.1|//PREDICTED: uncharacterized protein LOC105334289 isoform X2 [Crassostrea gigas]
Unigene0001362	1241	74.67	227.085	1.60463	0.00259195	Up	4.44983e-05	NA	NA	NA	NA	gi|762078825|ref|XP_011456017.1|//PREDICTED: uncharacterized protein LOC105348342 [Crassostrea gigas]
Unigene0019766	1339	61.9113	20.1185	-1.62168	0.0239734	Down	0.0010114	NA	NA	NA	NA	gi|762107864|ref|XP_011436551.1|//PREDICTED: uncharacterized protein LOC105334697 [Crassostrea gigas]
Unigene0014738	3045	219.97	104.763	-1.07017	0.00295385	Down	5.38149e-05	NA	NA	NA	K10393//kinesin family member 2/24	gi|762110012|ref|XP_011437677.1|//PREDICTED: kinesin-like protein KIF24 [Crassostrea gigas]
Unigene0027267	636	46.8852	140.746	1.58589	0.0183359	Up	0.000699534	NA	NA	NA	NA	NA
Unigene0025373	735	144.272	328.061	1.18517	0.00270234	Up	4.72527e-05	NA	NA	NA	NA	NA
Unigene0030887	1208	402.017	1029.36	1.35642	4.00456e-05	Up	2.04977e-07	NA	GO:0016763//transferase activity, transferring pentosyl groups;GO:0016757//transferase activity, transferring glycosyl groups	GO:0072527//pyrimidine-containing compound metabolic process;GO:0055086//nucleobase-containing small molecule metabolic process	K00758//thymidine phosphorylase [EC:2.4.2.4]	gi|762161005|ref|XP_011418721.1|//PREDICTED: thymidine phosphorylase-like [Crassostrea gigas]
Unigene0002522	842	131.462	283.372	1.10805	0.000113309	Up	7.20476e-07	NA	NA	NA	NA	NA
Unigene0012225	515	29.9284	5.41637	-2.46612	0.00626255	Down	0.000154105	NA	NA	NA	NA	NA
Unigene0022727	994	319.477	114.41	-1.4815	6.01598e-06	Down	2.31158e-08	NA	NA	NA	K09232//zinc finger protein GLIS1/3	gi|762157577|ref|XP_011416946.1|//PREDICTED: zinc finger protein GLIS3-like [Crassostrea gigas]
Unigene0005042	343	22.8543	65.7968	1.52555	0.0069215	Up	0.000173482	NA	NA	NA	NA	NA
Unigene0024061	869	15.915	88.3099	2.47219	0.00196563	Up	3.06837e-05	NA	NA	NA	NA	NA
Unigene0029021	530	437.059	1667.72	1.93197	2.26648e-18	Up	1.5132e-21	NA	NA	NA	NA	gi|762119677|ref|XP_011442752.1|//PREDICTED: uncharacterized protein LOC105339048 [Crassostrea gigas]
Unigene0017913	1690	2569.05	1216.1	-1.07897	0.0170587	Down	0.000626416	NA	NA	NA	K15890//NADP+-dependent farnesol dehydrogenase [EC:1.1.1.216]	gi|762102456|ref|XP_011433720.1|//PREDICTED: dehydrogenase/reductase SDR family member 11-like isoform X1 [Crassostrea gigas]
Unigene0014356	3492	104.536	27.4164	-1.93089	0.000403645	Down	3.87552e-06	NA	NA	NA	K01593//aromatic-L-amino-acid decarboxylase [EC:4.1.1.28];K17570//hydrocephalus-inducing protein	gi|762143761|ref|XP_011455138.1|//PREDICTED: uncharacterized protein LOC105347671 [Crassostrea gigas]
Unigene0025408	760	57.6646	201.272	1.80339	0.000655357	Up	7.25072e-06	NA	NA	NA	NA	NA
Unigene0022545	1013	123.654	364.776	1.5607	0.000169301	Up	1.19492e-06	NA	NA	NA	NA	NA
Unigene0000948	591	6.03974	22.5031	1.89757	0.0240455	Up	0.00101674	NA	NA	NA	K18032//receptor-type tyrosine-protein phosphatase A [EC:3.1.3.48]	gi|762167067|ref|XP_011421851.1|//PREDICTED: cell death abnormality protein 1-like [Crassostrea gigas]
Unigene0016801	1983	26.3466	9.10027	-1.53364	0.0490985	Down	0.00291276	NA	GO:0016740//transferase activity	GO:0044260//cellular macromolecule metabolic process;GO:0044238//primary metabolic process;GO:0006974//cellular response to DNA damage stimulus	K04728//ataxia telangiectasia mutated family protein [EC:2.7.11.1]	gi|762149091|ref|XP_011412474.1|//PREDICTED: serine-protein kinase ATM-like [Crassostrea gigas]
Unigene0032178	1644	361.527	729.557	1.01292	0.0348667	Up	0.00177362	GO:0016021//integral component of membrane	NA	NA	K07996//matrix metalloproteinase-16 (membrane-inserted) [EC:3.4.24.-]	gi|762073540|ref|XP_011434206.1|//PREDICTED: uncharacterized protein LOC105333086 [Crassostrea gigas]
Unigene0006187	1347	110.173	262.511	1.25261	0.00124287	Up	1.63193e-05	NA	NA	NA	K08069//pantetheine hydrolase [EC:3.5.1.92]	gi|762138407|ref|XP_011452523.1|//PREDICTED: pantetheinase-like [Crassostrea gigas]
Unigene0023765	895	87.4566	41.6296	-1.07096	0.0245264	Down	0.00104998	NA	NA	NA	NA	NA
Unigene0023365	930	132.54	37.6443	-1.81592	0.0016604	Down	2.40715e-05	NA	NA	GO:0007165//signal transduction	NA	gi|762160129|ref|XP_011418274.1|//PREDICTED: uncharacterized protein LOC105321613 [Crassostrea gigas]
Unigene0011757	653	18.4749	52.611	1.5098	0.0435774	Up	0.00244252	NA	NA	NA	NA	NA
Unigene0001805	218	142.754	58.054	-1.29807	0.0312072	Down	0.00150708	NA	NA	NA	NA	NA
Unigene0006761	2024	294.324	138.575	-1.08674	0.0321644	Down	0.00157749	NA	NA	NA	K20283//golgin subfamily A member 4;K20478//golgin subfamily B member 1	gi|405968554|gb|EKC33617.1|//hypothetical protein CGI_10016472 [Crassostrea gigas]
Unigene0025226	772	118.877	301.311	1.34178	0.00109885	Up	1.37838e-05	NA	NA	NA	NA	NA
Unigene0017347	1824	205.508	98.4534	-1.06168	0.0113553	Down	0.000341878	NA	NA	NA	NA	gi|762111932|ref|XP_011438692.1|//PREDICTED: uncharacterized protein LOC105336172 [Crassostrea gigas]
Unigene0030004	468	98.329	26.2478	-1.90542	0.0199832	Down	0.000790073	NA	NA	NA	NA	NA
Unigene0023400	909	39.9142	13.6388	-1.54919	0.0218862	Down	0.00089621	NA	NA	NA	NA	gi|762143761|ref|XP_011455138.1|//PREDICTED: uncharacterized protein LOC105347671 [Crassostrea gigas]
Unigene0001327	648	121.703	60.1376	-1.01703	0.0383286	Down	0.00202037	NA	NA	NA	NA	gi|762114203|ref|XP_011439874.1|//PREDICTED: proto-oncogene c-Fos-like isoform X2 [Crassostrea gigas]
Unigene0024222	853	2588.63	1062.74	-1.2844	1.70338e-05	Down	7.63582e-08	NA	NA	NA	K19919//cysteine-rich secretory protein;K19867//LIM domain-binding protein 3	gi|405959589|gb|EKC25609.1|//Golgi-associated plant pathogenesis-related protein 1 [Crassostrea gigas]
Unigene0024379	834	29.3835	124.564	2.08381	0.0030316	Up	5.5896e-05	NA	NA	NA	K18032//receptor-type tyrosine-protein phosphatase A [EC:3.1.3.48]	gi|762138043|ref|XP_011452331.1|//PREDICTED: multiple epidermal growth factor-like domains protein 10 [Crassostrea gigas]
Unigene0017272	1844	468.963	135.937	-1.78654	1.7086e-07	Down	4.78022e-10	NA	NA	NA	NA	gi|762140605|ref|XP_011453474.1|//PREDICTED: uncharacterized protein LOC105346547 [Crassostrea gigas]
Unigene0017172	1867	24.8978	60.5387	1.28184	0.0359764	Up	0.00185996	NA	NA	NA	NA	NA
Unigene0022935	970	95.9873	44.939	-1.09487	0.0386642	Down	0.00205149	NA	NA	NA	K09527//DnaJ homolog subfamily C member 7	gi|762133305|ref|XP_011449851.1|//PREDICTED: tetratricopeptide repeat protein 16-like isoform X1 [Crassostrea gigas]
Unigene0025288	771	91.7104	32.2409	-1.50819	0.033379	Down	0.00167245	NA	NA	NA	K01062//platelet-activating factor acetylhydrolase [EC:3.1.1.47]	gi|405960175|gb|EKC26118.1|//Platelet-activating factor acetylhydrolase [Crassostrea gigas]
Unigene0004061	404	6.05446	38.8058	2.6802	0.00242781	Up	4.00595e-05	NA	NA	NA	NA	NA
Unigene0021014	1179	20.3657	69.4589	1.77002	0.00410568	Up	8.80575e-05	GO:0016021//integral component of membrane	NA	GO:0007165//signal transduction	K18808//toll-like receptor 13	gi|821595429|ref|NP_001295828.1|//toll-like receptor 4 precursor [Crassostrea gigas]
Unigene0008128	3467	111.211	320.509	1.52706	0.00189093	Up	2.91205e-05	NA	NA	NA	K11997//tripartite motif-containing protein 2/3;K12035//tripartite motif-containing protein 71 [EC:2.3.2.27]	gi|762156540|ref|XP_011416401.1|//PREDICTED: uncharacterized protein LOC105320241 [Crassostrea gigas]
Unigene0014854	2943	1679.11	104.689	-4.00352	6.4699e-35	Down	1.64555e-38	NA	NA	NA	K14755//carnosine synthase [EC:6.3.2.11]	gi|762149519|ref|XP_011412702.1|//PREDICTED: carnosine synthase 1-like isoform X2 [Crassostrea gigas]
Unigene0029606	492	43.1283	114.509	1.40875	0.00253337	Up	4.30095e-05	NA	NA	NA	NA	gi|762097579|ref|XP_011431363.1|//PREDICTED: uncharacterized protein LOC105331034 isoform X1 [Crassostrea gigas]
Unigene0021771	1083	48.0919	128.818	1.42147	0.015283	Up	0.000526928	NA	NA	NA	NA	NA
Unigene0026568	681	19.2015	80.8863	2.07468	0.0151773	Up	0.000519192	NA	NA	NA	NA	NA
Unigene0029536	500	18.706	86.9841	2.21725	0.0074404	Up	0.000191604	NA	NA	NA	NA	gi|762123086|ref|XP_011444514.1|//PREDICTED: anaphase-promoting complex subunit cdh1-like [Crassostrea gigas]
Unigene0012844	203	6.28473	29.2244	2.21725	0.00814688	Up	0.000213324	NA	NA	NA	K03927//carboxylesterase 2 [EC:3.1.1.1 3.1.1.84 3.1.1.56];K07378//neuroligin;K01050//cholinesterase [EC:3.1.1.8];K01049//acetylcholinesterase [EC:3.1.1.7]	gi|762077230|ref|XP_011449674.1|//PREDICTED: carboxylesterase 1C-like [Crassostrea gigas]
Unigene0014816	2987	164.249	333.441	1.02155	0.0126973	Up	0.000403275	GO:0016021//integral component of membrane	NA	NA	K06560//mannose receptor, C type	gi|762162502|ref|XP_011419517.1|//PREDICTED: macrophage mannose receptor 1-like [Crassostrea gigas]
Unigene0016469	2098	211.497	579.395	1.45391	0.00018723	Up	1.39884e-06	NA	NA	NA	NA	gi|405970935|gb|EKC35797.1|//hypothetical protein CGI_10011193 [Crassostrea gigas]
Unigene0019072	1456	41.3353	128.704	1.63861	0.000396175	Up	3.74082e-06	NA	NA	NA	K11968//ariadne-1 [EC:2.3.2.27]	gi|405963601|gb|EKC29163.1|//ariadne-1-like protein [Crassostrea gigas]
Unigene0003714	1285	80.7526	199.145	1.30224	0.0257697	Up	0.00112979	NA	NA	NA	K01205//alpha-N-acetylglucosaminidase [EC:3.2.1.50]	gi|762151955|ref|XP_011413974.1|//PREDICTED: alpha-N-acetylglucosaminidase-like isoform X4 [Crassostrea gigas]
Unigene0013986	4145	716.1	336.408	-1.08995	0.0146438	Down	0.000493495	NA	GO:0005544//calcium-dependent phospholipid binding;GO:0005509//calcium ion binding	NA	K17094//annexin A6	gi|762133647|ref|XP_011450033.1|//PREDICTED: annexin A6-like [Crassostrea gigas]
Unigene0008884	643	64.3014	27.6349	-1.21836	0.0409225	Down	0.00223126	NA	NA	NA	NA	gi|405969440|gb|EKC34411.1|//Transmembrane channel-like protein 7 [Crassostrea gigas]
Unigene0013865	4469	64.382	129.173	1.00457	0.0243397	Up	0.00103818	NA	GO:0003700//transcription factor activity, sequence-specific DNA binding;GO:0005488//binding	GO:0016043//cellular component organization;GO:0006355//regulation of transcription, DNA-templated	K09299//zinc finger homeobox protein 1/2	gi|762073427|ref|XP_011433626.1|//PREDICTED: LOW QUALITY PROTEIN: zinc finger E-box-binding homeobox 1-like [Crassostrea gigas]
Unigene0005404	422	8.36356	46.7978	2.48425	0.0031697	Up	5.93551e-05	NA	NA	NA	NA	NA
Unigene0028032	589	4.52377	19.0925	2.07741	0.0138655	Up	0.00045614	NA	NA	NA	NA	NA
Unigene0007667	278	18971.1	3770.48	-2.33098	3.5817e-09	Down	7.51549e-12	NA	NA	NA	NA	NA
Unigene0023567	912	70.349	31.9487	-1.13877	0.0286404	Down	0.00130117	NA	NA	NA	NA	gi|762160880|ref|XP_011418655.1|//PREDICTED: transient receptor potential cation channel subfamily A member 1-like isoform X1 [Crassostrea gigas]
Unigene0008695	4897	1100.12	414.255	-1.40907	0.00212046	Down	3.38421e-05	NA	NA	NA	K18533//adenylate/nucleoside-diphosphate kinase [EC:2.7.4.3 2.7.4.6]	gi|762151080|ref|XP_011413516.1|//PREDICTED: adenylate kinase 9-like isoform X7 [Crassostrea gigas]
Unigene0022235	1042	79.6036	197.874	1.31367	0.00112252	Up	1.43111e-05	NA	NA	NA	K12855//pre-mRNA-processing factor 6;K06252//tenascin	gi|762121344|ref|XP_011443598.1|//PREDICTED: von Willebrand factor D and EGF domain-containing protein-like [Crassostrea gigas]
Unigene0005200	445	17.3723	60.94	1.8106	0.00350042	Up	6.93726e-05	NA	NA	NA	NA	NA
Unigene0005359	318	40.0476	87.1078	1.12109	0.0123818	Up	0.00038853	NA	NA	NA	K08106//N-acetylgalactosamine 4-sulfate 6-O-sulfotransferase [EC:2.8.2.33]	gi|762152047|ref|XP_011414022.1|//PREDICTED: carbohydrate sulfotransferase 15-like [Crassostrea gigas]
Unigene0017058	1905	271.755	590.339	1.11924	0.0481495	Up	0.00281916	NA	GO:0016787//hydrolase activity;GO:0016798//hydrolase activity, acting on glycosyl bonds	GO:0008152//metabolic process	K01204//alpha-N-acetylgalactosaminidase [EC:3.2.1.49]	gi|405950671|gb|EKC18643.1|//Alpha-galactosidase A [Crassostrea gigas]
Unigene0033292	2060	157.182	78.3774	-1.00392	0.0489441	Down	0.00289426	NA	GO:0003824//catalytic activity	NA	K11729//acyl-CoA dehydrogenase family member 10	gi|762112080|ref|XP_011438767.1|//PREDICTED: acyl-CoA dehydrogenase family member 10-like isoform X2 [Crassostrea gigas]
Unigene0003675	2826	3058.21	1500.67	-1.02708	0.00286856	Down	5.16184e-05	NA	NA	NA	K09040//nuclear factor erythroid 2-related factor 1/3	gi|762159390|ref|XP_011417894.1|//PREDICTED: nuclear factor erythroid 2-related factor 2-like, partial [Crassostrea gigas]
Unigene0006257	916	4.79165	22.8226	2.25187	0.0116322	Up	0.000355763	NA	NA	NA	NA	gi|762120587|ref|XP_011443210.1|//PREDICTED: uncharacterized protein LOC105339383 [Crassostrea gigas]
Unigene0022793	987	118.554	275.967	1.21896	0.0197167	Up	0.000776033	NA	NA	NA	NA	NA
Unigene0026097	715	744.717	271.663	-1.45487	0.0113296	Down	0.000340025	NA	NA	NA	NA	gi|762154070|ref|XP_011415092.1|//PREDICTED: protein IQ-DOMAIN 14-like isoform X3 [Crassostrea gigas]
Unigene0015879	2323	88.9979	25.5773	-1.79891	0.043149	Down	0.0024089	NA	NA	NA	K01273//membrane dipeptidase [EC:3.4.13.19];K12852//116 kDa U5 small nuclear ribonucleoprotein component;K10408//dynein heavy chain, axonemal;K00030//isocitrate dehydrogenase (NAD+) [EC:1.1.1.41];K12354//ectonucleotide pyrophosphatase/phosphodiesterase family member 7 [EC:3.1.4.12]	gi|676470497|ref|XP_009058869.1|//hypothetical protein LOTGIDRAFT_164136 [Lottia gigantea]
Unigene0000771	2448	27.1602	75.1197	1.46769	0.0116144	Up	0.000354849	NA	NA	NA	K05401//toll-like receptor 3;K18808//toll-like receptor 13	gi|762136839|ref|XP_011451703.1|//PREDICTED: toll-like receptor 4 [Crassostrea gigas]
Unigene0018076	1654	39.4957	116.898	1.56549	7.48396e-05	Up	4.42556e-07	NA	NA	NA	K09614//corin [EC:3.4.21.-]	gi|762155040|ref|XP_011415610.1|//PREDICTED: atrial natriuretic peptide-converting enzyme-like isoform X2 [Crassostrea gigas]
Unigene0027954	593	7533.84	15496.3	1.04047	0.0113943	Up	0.00034387	NA	GO:0046872//metal ion binding	NA	NA	gi|762161577|ref|XP_011419017.1|//PREDICTED: teneurin-1-like [Crassostrea gigas]
Unigene0015761	2382	28.8147	67.2647	1.22304	0.0140133	Up	0.000463783	NA	NA	NA	K00108//choline dehydrogenase [EC:1.1.99.1];K01273//membrane dipeptidase [EC:3.4.13.19];K12852//116 kDa U5 small nuclear ribonucleoprotein component;K12354//ectonucleotide pyrophosphatase/phosphodiesterase family member 7 [EC:3.1.4.12];K17935//sorting nexin-29	gi|585722101|ref|XP_006813392.1|//PREDICTED: uncharacterized protein LOC102810040 [Saccoglossus kowalevskii]
Unigene0032190	711	6.14519	29.0026	2.23865	0.0152475	Up	0.000524022	NA	NA	NA	NA	gi|405977458|gb|EKC41909.1|//Phytanoyl-CoA dioxygenase, peroxisomal [Crassostrea gigas]
Unigene0021755	1091	198.332	72.4288	-1.45328	0.0156927	Down	0.000547305	NA	NA	NA	NA	gi|762076892|ref|XP_011447850.1|//PREDICTED: MYCBP-associated protein-like isoform X5 [Crassostrea gigas]
Unigene0032232	223	48.7564	242.883	2.3166	4.01434e-15	Up	3.82878e-18	NA	NA	NA	NA	NA
Unigene0020996	1178	21.3622	79.2571	1.89148	0.0101936	Up	0.000294031	NA	NA	NA	NA	NA
